# Supplementary material for: The Natural History of the Black Soldier Fly, Hermetia Illucens: Insights From Complete Mitochondrial Genome Sequences
Source: Research Square preprint supplement (doi:10.21203/rs.3.rs-1250528/v1), 2022-02-11
Supplement: Supplementary file 1 [file 02b92305dc92bd8e01335712.xlsx]

## Sheet: Feuille 1
Database	Country	Name	haplotype	Continent	Lab	Captive	Wild	Mined	List of all individuals used during the study. Origin and accession number.
	France	'16b_StMarcellinEnForez'	A	Europe	1		1	0
	France	'16e_StMarcellinEnForez'	A	Europe	1	0	1	0
	France	'20a_Lyon'	A	Europe	1	0	1	0
	France	'20b_Lyon'	A	Europe	1		1	0
	France	'21b_Montpellier'	A	Europe	1	0	1	0
	France	'21c_Montpellier'	A	Europe	1	0	1	0
	France	'21d_Montpellier'	A	Europe	1	0	1	0
	France	'21e_Montpellier'	A	Europe	1		1	0
	France	'21f_Montpellier'	A	Europe	1		1	0
	France	'21g_Montpellier'	A	Europe	1		1	0
	France	'21h_Montpellier'	A	Europe	1		1	0
	France	'28b_Lormont'	A	Europe	1	0	1	0
	France	'28c_Lormont'	A	Europe	1		1	0
	France	'29b_Lormont'	A	Europe	1		1	0
	France	'30a_LaForce'	A	Europe	1		1	0
	France	'30b_LaForce'	A	Europe	1		1	0
	France	'31a_SaintGeorges'	A	Europe	1		1	0
	France	'34b_Vincennes'	I	Europe	1		1	0
	France	'34c_Vincenne'	A	Europe	1		1	0
	France	'35b_Paris'	F	Europe	1		1	0
	France	'35d_Paris'	F	Europe	1		1	0
	France	'37b_LaRochelle'	1	Europe	1	0	1	0
	France	'38c_LaRochelle'	A	Europe	1	0	1	0
	France	'39b_Poitiers'	A	Europe	1		1	0
	France	'40a_Poitiers'	A	Europe	1		1	0
	France	'40b_Poitiers'	A	Europe	1	0	1	0
	France	'40c_Poitiers'	A	Europe	1		1	0
	France	'41b_Poitiers'	A	Europe	1		1	0
	France	'42b_Poitiers'	A	Europe	1	0	1	0
	France	'43b_Colomiers'	J	Europe	1		1	0
	France	'46b_ValloireSCisse'	A	Europe	1	0	1	0
	France	'47b_Blois'	A	Europe	1	0	1	0
	France	'47c_Blois'	A	Europe	1	0	1	0
	France	'48b_Blois_'	A	Europe	1		1	0
	France	'49b_Blois'	G	Europe	1		1	0
	France	'50b_Blois'	A	Europe	1		1	0
	France	'50c_Blois'	A	Europe	1		1	0
	France	'53a_Corbas'	A	Europe	1		1	0
	France	'54a_Dardilly'	A	Europe	1		1	0
	France	'56b_Paris'	F	Europe	1		1	0
	France	'56c_Paris'	A	Europe	1	0	1	0
	France	'7a_Perigueux'	A	Europe	1	0	1	0
	France	'7b_Perigueux'	A	Europe	1	0	1	0
	Ghana	'a1_CO1_Gha'	C	Africa	1	1		0	17 Ghana
	France	'a10_CO1_Avi'	C	Europe	1	1		0	16 F - Avignon
	France	'a11_CO1_Angou'	A	Europe	1	0	1	0	55 F - Angoulême
	France	'a12_CO1_Angou'	C	Europe	1		1	0	11 F - Angoulême
	France	'a13_CO1_Trescleoux'	A	Europe	1	0	1	0	42 F - Trescleoux
	France	'a14_CO1_Dieulefit'	A	Europe	1	0	1	0	52 F - Dieule_x001F_t
	Mexico	'a15_CO1_Mex'	D	SouthAmerica	1		1	0	57 Mexico
	Guyane	'a16_CO1_Guyane'	H	SouthAmerica	1		1	0	50 French Guiana
	Guyane	'a17_CO1_Guyane'	H	SouthAmerica	1		1	0	49 French Guiana
	Guyane	'a18_CO1_Guyane'	H	SouthAmerica	1		1	0	53 French Guiana
	Ghana	'a19_CO1_Gha2'	C	Africa	1	1		0	21 Ghana
	Ghana	'a2_CO1_Gha'	C	Africa	1	1		0	9 Ghana
	Ghana	'a20_CO1_Gha2'	C	Africa	1	1		0	20 Ghana
	Ghana	'a21_CO1_Gha2'	C	Africa	1	1		0	12 Ghana
NCBI	Taiwan	'a22_CO1_Tw'	C	Asia	1	1		0	7 Taiwan
	Kenya	'a25_CO1_KenI'	C	Africa	1		1	0	6 Kenya
	Kenya	'a26_CO1_KenI'	C	Africa	1		1	0	15 Kenya
	Kenya	'a27_CO1_KenI'	C	Africa	1		1	0	5 Kenya
	Kenya	'a28_CO1_KenB'	C	Africa	1		1	0	14 Kenya
	France	'a29_CO1_7a_Perigueux'	A	Europe	1	0	1	0	41 F - Périgueux
	Ghana	'a3_CO1_Gha'	C	Africa	1	1		0	13 Ghana
	France	'a30_CO1_19a_Champagne_Au_Mont'	A	Europe	1	0	1	0	28 F - Champagne au Mont D’Or
	France	'a31_CO1_20a_Lyon'	A	Europe	1	0	1	0	27 F - Lyon
	France	'a32_CO1_21a_Montpellier'	A	Europe	1	0	1	0	40 F - Montpelliers
	France	'a35_CO1_28a_Lormont'	A	Europe	1	0	1	0	45 F - Lormont
	France	'a36_CO1_29a_Lormont'	A	Europe	1	0	1	0	39 F - Lormont
	France	'a37_CO1_30a_LaForce'	A	Europe	1	0	1	0	38 F - La Force
	France	'a38_CO1_StGeorgesLB'	A	Europe	1	0	1	0	44 F - St Georges Les Baillargeaux
	France	'a39_CO1_33a_NogentSurMarne'	I	Europe	1		1	0	48 F - Nogent Sur Marne
NCBI	Taiwan	'a4_CO1_Tw'	A	Asia	1	0	1	0	46 Taiwan
	France	'a40_CO1_34a_Vincennes'	I	Europe	1		1	0	54 F - Vincennes
	France	'a41_CO1_35a_Paris'	A	Europe	1	0	1	0	37 F - Paris
	France	'a43_CO1_38a_LaRochelle'	A	Europe	1	0	1	0	51 F - La Rochelle
	France	'a44_CO1_39a_Poitiers'	A	Europe	1	0	1	0	36 F - Poitiers
	France	'a45_CO1_40a_Poitiers'	A	Europe	1	0	1	0	43 F - Poitiers
	France	'a46_CO1_41a_Poitiers'	A	Europe	1	0	1	0	35 F - Poitiers
	France	'a47_CO1_42a_Poitiers'	A	Europe	1	0	1	0	34 F - Poitiers
	France	'a48_CO1_43a_Colomiers'	J	Europe	1		1	0	56 F - Colomiers
	France	'a49_CO1_46a_ValloireSurCisse'	A	Europe	1	0	1	0	33 F - Valloire Sur Cisse
	France	'a50_CO1_47a_Blois'	A	Europe	1	0	1	0	32 F - Blois
	France	'a51_CO1_48a_Blois'	A	Europe	1	0	1	0	30 F - Blois
	France	'a52_CO1_49a_Blois'	G	Europe	1		1	0	47 F - Blois
	France	'a53_CO1_50a_Blois'	A	Europe	1	0	1	0	31 F - Blois
	France	'a54_CO1_16a_StMarcellinEnF'	A	Europe	1	0	1	0	26 F - St Marcellin En Forez
	France	'a55_CO1_27a_Lormont'	A	Europe	1	0	1	0	29 F - Lormont
	France	'a56_CO1_38b_LaRochelle'	A	Europe	1	0	1	0	25 F - La Rochelle
	France	'a57_CO1_56a_Paris'	A	Europe	1	0	1	0	24 F - Paris
	France	'a58_CO1_37a_LaRochelle'	A	Europe	1	0	1	0	23 F - La Rochelle
	Kenya	'a7_CO1_KenB'	C	Africa	1	1		0	19 Kenya
	Taiwan	'a8_CO1_Tw'	C	Asia	1	1		0	18 Taiwan
	Taiwan	'a9_CO1_Tw'	C	Asia	1	1		0	22 Taiwan
	France	'ADF04_illumina_CO1'	C	Europe	1	1		0	8 F - Beaufort En Vallée
Bold	India	'AGIRI258_17_Hermetia_India_'	A	Asia	0	0	0	1
	France	'AOM17_illumina_CO1'	C	Europe	1	1		0	10 F - Beaufort En Vallée
Bold	USA	'BBDIT097_11_Hermetia_United_States_Florida'	C	NorthAmerica	0	0	0	1
NCBI	USA	'Berkley_female_CO1'	C	NorthAmerica	0	0	0	1	4 United States
NCBI	USA	'Berkley_male_CO1'	C	NorthAmerica	0	0	0	1	3 United States
NCBI	UnitedKingdom	'Cambridge_UK_CO1'	C	Europe	0	0	0	1	2 United Kingdom
Bold	Australia	'DIQT070_08_Hermetia_Australia_Queensland'	A	Oceania	0	0	0	1
Bold	Australia	'DIQT119_08_Hermetia_Australia_Queensland'	E	Oceania	0	0	0	1
Bold	Australia	'DIQT134_08_Hermetia_Australia_Queensland'	A	Oceania	0	0	0	1
Bold	Australia	'DIQT199_08_Hermetia_Australia_Queensland'	A	Oceania	0	0	0	1
Bold	Australia	'DIQT200_08_Hermetia_Australia_Queensland'	E	Oceania	0	0	0	1
Bold	Australia	'DIQT292_08_Hermetia_Australia_Queensland'	E	Oceania	0	0	0	1
Bold	Australia	'DIQT690_09_Hermetia_Australia_Queensland'	A	Oceania	0	0	0	1
Bold	Australia	'DIQT808_10_Hermetia_Australia_Queensland'	E	Oceania	0	0	0	1
NCBI	SouthKorea	'FJ794355_South_Korea_Buyeo'	E	Asia	0	0	0	1
NCBI	SouthKorea	'FJ794356_South_Korea_Buyeo'	E	Asia	0	0	0	1
NCBI	SouthKorea	'FJ794357_South_Korea_Buyeo'	E	Asia	0	0	0	1
NCBI	SouthKorea	'FJ794358_South_Korea_Buyeo'	A	Asia	0	0	0	1
NCBI	SouthKorea	'FJ794359_South_Korea_Buyeo'	E	Asia	0	0	0	1
NCBI	SouthKorea	'FJ794360_South_Korea_Buyeo'	E	Asia	0	0	0	1
NCBI	SouthKorea	'FJ794361_South_Korea_Buyeo'	A	Asia	0	0	0	1
NCBI	SouthKorea	'FJ794362_South_Korea_Buyeo'	E	Asia	0	0	0	1
NCBI	SouthKorea	'FJ794363_South_Korea_Buyeo'	A	Asia	0	0	0	1
NCBI	SouthKorea	'FJ794364_South_Korea_Buyeo'	A	Asia	0	0	0	1
NCBI	SouthKorea	'FJ794365_South_Korea_Buyeo'	E	Asia	0	0	0	1
NCBI	SouthKorea	'FJ794366_South_Korea_Yangyang'	E	Asia	0	0	0	1
NCBI	SouthKorea	'FJ794367_South_Korea_Yangyang'	B	Asia	0	0	0	1
NCBI	SouthKorea	'FJ794368_South_Korea_Yangyang'	E	Asia	0	0	0	1
NCBI	SouthKorea	'FJ794369_South_Korea_Yangyang'	B	Asia	0	0	0	1
NCBI	SouthKorea	'FJ794370_South_Korea_Yangyang'	A	Asia	0	0	0	1
NCBI	SouthKorea	'FJ794370_South_Korea_Yangyang'	A	Asia	0	0	0	1
NCBI	SouthKorea	'FJ794371_South_Korea_Yangyang'	E	Asia	0	0	0	1
NCBI	SouthKorea	'FJ794372_South_Korea_Yangyang'	B	Asia	0	0	0	1
NCBI	SouthKorea	'FJ794373_South_Korea_Yangyang'	A	Asia	0	0	0	1
NCBI	SouthKorea	'FJ794374_South_Korea_Yangyang'	A	Asia	0	0	0	1
NCBI	SouthKorea	'FJ794375_South_Korea_Bonghwa'	B	Asia	0	0	0	1
NCBI	SouthKorea	'FJ794376_South_Korea_Bonghwa'	E	Asia	0	0	0	1
NCBI	SouthKorea	'FJ794377_South_Korea_Bonghwa'	B	Asia	0	0	0	1
NCBI	SouthKorea	'FJ794378_South_Korea_Bonghwa'	B	Asia	0	0	0	1
NCBI	SouthKorea	'FJ794379_South_Korea_Bonghwa'	B	Asia	0	0	0	1
NCBI	SouthKorea	'FJ794380_South_Korea_Bonghwa'	B	Asia	0	0	0	1
NCBI	SouthKorea	'FJ794381_South_Korea_Bonghwa'	B	Asia	0	0	0	1
NCBI	SouthKorea	'FJ794382_South_Korea_Bonghwa'	E	Asia	0	0	0	1
NCBI	SouthKorea	'FJ794383_South_Korea_Bonghwa'	B	Asia	0	0	0	1
NCBI	SouthKorea	'FJ794384_South_Korea_Bonghwa'	B	Asia	0	0	0	1
NCBI	SouthKorea	'FJ794385_South_Korea_Jeju_Island'	B	Asia	0	0	0	1
NCBI	SouthKorea	'FJ794386_South_Korea_Jeju_Island'	E	Asia	0	0	0	1
NCBI	SouthKorea	'FJ794387_South_Korea_Jeju_Island'	B	Asia	0	0	0	1
NCBI	SouthKorea	'FJ794388_South_Korea_Jeju_Island'	A	Asia	0	0	0	1
NCBI	SouthKorea	'FJ794389_South_Korea_Jeju_Island'	E	Asia	0	0	0	1
NCBI	SouthKorea	'FJ794390_South_Korea_Jeju_Island'	E	Asia	0	0	0	1
NCBI	SouthKorea	'FJ794391_South_Korea_Jeju_Island'	E	Asia	0	0	0	1
NCBI	SouthKorea	'FJ794392_South_Korea_Jeju_Island'	A	Asia	0	0	0	1
NCBI	SouthKorea	'FJ794393_South_Korea_Jeju_Island'	B	Asia	0	0	0	1
NCBI	SouthKorea	'FJ794394_South_Korea_Jeju_Island'	A	Asia	0	0	0	1
NCBI	SouthKorea	'FJ794395_South_Korea_Jeju_Island'	E	Asia	0	0	0	1
NCBI	SouthKorea	'FJ794396_South_Korea_Jeju_Island'	E	Asia	0	0	0	1
NCBI	SouthKorea	'FJ794397_South_Korea_Suwon'	B	Asia	0	0	0	1
NCBI	SouthKorea	'FJ794398_South_Korea_Suwon'	B	Asia	0	0	0	1
NCBI	SouthKorea	'FJ794399_South_Korea_Suwon'	B	Asia	0	0	0	1
NCBI	SouthKorea	'FJ794400_South_Korea_Suwon'	E	Asia	0	0	0	1
NCBI	SouthKorea	'FJ794401_South_Korea_Suwon'	F	Asia	0	0	0	1
NCBI	SouthKorea	'FJ794402_South_Korea_Suwon'	E	Asia	0	0	0	1
NCBI	SouthKorea	'FJ794403_South_Korea_Suwon'	A	Asia	0	0	0	1
NCBI	SouthKorea	'FJ794404_South_Korea_Suwon'	A	Asia	0	0	0	1
NCBI	SouthKorea	'FJ794405_South_Korea_Suwon'	A	Asia	0	0	0	1
NCBI	SouthKorea	'FJ794406_South_Korea_Suwon'	A	Asia	0	0	0	1
NCBI	SouthKorea	'FJ794407_South_Korea_Gurae'	B	Asia	0	0	0	1
NCBI	SouthKorea	'FJ794408_South_Korea_Gurae'	B	Asia	0	0	0	1
NCBI	SouthKorea	'FJ794409_South_Korea_Gurae'	B	Asia	0	0	0	1
NCBI	SouthKorea	'FJ794410_South_Korea_Gurae'	B	Asia	0	0	0	1
NCBI	SouthKorea	'FJ794411_South_Korea_Gurae'	B	Asia	0	0	0	1
NCBI	SouthKorea	'FJ794412_South_Korea_Gurae'	B	Asia	0	0	0	1
NCBI	SouthKorea	'FJ794413_South_Korea_Gurae'	B	Asia	0	0	0	1
NCBI	SouthKorea	'FJ794414_South_Korea_Gurae'	B	Asia	0	0	0	1
NCBI	SouthKorea	'FJ794415_South_Korea_Youngchun'	B	Asia	0	0	0	1
NCBI	SouthKorea	'FJ794416_South_Korea_Youngchun'	B	Asia	0	0	0	1
NCBI	SouthKorea	'FJ794417_South_Korea_Youngchun'	B	Asia	0	0	0	1
NCBI	SouthKorea	'FJ794418_South_Korea_Youngchun'	B	Asia	0	0	0	1
NCBI	SouthKorea	'FJ794419_South_Korea_Youngchun'	B	Asia	0	0	0	1
NCBI	SouthKorea	'FJ794420_South_Korea_Youngchun'	B	Asia	0	0	0	1
NCBI	SouthKorea	'FJ794421_South_Korea_Youngchun'	B	Asia	0	0	0	1
NCBI	SouthKorea	'FJ794422_South_Korea_Youngchun'	E	Asia	0	0	0	1
Bold	India	'GBDP27980_19_Hermetia_India_'	A	Asia	0	0	0	1
Bold	India	'GBDP27981_19_Hermetia_India_'	40	Asia	0	0	0	1
Bold	Nigeria	'GBMIN61491_17_Hermetia_Nigeria_'	C	Africa	0	0	0	1
Bold	Bangladesh	'GBMNB24896_20_Hermetia_Bangladesh_'	C	Asia	0	0	0	1
Bold	SouthAfrica	'GBMNC1268_20_Hermetia_South_Africa_'	C	Africa	0	0	0	1
Bold	SouthAfrica	'GBMNC1271_20_Hermetia_South_Africa_'	C	Africa	0	0	0	1
Bold	Spain	'GBMNC1274_20_Hermetia_Spain_'	C	Europe	0	0	0	1
Bold	Spain	'GBMNC1274_20_Hermetia_Spain_'	C	Europe	0	0	0	1
Bold	Kenya	'GBMNC1276_20_Hermetia_Kenya_'	C	Africa	0	0	0	1
Bold	Australia	'GBMNC1277_20_Hermetia_Australia_'	A	Oceania	0	0	0	1
Bold	Australia	'GBMNC1278_20_Hermetia_Australia_'	E	Oceania	0	0	0	1
Bold	Australia	'GBMNC1279_20_Hermetia_Australia_'	A	Oceania	0	0	0	1
Bold	Australia	'GBMNC1280_20_Hermetia_Australia_'	E	Oceania	0	0	0	1
Bold	Australia	'GBMNC1281_20_Hermetia_Australia_'	A	Oceania	0	0	0	1
Bold	USA	'GBMNC1282_20_Hermetia_United_States_'	C	NorthAmerica	0	0	0	1
Bold	SouthAfrica	'GBMNC1283_20_Hermetia_South_Africa_'	C	Africa	0	0	0	1
Bold	SouthAfrica	'GBMNC1286_20_Hermetia_South_Africa_'	C	Africa	0	0	0	1
Bold	Spain	'GBMNC1289_20_Hermetia_Spain_'	C	Europe	0	0	0	1
Bold	Kenya	'GBMNC1291_20_Hermetia_Kenya_'	C	Africa	0	0	0	1
Bold	Australia	'GBMNC1292_20_Hermetia_Australia_'	A	Oceania	0	0	0	1
Bold	Australia	'GBMNC1293_20_Hermetia_Australia_'	E	Oceania	0	0	0	1
Bold	Australia	'GBMNC1294_20_Hermetia_Australia_'	A	Oceania	0	0	0	1
Bold	Australia	'GBMNC1295_20_Hermetia_Australia_'	E	Oceania	0	0	0	1
Bold	Australia	'GBMNC1296_20_Hermetia_Australia_'	A	Oceania	0	0	0	1
Bold	Paraguay	'GBMNC1300_20_Hermetia_Paraguay_'	3	SouthAmerica	0	0	0	1
Bold	USA	'GBMNC1311_20_Hermetia_United_States_'	24	NorthAmerica	0	0	0	1
Bold	USA	'GBMNC1313_20_Hermetia_United_States_'	E	NorthAmerica	0	0	0	1
Bold	Australia	'GBMNC1314_20_Hermetia_Australia_'	A	Oceania	0	0	0	1
Bold	Malaysia	'GBMNC1316_20_Hermetia_Malaysia_'	A	Asia	0	0	0	1
Bold	Switzerland	'GBMNC1323_20_Hermetia_Switzerland_'	A	Europe	0	0	0	1
Bold	Colombia	'GBMNC1326_20_Hermetia_Colombia_'	2	SouthAmerica	0	0	0	1
Bold	Bolivia	'GBMNC1335_20_Hermetia_Bolivia_'	A	SouthAmerica	0	0	0	1
Bold	Bhutan	'GBMNC1341_20_Hermetia_Bhutan_'	C	Asia	0	0	0	1
Bold	Ghana	'GBMNC1343_20_Hermetia_Ghana_'	G	Africa	0	0	0	1
Bold	Zambia	'GBMNC1345_20_Hermetia_Zambia_'	A	Africa	0	0	0	1
Bold	Madagascar	'GBMNC1346_20_Hermetia_Madagascar_'	A	Africa	0	0	0	1
Bold	Madagascar	'GBMNC1347_20_Hermetia_Madagascar_'	A	Africa	0	0	0	1
Bold	Malaysia	'GBMNC1348_20_Hermetia_Malaysia_'	E	Asia	0	0	0	1
Bold	Singapore	'GBMNC1350_20_Hermetia_Singapore_'	E	Asia	0	0	0	1
Bold	USA	'GBMNC1351_20_Hermetia_United_States_'	38	NorthAmerica	0	0	0	1
Bold	USA	'GBMNC1352_20_Hermetia_United_States_'	41	NorthAmerica	0	0	0	1
Bold	SouthAfrica	'GBMNC1353_20_Hermetia_South_Africa_'	C	Africa	0	0	0	1
Bold	Poland	'GBMNC1354_20_Hermetia_Poland_'	F	Europe	0	0	0	1
Bold	China	'GBMNC1355_20_Hermetia_China_'	C	Asia	0	0	0	1
Bold	Australia	'GBMNC1356_20_Hermetia_Australia_'	A	Oceania	0	0	0	1
Bold	Singapore	'GBMNC1357_20_Hermetia_Singapore_'	E	Asia	0	0	0	1
Bold	Australia	'GBMNC1358_20_Hermetia_Australia_'	E	Oceania	0	0	0	1
Bold	Thailand	'GBMNC1360_20_Hermetia_Thailand_'	E	Asia	0	0	0	1
Bold	Thailand	'GBMNC1361_20_Hermetia_Thailand_'	E	Asia	0	0	0	1
Bold	Thailand	'GBMNC1362_20_Hermetia_Thailand_'	E	Asia	0	0	0	1
Bold	Vietnam	'GBMNC1363_20_Hermetia_Vietnam_'	C	Asia	0	0	0	1
Bold	Malaysia	'GBMNC1364_20_Hermetia_Malaysia_'	34	Asia	0	0	0	1
Bold	Singapore	'GBMNC1365_20_Hermetia_Singapore_'	A	Asia	0	0	0	1
Bold	Australia	'GBMNC1366_20_Hermetia_Australia_'	A	Oceania	0	0	0	1
Bold	Australia	'GBMNC1367_20_Hermetia_Australia_'	A	Oceania	0	0	0	1
Bold	China	'GBMNC1368_20_Hermetia_China_'	C	Asia	0	0	0	1
Bold	Indonesia	'GBMNC1369_20_Hermetia_Indonesia_'	C	Asia	0	0	0	1
Bold	Italy	'GBMNC1370_20_Hermetia_Italy_'	F	Europe	0	0	0	1
Bold	France	'GBMNC1371_20_Hermetia_France_Avignon'	C	Europe	0	0	0	1
Bold	France	'GBMNC1372_20_Hermetia_France_Sele'	C	Europe	0	0	0	1
Bold	France	'GBMNC1373_20_Hermetia_France_NextAlim'	C	Europe	0	0	0	1
Bold	USA	'GBMNC1374_20_Hermetia_United_States_'	41	NorthAmerica	0	0	0	1
Bold	USA	'GBMNC1375_20_Hermetia_United_States_'	42	NorthAmerica	0	0	0	1
Bold	USA	'GBMNC1376_20_Hermetia_United_States_'	C	NorthAmerica	0	0	0	1
Bold	USA	'GBMNC1377_20_Hermetia_United_States_'	38	NorthAmerica	0	0	0	1
Bold	Singapore	'GBMNC1378_20_Hermetia_Singapore_'	E	Asia	0	0	0	1
Bold	Singapore	'GBMNC1379_20_Hermetia_Singapore_'	A	Asia	0	0	0	1
Bold	Singapore	'GBMNC1380_20_Hermetia_Singapore_'	E	Asia	0	0	0	1
Bold	Singapore	'GBMNC1381_20_Hermetia_Singapore_'	A	Asia	0	0	0	1
Bold	USA	'GBMNC1382_20_Hermetia_United_States_'	41	NorthAmerica	0	0	0	1
Bold	USA	'GBMNC1383_20_Hermetia_United_States_'	41	NorthAmerica	0	0	0	1
Bold	USA	'GBMNC1384_20_Hermetia_United_States_'	41	NorthAmerica	0	0	0	1
Bold	USA	'GBMNC1385_20_Hermetia_United_States_'	41	NorthAmerica	0	0	0	1
Bold	USA	'GBMNC1386_20_Hermetia_United_States_'	41	NorthAmerica	0	0	0	1
Bold	USA	'GBMNC1387_20_Hermetia_United_States_'	38	NorthAmerica	0	0	0	1
Bold	Reunion	'GBMNC1388_20_Hermetia_Reunion_'	A	Africa	0	0	0	1
Bold	Benin	'GBMNC1389_20_Hermetia_Benin_'	G	Africa	0	0	0	1
Bold	Thailand	'GBMNC1390_20_Hermetia_Thailand_'	E	Asia	0	0	0	1
Bold	USA	'GBMNC1391_20_Hermetia_United_States_'	C	NorthAmerica	0	0	0	1
Bold	USA	'GBMNC1392_20_Hermetia_United_States_'	C	NorthAmerica	0	0	0	1
Bold	USA	'GBMNC1393_20_Hermetia_United_States_'	C	NorthAmerica	0	0	0	1
Bold	USA	'GBMNC1394_20_Hermetia_United_States_'	C	NorthAmerica	0	0	0	1
Bold	USA	'GBMNC1395_20_Hermetia_United_States_'	C	NorthAmerica	0	0	0	1
Bold	USA	'GBMNC1396_20_Hermetia_United_States_'	C	NorthAmerica	0	0	0	1
Bold	Uganda	'GBMNC1397_20_Hermetia_Uganda_'	F	Africa	0	0	0	1
Bold	Uganda	'GBMNC1398_20_Hermetia_Uganda_'	F	Africa	0	0	0	1
Bold	Uganda	'GBMNC1399_20_Hermetia_Uganda_'	F	Africa	0	0	0	1
Bold	Uganda	'GBMNC1400_20_Hermetia_Uganda_'	F	Africa	0	0	0	1
Bold	Uganda	'GBMNC1401_20_Hermetia_Uganda_'	F	Africa	0	0	0	1
Bold	Uganda	'GBMNC1402_20_Hermetia_Uganda_'	F	Africa	0	0	0	1
Bold	USA	'GBMNC1403_20_Hermetia_United_States_'	A	NorthAmerica	0	0	0	1
Bold	USA	'GBMNC1404_20_Hermetia_United_States_'	A	NorthAmerica	0	0	0	1
Bold	USA	'GBMNC1405_20_Hermetia_United_States_'	A	NorthAmerica	0	0	0	1
Bold	USA	'GBMNC1406_20_Hermetia_United_States_'	A	NorthAmerica	0	0	0	1
Bold	USA	'GBMNC1407_20_Hermetia_United_States_'	C	NorthAmerica	0	0	0	1
Bold	USA	'GBMNC1408_20_Hermetia_United_States_'	C	NorthAmerica	0	0	0	1
Bold	USA	'GBMNC1409_20_Hermetia_United_States_'	C	NorthAmerica	0	0	0	1
Bold	USA	'GBMNC1410_20_Hermetia_United_States_'	C	NorthAmerica	0	0	0	1
Bold	Nigeria	'GBMNC1411_20_Hermetia_Nigeria_'	G	Africa	0	0	0	1
Bold	Nigeria	'GBMNC1412_20_Hermetia_Nigeria_'	G	Africa	0	0	0	1
Bold	Nigeria	'GBMNC1413_20_Hermetia_Nigeria_'	G	Africa	0	0	0	1
Bold	Nigeria	'GBMNC1414_20_Hermetia_Nigeria_'	G	Africa	0	0	0	1
Bold	Nigeria	'GBMNC1415_20_Hermetia_Nigeria_'	G	Africa	0	0	0	1
Bold	Thailand	'GBMNC1416_20_Hermetia_Thailand_'	33	Asia	0	0	0	1
Bold	Nigeria	'GBMNC1417_20_Hermetia_Nigeria_'	G	Africa	0	0	0	1
Bold	Thailand	'GBMNC1418_20_Hermetia_Thailand_'	33	Asia	0	0	0	1
Bold	Thailand	'GBMNC1419_20_Hermetia_Thailand_'	33	Asia	0	0	0	1
Bold	Thailand	'GBMNC1420_20_Hermetia_Thailand_'	33	Asia	0	0	0	1
Bold	SouthAfrica	'GBMNC1421_20_Hermetia_South_Africa_'	C	Africa	0	0	0	1
Bold	SouthAfrica	'GBMNC1422_20_Hermetia_South_Africa_'	C	Africa	0	0	0	1
Bold	SouthAfrica	'GBMNC1423_20_Hermetia_South_Africa_'	C	Africa	0	0	0	1
Bold	SouthAfrica	'GBMNC1424_20_Hermetia_South_Africa_'	C	Africa	0	0	0	1
Bold	SouthAfrica	'GBMNC1425_20_Hermetia_South_Africa_'	C	Africa	0	0	0	1
Bold	SouthAfrica	'GBMNC1426_20_Hermetia_South_Africa_'	C	Africa	0	0	0	1
Bold	CostaRica	'GBMNC1427_20_Hermetia_Costa_Rica_'	29	SouthAmerica	0	0	0	1
Bold	Kenya	'GBMNC1428_20_Hermetia_Kenya_'	C	Africa	0	0	0	1
Bold	Kenya	'GBMNC1429_20_Hermetia_Kenya_'	C	Africa	0	0	0	1
Bold	Kenya	'GBMNC1430_20_Hermetia_Kenya_'	C	Africa	0	0	0	1
Bold	Kenya	'GBMNC1431_20_Hermetia_Kenya_'	C	Africa	0	0	0	1
Bold	Kenya	'GBMNC1432_20_Hermetia_Kenya_'	C	Africa	0	0	0	1
Bold	Kenya	'GBMNC1433_20_Hermetia_Kenya_'	C	Africa	0	0	0	1
Bold	Netherlands	'GBMNC1434_20_Hermetia_Netherlands_'	C	Europe	0	0	0	1
Bold	Netherlands	'GBMNC1435_20_Hermetia_Netherlands_'	C	Europe	0	0	0	1
Bold	Netherlands	'GBMNC1436_20_Hermetia_Netherlands_'	C	Europe	0	0	0	1
Bold	Netherlands	'GBMNC1437_20_Hermetia_Netherlands_'	C	Europe	0	0	0	1
Bold	Netherlands	'GBMNC1438_20_Hermetia_Netherlands_'	C	Europe	0	0	0	1
Bold	Ghana	'GBMNC1439_20_Hermetia_Ghana_'	G	Africa	0	0	0	1
Bold	Ghana	'GBMNC1440_20_Hermetia_Ghana_'	G	Africa	0	0	0	1
Bold	Ghana	'GBMNC1441_20_Hermetia_Ghana_'	G	Africa	0	0	0	1
Bold	Ghana	'GBMNC1442_20_Hermetia_Ghana_'	G	Africa	0	0	0	1
Bold	Ghana	'GBMNC1443_20_Hermetia_Ghana_'	G	Africa	0	0	0	1
Bold	Ghana	'GBMNC1444_20_Hermetia_Ghana_'	G	Africa	0	0	0	1
Bold	Australia	'GBMNC1445_20_Hermetia_Australia_'	C	Oceania	0	0	0	1
Bold	Australia	'GBMNC1446_20_Hermetia_Australia_'	C	Oceania	0	0	0	1
Bold	Australia	'GBMNC1447_20_Hermetia_Australia_'	C	Oceania	0	0	0	1
Bold	Australia	'GBMNC1448_20_Hermetia_Australia_'	C	Oceania	0	0	0	1
Bold	Australia	'GBMNC1449_20_Hermetia_Australia_'	C	Oceania	0	0	0	1
Bold	Australia	'GBMNC1450_20_Hermetia_Australia_'	C	Oceania	0	0	0	1
Bold	China	'GBMNC1451_20_Hermetia_China_'	C	Asia	0	0	0	1
Bold	China	'GBMNC1452_20_Hermetia_China_'	C	Asia	0	0	0	1
Bold	China	'GBMNC1453_20_Hermetia_China_'	C	Asia	0	0	0	1
Bold	China	'GBMNC1454_20_Hermetia_China_'	C	Asia	0	0	0	1
Bold	Australia	'GCQT2822_18_Hermetia_COI_5P_Australia_Queensland'	31	Oceania	0	0	0	1
Bold	Australia	'GMAQB475_17_Hermetia_Australia_Queensland'	A	Oceania	0	0	0	1
Bold	Australia	'GMAQB476_17_Hermetia_Australia_Queensland'	A	Oceania	0	0	0	1
Bold	Australia	'GMAQB477_17_Hermetia_Australia_Queensland'	A	Oceania	0	0	0	1
Bold	Australia	'GMAQB478_17_Hermetia_Australia_Queensland'	A	Oceania	0	0	0	1
Bold	Australia	'GMAQB479_17_Hermetia_Australia_Queensland'	A	Oceania	0	0	0	1
Bold	Australia	'GMAQB480_17_Hermetia_Australia_Queensland'	A	Oceania	0	0	0	1
Bold	Australia	'GMAQB481_17_Hermetia_Australia_Queensland'	A	Oceania	0	0	0	1
Bold	Australia	'GMAQB482_17_Hermetia_Australia_Queensland'	A	Oceania	0	0	0	1
Bold	Australia	'GMAQB483_17_Hermetia_Australia_Queensland'	A	Oceania	0	0	0	1
Bold	Australia	'GMAQB484_17_Hermetia_Australia_Queensland'	A	Oceania	0	0	0	1
Bold	Australia	'GMAQB485_17_Hermetia_Australia_Queensland'	A	Oceania	0	0	0	1
Bold	Australia	'GMAQB486_17_Hermetia_Australia_Queensland'	A	Oceania	0	0	0	1
Bold	Australia	'GMAQB487_17_Hermetia_Australia_Queensland'	A	Oceania	0	0	0	1
Bold	Australia	'GMAQK868_17_Hermetia_Australia_Queensland'	A	Oceania	0	0	0	1
Bold	Australia	'GMAQK869_17_Hermetia_Australia_Queensland'	A	Oceania	0	0	0	1
Bold	Australia	'GMAQK874_17_Hermetia_Australia_Queensland'	A	Oceania	0	0	0	1
Bold	Australia	'GMAQK878_17_Hermetia_Australia_Queensland'	A	Oceania	0	0	0	1
Bold	Australia	'GMAQK880_17_Hermetia_Australia_Queensland'	A	Oceania	0	0	0	1
Bold	Australia	'GMAQK882_17_Hermetia_Australia_Queensland'	A	Oceania	0	0	0	1
Bold	Australia	'GMAQK883_17_Hermetia_Australia_Queensland'	A	Oceania	0	0	0	1
Bold	Australia	'GMAQK884_17_Hermetia_Australia_Queensland'	A	Oceania	0	0	0	1
Bold	Australia	'GMAQK885_17_Hermetia_Australia_Queensland'	A	Oceania	0	0	0	1
Bold	Australia	'GMAQK886_17_Hermetia_Australia_Queensland'	A	Oceania	0	0	0	1
Bold	Australia	'GMAQK887_17_Hermetia_Australia_Queensland'	A	Oceania	0	0	0	1
Bold	Australia	'GMAQK888_17_Hermetia_Australia_Queensland'	A	Oceania	0	0	0	1
Bold	Australia	'GMAQK889_17_Hermetia_Australia_Queensland'	A	Oceania	0	0	0	1
Bold	Australia	'GMAQK890_17_Hermetia_Australia_Queensland'	A	Oceania	0	0	0	1
Bold	Australia	'GMAQK891_17_Hermetia_Australia_Queensland'	A	Oceania	0	0	0	1
Bold	Australia	'GMAQK892_17_Hermetia_Australia_Queensland'	A	Oceania	0	0	0	1
Bold	Australia	'GMAQK893_17_Hermetia_Australia_Queensland'	A	Oceania	0	0	0	1
Bold	Australia	'GMAQK895_17_Hermetia_Australia_Queensland'	A	Oceania	0	0	0	1
Bold	Australia	'GMAQK896_17_Hermetia_Australia_Queensland'	A	Oceania	0	0	0	1
Bold	Australia	'GMAQK897_17_Hermetia_Australia_Queensland'	A	Oceania	0	0	0	1
Bold	Australia	'GMAQK899_17_Hermetia_Australia_Queensland'	A	Oceania	0	0	0	1
Bold	Australia	'GMAQK901_17_Hermetia_Australia_Queensland'	A	Oceania	0	0	0	1
Bold	Australia	'GMAQL936_17_Hermetia_Australia_Queensland'	A	Oceania	0	0	0	1
Bold	Australia	'GMAQL938_17_Hermetia_Australia_Queensland'	A	Oceania	0	0	0	1
Bold	Australia	'GMAQL942_17_Hermetia_Australia_Queensland'	A	Oceania	0	0	0	1
Bold	Bangladesh	'GMBCB1658_15_Hermetia_Bangladesh_Chittagong'	C	Asia	0	0	0	1
Bold	Bangladesh	'GMBCF3748_15_Hermetia_Bangladesh_Chittagong'	C	Asia	0	0	0	1
Bold	Bangladesh	'GMBCF5433_15_Hermetia_Bangladesh_Chittagong'	A	Asia	0	0	0	1
Bold	Bangladesh	'GMBCF5435_15_Hermetia_Bangladesh_Chittagong'	A	Asia	0	0	0	1
Bold	Bangladesh	'GMBCF5436_15_Hermetia_Bangladesh_Chittagong'	A	Asia	0	0	0	1
Bold	Bangladesh	'GMBCF5437_15_Hermetia_Bangladesh_Chittagong'	A	Asia	0	0	0	1
Bold	Bangladesh	'GMBCF5438_15_Hermetia_Bangladesh_Chittagong'	A	Asia	0	0	0	1
Bold	Bangladesh	'GMBCF5439_15_Hermetia_Bangladesh_Chittagong'	A	Asia	0	0	0	1
Bold	Bangladesh	'GMBCF5441_15_Hermetia_Bangladesh_Chittagong'	A	Asia	0	0	0	1
Bold	Bangladesh	'GMBCF5443_15_Hermetia_Bangladesh_Chittagong'	A	Asia	0	0	0	1
Bold	Bangladesh	'GMBCF5446_15_Hermetia_Bangladesh_Chittagong'	A	Asia	0	0	0	1
Bold	Bangladesh	'GMBCF5447_15_Hermetia_Bangladesh_Chittagong'	A	Asia	0	0	0	1
Bold	Bangladesh	'GMBCF5452_15_Hermetia_Bangladesh_Chittagong'	A	Asia	0	0	0	1
Bold	Bangladesh	'GMBCH3831_15_Hermetia_Bangladesh_Chittagong'	A	Asia	0	0	0	1
Bold	Bangladesh	'GMBCI4775_15_Hermetia_Bangladesh_Chittagong'	A	Asia	0	0	0	1
Bold	Bangladesh	'GMBCI4781_15_Hermetia_Bangladesh_Chittagong'	A	Asia	0	0	0	1
Bold	Bangladesh	'GMBCN759_15_Hermetia_Bangladesh_Chittagong'	A	Asia	0	0	0	1
Bold	Bangladesh	'GMBCN835_15_Hermetia_Bangladesh_Chittagong'	A	Asia	0	0	0	1
Bold	Bangladesh	'GMBCN836_15_Hermetia_Bangladesh_Chittagong'	A	Asia	0	0	0	1
Bold	Gabon	'GMGGG033_17_Hermetia_Gabon_Moyen_Ogooue'	G	Africa	0	0	0	1
Bold	Australia	'GMQQB248_18_Hermetia_Australia_Queensland'	A	Oceania	0	0	0	1
Bold	Australia	'GMQQB249_18_Hermetia_Australia_Queensland'	A	Oceania	0	0	0	1
Bold	Australia	'GMQQB250_18_Hermetia_Australia_Queensland'	A	Oceania	0	0	0	1
Bold	Australia	'GMQQK014_18_Hermetia_Australia_Queensland'	A	Oceania	0	0	0	1
NCBI	Kenya	'HM381282_USA'	C	Africa	0	0	0	1
NCBI	Australia	'HM399363_Australia'	E	Oceania	0	0	0	1
NCBI	USA	'HM433911_USA'	41	NorthAmerica	0	0	0	1
NCBI	SouthKorea	'HQ541184_Korea'	B	Asia	0	0	0	1
NCBI	SouthKorea	'HQ541185_Korea'	B	Asia	0	0	0	1
NCBI	SouthKorea	'HQ541186_Korea'	A	Asia	0	0	0	1
NCBI	SouthKorea	'HQ541187_Korea'	E	Asia	0	0	0	1
NCBI	SouthKorea	'HQ541188_Korea'	B	Asia	0	0	0	1
NCBI	SouthKorea	'HQ541189_Korea'	E	Asia	0	0	0	1
NCBI	SouthKorea	'HQ541190_Korea'	E	Asia	0	0	0	1
NCBI	SouthKorea	'HQ541191_Korea'	E	Asia	0	0	0	1
NCBI	SouthKorea	'HQ541192_Korea'	B	Asia	0	0	0	1
NCBI	SouthKorea	'HQ541193_Korea'	B	Asia	0	0	0	1
NCBI	SouthKorea	'HQ541194_Korea'	A	Asia	0	0	0	1
NCBI	SouthKorea	'HQ541195_Korea'	B	Asia	0	0	0	1
NCBI	SouthKorea	'HQ541196_Korea'	B	Asia	0	0	0	1
NCBI	SouthKorea	'HQ541197_Korea'	B	Asia	0	0	0	1
NCBI	SouthKorea	'HQ541198_Korea'	B	Asia	0	0	0	1
NCBI	SouthKorea	'HQ541199_Korea'	B	Asia	0	0	0	1
NCBI	SouthKorea	'HQ541200_Korea'	B	Asia	0	0	0	1
NCBI	SouthKorea	'HQ541201_Korea'	B	Asia	0	0	0	1
NCBI	SouthKorea	'HQ541202_Korea'	E	Asia	0	0	0	1
NCBI	SouthKorea	'HQ541203_Korea'	B	Asia	0	0	0	1
NCBI	SouthKorea	'HQ541204_Korea'	B	Asia	0	0	0	1
NCBI	SouthKorea	'HQ541205_Korea'	B	Asia	0	0	0	1
NCBI	SouthKorea	'HQ541206_Korea'	E	Asia	0	0	0	1
NCBI	SouthKorea	'HQ541207_Korea'	A	Asia	0	0	0	1
NCBI	SouthKorea	'HQ541208_Korea'	A	Asia	0	0	0	1
NCBI	SouthKorea	'HQ541209_Korea'	A	Asia	0	0	0	1
NCBI	SouthKorea	'HQ541210_Korea'	E	Asia	0	0	0	1
NCBI	SouthKorea	'HQ541211_Korea'	B	Asia	0	0	0	1
NCBI	SouthKorea	'HQ541212_Korea'	E	Asia	0	0	0	1
NCBI	SouthKorea	'HQ541213_Korea'	E	Asia	0	0	0	1
NCBI	SouthKorea	'HQ541214_Korea'	B	Asia	0	0	0	1
NCBI	SouthKorea	'HQ541215_Korea'	B	Asia	0	0	0	1
NCBI	SouthKorea	'HQ541216_Korea'	B	Asia	0	0	0	1
NCBI	SouthKorea	'HQ541217_Korea'	B	Asia	0	0	0	1
NCBI	SouthKorea	'HQ541218_Korea'	B	Asia	0	0	0	1
NCBI	SouthKorea	'HQ541219_Korea'	B	Asia	0	0	0	1
NCBI	SouthKorea	'HQ541220_Korea'	B	Asia	0	0	0	1
NCBI	SouthKorea	'HQ541221_Korea'	B	Asia	0	0	0	1
NCBI	SouthKorea	'HQ541222_Korea'	B	Asia	0	0	0	1
NCBI	SouthKorea	'HQ541223_Korea'	B	Asia	0	0	0	1
NCBI	SouthKorea	'HQ541224_Korea'	A	Asia	0	0	0	1
NCBI	SouthKorea	'HQ541225_Korea'	B	Asia	0	0	0	1
NCBI	SouthKorea	'HQ541226_Korea'	B	Asia	0	0	0	1
NCBI	SouthKorea	'HQ541227_Korea'	B	Asia	0	0	0	1
NCBI	SouthKorea	'HQ541228_Korea'	A	Asia	0	0	0	1
NCBI	SouthKorea	'HQ541229_Korea'	B	Asia	0	0	0	1
NCBI	SouthKorea	'HQ541230_Korea'	B	Asia	0	0	0	1
NCBI	SouthKorea	'HQ541231_Korea'	B	Asia	0	0	0	1
NCBI	SouthKorea	'HQ541232_Korea'	B	Asia	0	0	0	1
NCBI	SouthKorea	'HQ541233_Korea'	A	Asia	0	0	0	1
NCBI	SouthKorea	'HQ541234_Korea'	A	Asia	0	0	0	1
NCBI	SouthKorea	'HQ541235_Korea'	E	Asia	0	0	0	1
NCBI	SouthKorea	'HQ541236_Korea'	32	Asia	0	0	0	1
NCBI	SouthKorea	'HQ541237_Korea'	B	Asia	0	0	0	1
NCBI	SouthKorea	'HQ541238_Korea'	E	Asia	0	0	0	1
NCBI	SouthKorea	'HQ541239_Korea'	B	Asia	0	0	0	1
NCBI	SouthKorea	'HQ541240_Korea'	B	Asia	0	0	0	1
NCBI	SouthKorea	'HQ541241_Korea'	B	Asia	0	0	0	1
NCBI	SouthKorea	'HQ541242_Korea'	B	Asia	0	0	0	1
NCBI	SouthKorea	'HQ541243_Korea'	B	Asia	0	0	0	1
NCBI	SouthKorea	'HQ541244_Korea'	B	Asia	0	0	0	1
NCBI	SouthKorea	'HQ541245_Korea'	E	Asia	0	0	0	1
NCBI	SouthKorea	'HQ541246_Korea'	A	Asia	0	0	0	1
NCBI	SouthKorea	'HQ541247_Korea'	E	Asia	0	0	0	1
NCBI	SouthKorea	'HQ541248_Korea'	B	Asia	0	0	0	1
NCBI	SouthKorea	'HQ541249_Korea'	A	Asia	0	0	0	1
NCBI	SouthKorea	'HQ541250_Korea'	B	Asia	0	0	0	1
NCBI	SouthKorea	'HQ541251_Korea'	B	Asia	0	0	0	1
NCBI	SouthKorea	'HQ541252_Korea'	B	Asia	0	0	0	1
NCBI	SouthKorea	'HQ541253_Korea'	37	Asia	0	0	0	1
NCBI	SouthKorea	'HQ541254_Korea'	B	Asia	0	0	0	1
NCBI	SouthKorea	'HQ541255_Korea'	B	Asia	0	0	0	1
NCBI	SouthKorea	'HQ541256_Korea'	B	Asia	0	0	0	1
NCBI	SouthKorea	'HQ541257_Korea'	B	Asia	0	0	0	1
NCBI	SouthKorea	'HQ541258_Korea'	B	Asia	0	0	0	1
NCBI	SouthKorea	'HQ541259_Korea'	B	Asia	0	0	0	1
NCBI	SouthKorea	'HQ541260_Korea'	B	Asia	0	0	0	1
NCBI	SouthKorea	'HQ541261_Korea'	B	Asia	0	0	0	1
NCBI	SouthKorea	'HQ541262_Korea'	B	Asia	0	0	0	1
NCBI	SouthKorea	'HQ541263_Korea'	B	Asia	0	0	0	1
NCBI	SouthKorea	'HQ541264_Korea'	B	Asia	0	0	0	1
NCBI	SouthKorea	'HQ541265_Korea'	B	Asia	0	0	0	1
NCBI	SouthKorea	'HQ541266_Korea'	B	Asia	0	0	0	1
NCBI	SouthKorea	'HQ541267_Korea'	B	Asia	0	0	0	1
NCBI	SouthKorea	'HQ541268_Korea'	E	Asia	0	0	0	1
NCBI	SouthKorea	'HQ541269_Korea'	B	Asia	0	0	0	1
NCBI	SouthKorea	'HQ541270_Korea'	B	Asia	0	0	0	1
NCBI	SouthKorea	'HQ541271_Korea'	B	Asia	0	0	0	1
NCBI	SouthKorea	'HQ541272_Korea'	A	Asia	0	0	0	1
NCBI	SouthKorea	'HQ541273_Korea'	E	Asia	0	0	0	1
NCBI	SouthKorea	'HQ541274_Korea'	E	Asia	0	0	0	1
NCBI	SouthKorea	'HQ541275_Korea'	B	Asia	0	0	0	1
NCBI	SouthKorea	'HQ541276_Korea'	E	Asia	0	0	0	1
NCBI	SouthKorea	'HQ541277_Korea'	E	Asia	0	0	0	1
NCBI	SouthKorea	'HQ541278_Korea'	B	Asia	0	0	0	1
NCBI	SouthKorea	'HQ541279_Korea'	B	Asia	0	0	0	1
NCBI	SouthKorea	'HQ541280_Korea'	A	Asia	0	0	0	1
NCBI	SouthKorea	'HQ541281_Korea'	A	Asia	0	0	0	1
NCBI	SouthKorea	'HQ541282_Korea'	B	Asia	0	0	0	1
NCBI	SouthKorea	'HQ541283_Korea'	E	Asia	0	0	0	1
NCBI	SouthKorea	'HQ541284_Korea'	B	Asia	0	0	0	1
NCBI	SouthKorea	'HQ541285_Korea'	B	Asia	0	0	0	1
NCBI	SouthKorea	'HQ541286_Korea'	A	Asia	0	0	0	1
NCBI	SouthKorea	'HQ541287_Korea'	A	Asia	0	0	0	1
NCBI	SouthKorea	'HQ541288_Korea'	A	Asia	0	0	0	1
NCBI	SouthKorea	'HQ541289_Korea'	A	Asia	0	0	0	1
NCBI	SouthKorea	'HQ541290_Korea'	B	Asia	0	0	0	1
NCBI	SouthKorea	'HQ541291_Korea'	A	Asia	0	0	0	1
NCBI	SouthKorea	'HQ541292_Korea'	B	Asia	0	0	0	1
NCBI	SouthKorea	'HQ541293_Korea'	A	Asia	0	0	0	1
NCBI	SouthKorea	'HQ541294_Korea'	A	Asia	0	0	0	1
NCBI	SouthKorea	'HQ541295_Korea'	B	Asia	0	0	0	1
NCBI	SouthKorea	'HQ541296_Korea'	B	Asia	0	0	0	1
NCBI	SouthKorea	'HQ541297_Korea'	B	Asia	0	0	0	1
NCBI	SouthKorea	'HQ541298_Korea'	B	Asia	0	0	0	1
NCBI	SouthKorea	'HQ541299_Korea'	B	Asia	0	0	0	1
NCBI	SouthKorea	'HQ541300_Korea'	36	Asia	0	0	0	1
NCBI	SouthKorea	'HQ541301_Korea'	B	Asia	0	0	0	1
NCBI	SouthKorea	'HQ541302_Korea'	B	Asia	0	0	0	1
NCBI	SouthKorea	'HQ541303_Korea'	B	Asia	0	0	0	1
NCBI	SouthKorea	'HQ541304_Korea'	B	Asia	0	0	0	1
NCBI	SouthKorea	'HQ541305_Korea'	A	Asia	0	0	0	1
NCBI	SouthKorea	'HQ541306_Korea'	B	Asia	0	0	0	1
NCBI	SouthKorea	'HQ541307_Korea'	B	Asia	0	0	0	1
NCBI	SouthKorea	'HQ541308_Korea'	B	Asia	0	0	0	1
NCBI	SouthKorea	'HQ541309_Korea'	B	Asia	0	0	0	1
NCBI	SouthKorea	'HQ541310_Korea'	B	Asia	0	0	0	1
NCBI	SouthKorea	'HQ541311_Korea'	A	Asia	0	0	0	1
NCBI	SouthKorea	'HQ541312_Korea'	B	Asia	0	0	0	1
NCBI	SouthKorea	'HQ541313_Korea'	B	Asia	0	0	0	1
NCBI	SouthKorea	'HQ541314_Korea'	B	Asia	0	0	0	1
NCBI	SouthKorea	'HQ541315_Korea'	A	Asia	0	0	0	1
NCBI	SouthKorea	'HQ541316_Korea'	A	Asia	0	0	0	1
NCBI	SouthKorea	'HQ541317_Korea'	E	Asia	0	0	0	1
NCBI	SouthKorea	'HQ541318_Korea'	E	Asia	0	0	0	1
NCBI	SouthKorea	'HQ541319_Korea'	B	Asia	0	0	0	1
NCBI	SouthKorea	'HQ541320_Korea'	E	Asia	0	0	0	1
NCBI	SouthKorea	'HQ541321_Korea'	B	Asia	0	0	0	1
Bold	Portugal	'IBIDP012_19_Hermetia_Portugal_Porto'	C	Europe	0	0	0	1
Bold	Portugal	'IBIDP032_19_Hermetia_Portugal_'	C	Europe	0	0	0	1
Bold	Portugal	'IBIDP088_19_Hermetia_Portugal_Braga'	G	Europe	0	0	0	1
Bold	Portugal	'IBIDP106_19_Hermetia_Portugal_Braganca'	C	Europe	0	0	0	1
NCBI	Taiwan	'JAFD129Tw'	C	Asia	1	1		0
	Ghana	'JAFD154bGha'	C	Africa	1		1	0
	France	'JAFD810_Dieulefit'	A	Europe	1	0	1	0
	France	'JAFD810_Trescleoux'	A	Europe	1	0	1	0
	Mexico	'JAFD810mex'	D	SouthAmerica	1		1	0
	France	'JAFD94a_CF'	C	Europe	1	1		0
	France	'JAMD129Av_Ava'	C	Europe	1	1		0
	France	'JAMD129Av'	C	Europe	1	1		0
NCBI	Kenya	'JAMD129KenBon'	C	Africa	1		1	0
NCBI	Taiwan	'JAMD206bTw1'	A	Asia	1	0	1	0
	FrenchGuiana	'JAMD511aGuy'	H	SouthAmerica	1		1	0
Bold	CostaRica	'JICCX063_16_Hermetia_Costa_Rica_Guanacaste'	30	SouthAmerica	0	0	0	1
Bold	CostaRica	'JICCY519_16_Hermetia_Costa_Rica_Guanacaste'	30	SouthAmerica	0	0	0	1
Bold	CostaRica	'JICCY523_16_Hermetia_Costa_Rica_Guanacaste'	30	SouthAmerica	0	0	0	1
Bold	CostaRica	'JICCY533_16_Hermetia_Costa_Rica_Guanacaste'	30	SouthAmerica	0	0	0	1
Bold	CostaRica	'JICCY534_16_Hermetia_Costa_Rica_Guanacaste'	30	SouthAmerica	0	0	0	1
Bold	CostaRica	'JICCY535_16_Hermetia_Costa_Rica_Guanacaste'	30	SouthAmerica	0	0	0	1
Bold	CostaRica	'JICCY540_16_Hermetia_Costa_Rica_Guanacaste'	30	SouthAmerica	0	0	0	1
Bold	CostaRica	'JICCY542_16_Hermetia_Costa_Rica_Guanacaste'	30	SouthAmerica	0	0	0	1
Bold	CostaRica	'JICCY543_16_Hermetia_Costa_Rica_Guanacaste'	30	SouthAmerica	0	0	0	1
Bold	CostaRica	'JICCY546_16_Hermetia_Costa_Rica_Guanacaste'	30	SouthAmerica	0	0	0	1
Bold	CostaRica	'JICCY557_16_Hermetia_Costa_Rica_Guanacaste'	30	SouthAmerica	0	0	0	1
Bold	CostaRica	'JICCY559_16_Hermetia_Costa_Rica_Guanacaste'	30	SouthAmerica	0	0	0	1
NCBI	Kenya	'JLD278aKenIci'	C	Africa	1		1	0
NCBI	Kenya	'JLD278bKenMabu'	C	Africa	1	1		0
NCBI	PapuaNewGuinea	'JN308280_Papua_New_Guinea'	A	Oceania	0	0	0	1
NCBI	PapuaNewGuinea	'JN308281_Papua_New_Guinea'	A	Oceania	0	0	0	1
NCBI	PapuaNewGuinea	'JN308282_Papua_New_Guinea'	A	Oceania	0	0	0	1
NCBI	PapuaNewGuinea	'JN308283_Papua_New_Guinea'	A	Oceania	0	0	0	1
NCBI	PapuaNewGuinea	'JN308284_Papua_New_Guinea'	A	Oceania	0	0	0	1
NCBI	PapuaNewGuinea	'JN308285_Papua_New_Guinea'	A	Oceania	0	0	0	1
NCBI	PapuaNewGuinea	'JN308286_Papua_New_Guinea'	A	Oceania	0	0	0	1
NCBI	PapuaNewGuinea	'JN308287_Papua_New_Guinea'	A	Oceania	0	0	0	1
NCBI	Canada	'KM928149_Canada_Alberta_Elk_Island_NP_Wood_Bison_Trail'	E	NorthAmerica	0	0	0	1
NCBI	Canada	'KM967419_Canada_Alberta_Elk_Island_NP_Wood_Bison_Trail'	E	NorthAmerica	0	0	0	1
NCBI	FrenchPolynesia	'KX053393_French_Polynesia_moorea_island_gump_station'	A	Oceania	0	0	0	1
NCBI	FrenchPolynesia	'KX053394_French_Polynesia_moorea_island_motu_tiahura'	A	Oceania	0	0	0	1
NCBI	Russia	'KY817115_Russia'	C	Europe	0	0	0	1
NCBI	Madagascar	'LR778154_Madagascar'	A	Africa	0	0	0	1
NCBI	Madagascar	'LR778155_Madagascar'	A	Africa	0	0	0	1
NCBI	Zambia	'LR778156_Zambia'	A	Africa	0	0	0	1
NCBI	Kenya	'LR778157_Kenya'	C	Africa	0	0	0	1
NCBI	Ghana	'LR778158_Ghana'	G	Africa	0	0	0	1
NCBI	Bhutan	'LR778159_Bhutan'	E	Asia	0	0	0	1
NCBI	Bhutan	'LR778160_Bhutan'	C	Asia	0	0	0	1
NCBI	Thailand	'LR778161_Thailand'	E	Asia	0	0	0	1
NCBI	Thailand	'LR778162_Thailand'	23	Asia	0	0	0	1
NCBI	Bolivia	'LR778192_Bolivia_La_Paz_Pilon_Lajas_Indigebous_Territory_Park_and_Biosphere_Reserve'	21	SouthAmerica	0	0	0	1
NCBI	Bolivia	'LR778193_Bolivia_La_Paz_Pilon_Lajas_Indigebous_Territory_Park_and_Biosphere_Reserve'	H	SouthAmerica	0	0	0	1
NCBI	Bolivia	'LR778194_Bolivia_La_Paz_Pilon_Lajas_Indigebous_Territory_Park_and_Biosphere_Reserve'	15	SouthAmerica	0	0	0	1
NCBI	Bolivia	'LR778195_Bolivia_La_Paz_Pilon_Lajas_Indigebous_Territory_Park_and_Biosphere_Reserve'	A	SouthAmerica	0	0	0	1
NCBI	Bolivia	'LR778196_Bolivia_La_Paz_Pilon_Lajas_Indigebous_Territory_Park_and_Biosphere_Reserve'	19	SouthAmerica	0	0	0	1
NCBI	Bolivia	'LR778197_Bolivia_La_Paz_Pilon_Lajas_Indigebous_Territory_Park_and_Biosphere_Reserve'	8	SouthAmerica	0	0	0	1
NCBI	Bolivia	'LR778198_Bolivia_La_Paz_Pilon_Lajas_Indigebous_Territory_Park_and_Biosphere_Reserve'	9	SouthAmerica	0	0	0	1
NCBI	Bolivia	'LR778199_Bolivia_La_Paz_Pilon_Lajas_Indigebous_Territory_Park_and_Biosphere_Reserve'	6	SouthAmerica	0	0	0	1
NCBI	Bolivia	'LR778200_Bolivia_La_Paz_Pilon_Lajas_Indigebous_Territory_Park_and_Biosphere_Reserve'	22	SouthAmerica	0	0	0	1
NCBI	Bolivia	'LR778201_Bolivia_La_Paz_Pilon_Lajas_Indigebous_Territory_Park_and_Biosphere_Reserve'	13	SouthAmerica	0	0	0	1
NCBI	Bolivia	'LR778202_Bolivia_La_Paz_Pilon_Lajas_Indigebous_Territory_Park_and_Biosphere_Reserve'	4	SouthAmerica	0	0	0	1
NCBI	Bolivia	'LR778203_Bolivia_La_Paz_Pilon_Lajas_Indigebous_Territory_Park_and_Biosphere_Reserve'	14	SouthAmerica	0	0	0	1
NCBI	Colombia	'LR778204_Colombia_La_Paz_Pilon_Lajas_Indigebous_Territory_Park_and_Biosphere_Reserve'	2	SouthAmerica	0	0	0	1
NCBI	Brazil	'LR778205_Brazil_Amazonas_Amazonas'	20	SouthAmerica	0	0	0	1
NCBI	Brazil	'LR778206_Brazil_Sao_Paolo_Sao_Paolo'	17	SouthAmerica	0	0	0	1
NCBI	Switzerland	'LR778207_Switzerland_Basel_region_Basel'	A	Europe	0	0	0	1
NCBI	Mexico	'LR778208_Mexico_unknown_unknown'	D	SouthAmerica	0	0	0	1
NCBI	Venezuela	'LR778209_Venezuela_Yaracuy_state_San_Felipe'	27	SouthAmerica	0	0	0	1
NCBI	Venezuela	'LR778210_Venezuela_Aragua_state_unknown'	25	SouthAmerica	0	0	0	1
NCBI	Venezuela	'LR778211_Venezuela_San_Antonio_de_Los_Altos_unknown'	26	SouthAmerica	0	0	0	1
NCBI	Peru	'LR778212_Peru_El_Ingenio_unknown'	11	SouthAmerica	0	0	0	1
NCBI	Peru	'LR778213_Peru_El_Ingenio_unknown'	16	SouthAmerica	0	0	0	1
NCBI	Malaysia	'LR792223_Malaysia_Borneo_Sabah_Penampang'	A	Asia	0	0	0	1
NCBI	Viet	'LR792224_Viet_Nam_Thua_Thien_Hue_Bach_Ma_NP'	A	Asia	0	0	0	1
NCBI	Australia	'LR792225_Australia_Queensland_Polly_Creek'	A	Oceania	0	0	0	1
NCBI	Samoa	'LR792226_USA_Oceania_American_Samoa'	E	Oceania	0	0	0	1
Bold	Australia	'LR792227_Australia_Queensland_Polly_Creek'	35	Oceania	0	0	0	1
NCBI	USA	'LR792228_USA_Florida_Panama_City'	24	NorthAmerica	0	0	0	1
NCBI	USA	'LR792229_USA_North_Carolina_Durham'	41	NorthAmerica	0	0	0	1
NCBI	Peru	'LR792230_Peru_Madre_de_Dios_Rio'	18	SouthAmerica	0	0	0	1
NCBI	Peru	'LR792231_Peru_Loreto_San_Juan_de_Pamplona'	7	SouthAmerica	0	0	0	1
NCBI	Peru	'LR792232_Peru_Loreto_San_Juan_de_Pamplona'	10	SouthAmerica	0	0	0	1
NCBI	Panama	'LR792233_Panama_Chiriqui_Boquete'	28	SouthAmerica	0	0	0	1
NCBI	FrenchGuiana	'LR792234_French_Guiana_Roura_Relais_Patawa'	5	SouthAmerica	0	0	0	1
NCBI	Brazil	'LR792235_Brazil_Amazonas_unknown'	20	SouthAmerica	0	0	0	1
NCBI	Brazil	'LR792236_Brazil_Sao_Paolo_Ribeirao_Preto'	H	SouthAmerica	0	0	0	1
NCBI	Brazil	'LR792237_Brazil_Sao_Paolo_Ribeirao_Preto'	20	SouthAmerica	0	0	0	1
NCBI	Bolivia	'LR792238_Bolivia_La_Paz_Mapiri'	15	SouthAmerica	0	0	0	1
NCBI	Paraguay	'LR792239_Paraguay_Amambay_Chacarru'	3	SouthAmerica	0	0	0	1
NCBI	Paraguay	'LR792240_Paraguay_Amambay_Chacarru'	12	SouthAmerica	0	0	0	1
NCBI	Paraguay	'LR792241_Paraguay_Amambay_Chacarru'	H	SouthAmerica	0	0	0	1
NCBI	Thailand	'LR792242_Thailand_Surat_Thani_Khlong_Sok'	23	Asia	0	0	0	1
NCBI	Australia	'LR792253_Australia_West_Australia_Perth'	A	Oceania	0	0	0	1
NCBI	Australia	'LR792254_Australia_West_Australia_Perth'	E	Oceania	0	0	0	1
NCBI	Australia	'LR792255_Australia_New_South_Wales_Beaumont_Hills'	A	Oceania	0	0	0	1
NCBI	Australia	'LR792256_Australia_New_South_Wales_Beaumont_Hills'	E	Oceania	0	0	0	1
NCBI	Australia	'LR792257_Australia_New_South_Wales_Wyoming'	A	Oceania	0	0	0	1
NCBI	Kenya	'LR792258_Kenya_Nairobi_Nairobi'	C	Africa	0	0	0	1
NCBI	Kenya	'LR792259_Kenya_Nairobi_Nairobi'	C	Africa	0	0	0	1
NCBI	Spain	'LR792260_Spain_Alicante_Alicante'	C	Europe	0	0	0	1
NCBI	Switzerland	'LR792261_Switzerland_Laufenburg_Frick'	39	Europe	0	0	0	1
NCBI	Switzerland	'LR792262_Switzerland_Laufenburg_Frick'	F	Europe	0	0	0	1
NCBI	SouthAfrica	'LR792263_South_Africa_Western_Cape_Cape_Town'	C	Africa	0	0	0	1
NCBI	SouthAfrica	'LR792264_South_Africa_Western_Cape_Cape_Town'	C	Africa	0	0	0	1
NCBI	SouthAfrica	'LR792265_South_Africa_KwaZulu_Natal_Durban'	C	Africa	0	0	0	1
NCBI	SouthAfrica	'LR792266_South_Africa_KwaZulu_Natal_Durban'	C	Africa	0	0	0	1
NCBI	USA	'LR792267_USA_Texas_College_Station'	C	NorthAmerica	0	0	0	1
NCBI	Australia	'LR812706_Australia_West_Australia_Perth'	A	Oceania	0	0	0	1
NCBI	Australia	'LR812707_Australia_West_Australia_Perth'	E	Oceania	0	0	0	1
NCBI	Australia	'LR812708_Australia_New_South_Wales_Beaumont_Hills'	A	Oceania	0	0	0	1
NCBI	Australia	'LR812709_Australia_New_South_Wales_Beaumont_Hills'	E	Oceania	0	0	0	1
NCBI	Australia	'LR812710_Australia_New_South_Wales_Wyoming'	A	Oceania	0	0	0	1
NCBI	Kenya	'LR812711_Kenya_Nairobi_Nairobi'	C	Africa	0	0	0	1
NCBI	Kenya	'LR812712_Kenya_Nairobi_Nairobi'	C	Africa	0	0	0	1
NCBI	Spain	'LR812713_Spain_Alicante_Alicante'	C	Europe	0	0	0	1
NCBI	Switzerland	'LR812714_Switzerland_Laufenburg_Frick'	39	Europe	0	0	0	1
NCBI	Switzerland	'LR812715_Switzerland_Laufenburg_Frick'	F	Europe	0	0	0	1
NCBI	SouthAfrica	'LR812716_South_Africa_Western_Cape_Cape_Town'	C	Africa	0	0	0	1
NCBI	SouthAfrica	'LR812717_South_Africa_Western_Cape_Cape_Town'	C	Africa	0	0	0	1
NCBI	SouthAfrica	'LR812718_South_Africa_KwaZulu_Natal_Durban'	C	Africa	0	0	0	1
NCBI	SouthAfrica	'LR812719_South_Africa_KwaZulu_Natal_Durban'	C	Africa	0	0	0	1
NCBI	USA	'LR812720_USA_Texas_College_Station'	C	NorthAmerica	0	0	0	1
Bold	Pakistan	'MADIP052_10_Hermetia_Pakistan_Azad_Kashmir'	E	Asia	0	0	0	1
Bold	Pakistan	'MADIP447_11_Hermetia_Pakistan_'	E	Asia	0	0	0	1
Bold	Pakistan	'MADIP448_11_Hermetia_Pakistan_'	E	Asia	0	0	0	1
Bold	Pakistan	'MADIP449_11_Hermetia_Pakistan_'	E	Asia	0	0	0	1
Bold	Malaysia	'MBPT075_15_Hermetia_Malaysia_Selangor'	A	Asia	0	0	0	1
NCBI	Portugal	'MN868749_Portugal_Porto_Vila_Nova_de_Gaia_Parque_das_Tilias__Seixezelo'	C	Europe	0	0	0	1
NCBI	Portugal	'MN868751_Portugal_Braga_Barcelos_Gilmonde'	G	Europe	0	0	0	1
NCBI	Portugal	'MN868766_Portugal_Braganca_Alfandega_da_Fe_Alfandega_da_Fe'	C	Europe	0	0	0	1
NCBI	Portugal	'MN868787_Portugal'	C	Europe	0	0	0	1
NCBI	Malaysia	'MT908920_Malaysia'	E	Asia	0	0	0	1
Bold	USA	'NBINS789_16_Hermetia_United_States_California'	38	NorthAmerica	0	0	0	1
Bold	USA	'NBINS965_17_Hermetia_United_States_California'	38	NorthAmerica	0	0	0	1
NCBI	China	'NC_035232_CO1_China'	C	Asia	0	0	0	1	1 China
Bold	Australia	'NSWHP4133_19_Hermetia_Australia_New_South_Wales'	A	Oceania	0	0	0	1
Bold	Australia	'NSWHP4134_19_Hermetia_Australia_New_South_Wales'	A	Oceania	0	0	0	1
Bold	USA	'OUDP145_09_Hermetia_United_States_Oklahoma'	C	NorthAmerica	0	0	0	1
Bold	PapuaNewGuinea	'PNGFF145_11_Hermetia_Papua_New_Guinea_Madang'	A	Oceania	0	0	0	1
Bold	PapuaNewGuinea	'PNGFF146_11_Hermetia_Papua_New_Guinea_Madang'	A	Oceania	0	0	0	1
Bold	PapuaNewGuinea	'PNGFF147_11_Hermetia_Papua_New_Guinea_Madang'	A	Oceania	0	0	0	1
Bold	PapuaNewGuinea	'PNGFF148_11_Hermetia_Papua_New_Guinea_Madang'	A	Oceania	0	0	0	1
Bold	PapuaNewGuinea	'PNGFF150_11_Hermetia_Papua_New_Guinea_Madang'	A	Oceania	0	0	0	1
Bold	PapuaNewGuinea	'PNGFF153_11_Hermetia_Papua_New_Guinea_Madang'	A	Oceania	0	0	0	1
Bold	FrenchPolynesia	'SYC1218_14_Hermetia_French_Polynesia_'	A	Oceania	0	0	0	1
Bold	FrenchPolynesia	'SYC3951_14_Hermetia_French_Polynesia_'	A	Oceania	0	0	0	1
Bold	USA	'USDIP376_09_Hermetia_United_States_Texas'	41	NorthAmerica	0	0	0	1
	France	Avb	C	Europe	1	1		0
	France	Avc	C	Europe	1	1		0
	France	Avd	E	Europe	1	1		0
	France	Ave	B	Europe	1	1		0
	France	Avf	C	Europe	1	1		0
					114	23	91	563
