# Supplementary material for: The Natural History of the Black Soldier Fly, Hermetia Illucens: Insights From Complete Mitochondrial Genome Sequences
Source: Research Square preprint supplement (doi:10.21203/rs.3.rs-1250528/v1), 2022-02-11
Supplement: Supplementary file 1 [file 4ecdbfc7d685c7a1b9d55f4c.pdf]

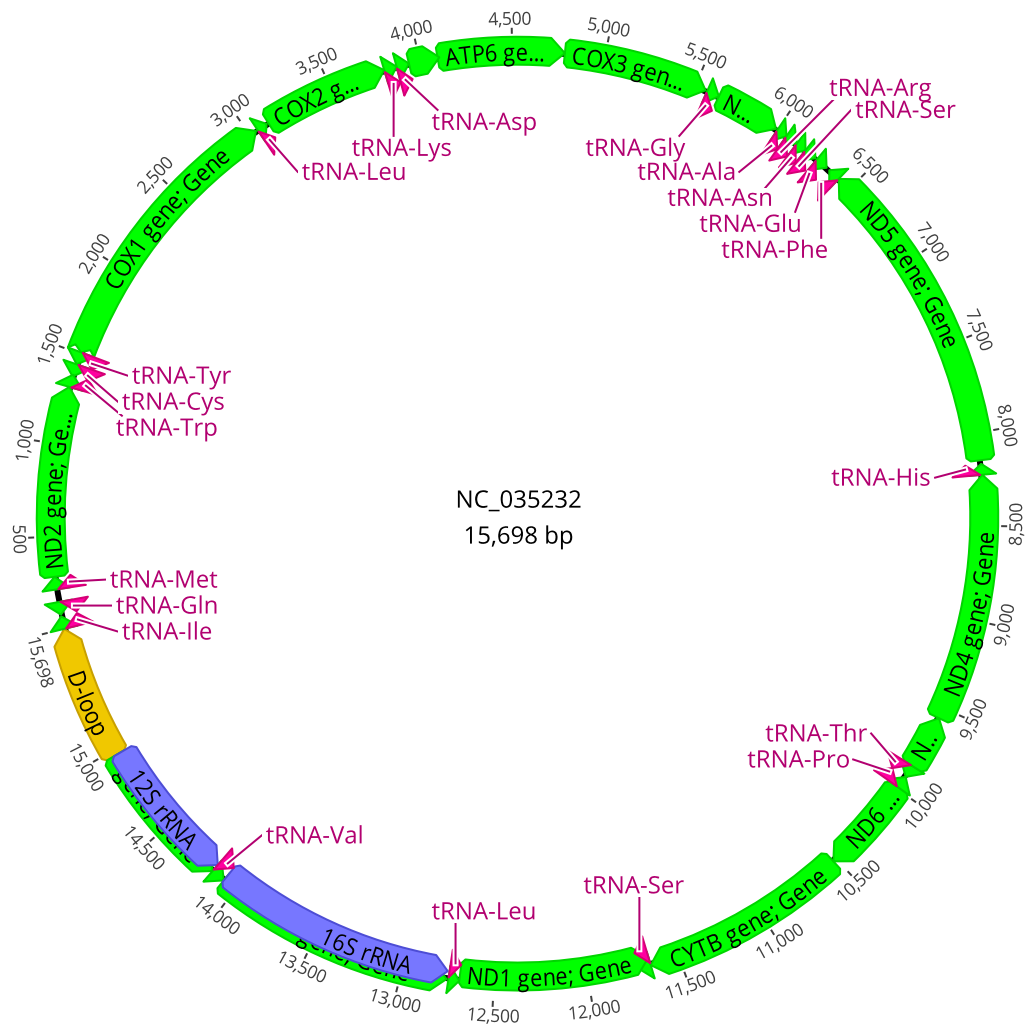

## Annotated mitochondrial genome of *Hermetia illucens*

The annotation of the genome was carried out using the MITOS tool.

Visualisation was carried out using the Geneious software.
