# Supplementary material for: The Natural History of the Black Soldier Fly, Hermetia Illucens: Insights From Complete Mitochondrial Genome Sequences
Source: Research Square preprint supplement (doi:10.21203/rs.3.rs-1250528/v1), 2022-02-11
Supplement: Supplementary file 3 [file 12c32023dd00200566b4c4d5.xlsx]

## Sheet: Feuille 1
Paired blasts of the mitochondrial genomes used in the study
query	subject	% identity	lenght	mismatch	gapopen	qstart	qend	Sstart	Send	E value	bit score
a10_F_Avignon	a10_F_Avignon	100.000	13846	0	0	1	13846	1	13846	0.0	25569
a10_F_Avignon	a11_F_Angouleme	96.392	13776	478	12	1	13774	1	13759	0.0	22668
a10_F_Avignon	a12_F_Angouleme	99.682	13846	44	0	1	13846	31	13876	0.0	25326
a10_F_Avignon	a13_F_Trescleoux	96.396	13846	481	12	1	13846	31	13858	0.0	22788
a10_F_Avignon	a14_F_Dieulefit	96.393	13834	481	12	1	13834	31	13846	0.0	22766
a10_F_Avignon	a15_Mexique	96.539	13839	450	18	1	13833	31	13846	0.0	22875
a10_F_Avignon	a16_Guyane	96.411	13847	478	12	1	13846	31	13859	0.0	22799
a10_F_Avignon	a17_Guyane	96.411	13847	478	12	1	13846	31	13859	0.0	22799
a10_F_Avignon	a18_Guyane	96.407	13834	478	12	1	13833	31	13846	0.0	22775
a10_F_Avignon	a19_Ghana_2	99.993	13730	1	0	1	13730	31	13760	0.0	25350
a10_F_Avignon	a1_Ghana	99.993	13816	1	0	1	13816	31	13846	0.0	25508
a10_F_Avignon	a20_Ghana_2	99.993	13730	1	0	1	13730	31	13760	0.0	25350
a10_F_Avignon	a21_Ghana_2	99.993	13816	1	0	1	13816	31	13846	0.0	25508
a10_F_Avignon	a22_Taiwan	100.000	13846	0	0	1	13846	31	13876	0.0	25569
a10_F_Avignon	a25_Kenya_ICIPE	100.000	13846	0	0	1	13846	31	13876	0.0	25569
a10_F_Avignon	a26_Kenya_ICIPE	99.616	13817	51	2	1	13816	31	13846	0.0	25220
a10_F_Avignon	a27_Kenya_ICIPE	100.000	13846	0	0	1	13846	31	13876	0.0	25569
a10_F_Avignon	a28_Kenya_Bondo	99.624	13817	50	2	1	13816	31	13846	0.0	25226
a10_F_Avignon	a29_F_Perigueux	96.396	13846	481	12	1	13846	31	13858	0.0	22788
a10_F_Avignon	a2_Ghana	99.993	13846	1	0	1	13846	31	13876	0.0	25564
a10_F_Avignon	a30_F_Champagne_au_mont_d_or	96.399	13747	478	11	1	13747	31	13760	0.0	22628
a10_F_Avignon	a31_F_Lyon	96.399	13747	478	11	1	13747	31	13760	0.0	22628
a10_F_Avignon	a32_F_Montpellier	96.396	13846	481	12	1	13846	31	13858	0.0	22788
a10_F_Avignon	a33_not_hermetia_F_Bayonne	80.778	13807	2330	255	181	13846	132	13755	0.0	10495
a10_F_Avignon	a33_not_hermetia_F_Bayonne	90.265	113	6	2	1	113	31	138	1.37e-35	143
a10_F_Avignon	a34_not_hermetia_F_Bayonne	80.778	13807	2330	255	181	13846	132	13755	0.0	10495
a10_F_Avignon	a34_not_hermetia_F_Bayonne	90.265	113	6	2	1	113	31	138	1.37e-35	143
a10_F_Avignon	a35_F_Lormont	96.389	13846	482	12	1	13846	31	13858	0.0	22783
a10_F_Avignon	a36_F_Lormont	96.396	13846	481	12	1	13846	31	13858	0.0	22788
a10_F_Avignon	a37_F_La_Force	96.396	13846	481	12	1	13846	31	13858	0.0	22788
a10_F_Avignon	a38_F_St_Georges_Les_Baiilargeaux	96.389	13846	482	12	1	13846	31	13858	0.0	22783
a10_F_Avignon	a39_F_Nogent_Sur_Marne	96.432	13846	476	10	1	13846	31	13858	0.0	22816
a10_F_Avignon	a3_Ghana	99.993	13816	1	0	1	13816	31	13846	0.0	25508
a10_F_Avignon	a40_F_Vincennes	96.429	13834	476	10	1	13834	31	13846	0.0	22794
a10_F_Avignon	a41_F_Paris	96.396	13846	481	12	1	13846	31	13858	0.0	22788
a10_F_Avignon	a43_F_La_Rochelle	96.400	13834	480	12	1	13834	31	13846	0.0	22772
a10_F_Avignon	a44_F_Poitiers	96.396	13846	481	12	1	13846	31	13858	0.0	22788
a10_F_Avignon	a45_F_Poitiers	96.389	13846	482	12	1	13846	31	13858	0.0	22783
a10_F_Avignon	a46_F_Poitiers	96.396	13846	481	12	1	13846	31	13858	0.0	22788
a10_F_Avignon	a47_F_Poitiers	96.396	13846	481	12	1	13846	31	13858	0.0	22788
a10_F_Avignon	a48_F_Colomiers	96.450	13748	470	11	1	13748	31	13760	0.0	22668
a10_F_Avignon	a49_F_Valloire_Sur_Cisse	96.396	13846	481	12	1	13846	31	13858	0.0	22788
a10_F_Avignon	a4_Taiwan	96.403	13846	480	12	1	13846	31	13858	0.0	22794
a10_F_Avignon	a50_F_Blois	96.396	13846	481	12	1	13846	31	13858	0.0	22788
a10_F_Avignon	a51_F_Blois	96.392	13747	479	11	1	13747	31	13760	0.0	22622
a10_F_Avignon	a52_F_Blois	96.397	13848	479	12	1	13846	31	13860	0.0	22790
a10_F_Avignon	a53_F_Blois	96.382	13846	483	12	1	13846	31	13858	0.0	22777
a10_F_Avignon	a54_F_St_Marcellin_En_Forez	96.399	13747	478	11	1	13747	31	13760	0.0	22628
a10_F_Avignon	a55_F_Lormont	96.392	13747	479	11	1	13747	31	13760	0.0	22622
a10_F_Avignon	a56_F_La_Rochelle	96.406	13747	477	11	1	13747	31	13760	0.0	22633
a10_F_Avignon	a57_F_Paris	96.385	13747	480	11	1	13747	31	13760	0.0	22617
a10_F_Avignon	a58_F_La_Rochelle	96.399	13747	478	11	1	13747	31	13760	0.0	22628
a10_F_Avignon	a59_F_Bayonne	80.778	13807	2330	255	181	13846	132	13755	0.0	10495
a10_F_Avignon	a59_F_Bayonne	90.265	113	6	2	1	113	31	138	1.37e-35	143
a10_F_Avignon	a7_Kenya_Bondo	99.624	13847	50	2	1	13846	1	13846	0.0	25281
a10_F_Avignon	a8_Taiwan	100.000	13846	0	0	1	13846	1	13846	0.0	25569
a10_F_Avignon	a9_Taiwan	100.000	13760	0	0	1	13760	1	13760	0.0	25411
a10_F_Avignon	ADF04_CF	99.993	13846	1	0	1	13846	31	13876	0.0	25564
a10_F_Avignon	AOM17_CF	99.986	13846	1	1	1	13846	31	13875	0.0	25556
a10_F_Avignon	Berkley_female	100.000	13846	0	0	1	13846	31	13876	0.0	25569
a10_F_Avignon	Berkley_male_	100.000	13846	0	0	1	13846	31	13876	0.0	25569
a10_F_Avignon	Mito_Uk_Cambridge	100.000	13846	0	0	1	13846	31	13876	0.0	25569
a10_F_Avignon	NC_035232_ref_China	100.000	13846	0	0	1	13846	31	13876	0.0	25569
a11_F_Angouleme	a10_F_Avignon	96.392	13776	478	12	1	13759	1	13774	0.0	22668
a11_F_Angouleme	a11_F_Angouleme	100.000	13760	0	0	1	13760	1	13760	0.0	25411
a11_F_Angouleme	a12_F_Angouleme	96.465	13776	468	12	1	13759	31	13804	0.0	22724
a11_F_Angouleme	a13_F_Trescleoux	99.985	13760	0	1	1	13760	31	13788	0.0	25398
a11_F_Angouleme	a14_F_Dieulefit	99.985	13760	0	1	1	13760	31	13788	0.0	25398
a11_F_Angouleme	a15_Mexique	97.792	13767	289	11	1	13760	31	13789	0.0	23725
a11_F_Angouleme	a16_Guyane	99.237	13761	102	2	1	13760	31	13789	0.0	24827
a11_F_Angouleme	a17_Guyane	99.237	13761	102	2	1	13760	31	13789	0.0	24827
a11_F_Angouleme	a18_Guyane	99.237	13761	102	2	1	13760	31	13789	0.0	24827
a11_F_Angouleme	a19_Ghana_2	96.373	13732	479	12	1	13715	31	13760	0.0	22581
a11_F_Angouleme	a1_Ghana	96.385	13776	479	12	1	13759	31	13804	0.0	22663
a11_F_Angouleme	a20_Ghana_2	96.373	13732	479	12	1	13715	31	13760	0.0	22581
a11_F_Angouleme	a21_Ghana_2	96.385	13776	479	12	1	13759	31	13804	0.0	22663
a11_F_Angouleme	a22_Taiwan	96.392	13776	478	12	1	13759	31	13804	0.0	22668
a11_F_Angouleme	a25_Kenya_ICIPE	96.392	13776	478	12	1	13759	31	13804	0.0	22668
a11_F_Angouleme	a26_Kenya_ICIPE	96.443	13777	469	13	1	13759	31	13804	0.0	22707
a11_F_Angouleme	a27_Kenya_ICIPE	96.392	13776	478	12	1	13759	31	13804	0.0	22668
a11_F_Angouleme	a28_Kenya_Bondo	96.451	13777	468	13	1	13759	31	13804	0.0	22713
a11_F_Angouleme	a29_F_Perigueux	99.985	13760	0	1	1	13760	31	13788	0.0	25398
a11_F_Angouleme	a2_Ghana	96.385	13776	479	12	1	13759	31	13804	0.0	22663
a11_F_Angouleme	a30_F_Champagne_au_mont_d_or	99.985	13732	0	1	1	13732	31	13760	0.0	25346
a11_F_Angouleme	a31_F_Lyon	99.978	13732	1	1	1	13732	31	13760	0.0	25340
a11_F_Angouleme	a32_F_Montpellier	99.985	13760	0	1	1	13760	31	13788	0.0	25398
a11_F_Angouleme	a33_not_hermetia_F_Bayonne	81.508	12616	2056	204	1266	13760	1224	13683	0.0	10117
a11_F_Angouleme	a34_not_hermetia_F_Bayonne	81.508	12616	2056	204	1266	13760	1224	13683	0.0	10117
a11_F_Angouleme	a35_F_Lormont	99.978	13760	1	1	1	13760	31	13788	0.0	25392
a11_F_Angouleme	a36_F_Lormont	99.985	13760	0	1	1	13760	31	13788	0.0	25398
a11_F_Angouleme	a37_F_La_Force	99.985	13760	0	1	1	13760	31	13788	0.0	25398
a11_F_Angouleme	a38_F_St_Georges_Les_Baiilargeaux	99.978	13760	1	1	1	13760	31	13788	0.0	25392
a11_F_Angouleme	a39_F_Nogent_Sur_Marne	99.288	13760	96	1	1	13760	31	13788	0.0	24866
a11_F_Angouleme	a3_Ghana	96.385	13776	479	12	1	13759	31	13804	0.0	22663
a11_F_Angouleme	a40_F_Vincennes	99.288	13760	96	1	1	13760	31	13788	0.0	24866
a11_F_Angouleme	a41_F_Paris	99.985	13760	0	1	1	13760	31	13788	0.0	25398
a11_F_Angouleme	a43_F_La_Rochelle	99.978	13760	1	1	1	13760	31	13788	0.0	25392
a11_F_Angouleme	a44_F_Poitiers	99.985	13760	0	1	1	13760	31	13788	0.0	25398
a11_F_Angouleme	a45_F_Poitiers	99.978	13760	1	1	1	13760	31	13788	0.0	25392
a11_F_Angouleme	a46_F_Poitiers	99.985	13760	0	1	1	13760	31	13788	0.0	25398
a11_F_Angouleme	a47_F_Poitiers	99.985	13760	0	1	1	13760	31	13788	0.0	25398
a11_F_Angouleme	a48_F_Colomiers	99.097	13733	121	2	1	13733	31	13760	0.0	24670
a11_F_Angouleme	a49_F_Valloire_Sur_Cisse	99.985	13760	0	1	1	13760	31	13788	0.0	25398
a11_F_Angouleme	a4_Taiwan	99.978	13760	1	1	1	13760	31	13788	0.0	25392
a11_F_Angouleme	a50_F_Blois	99.985	13760	0	1	1	13760	31	13788	0.0	25398
a11_F_Angouleme	a51_F_Blois	99.978	13732	1	1	1	13732	31	13760	0.0	25340
a11_F_Angouleme	a52_F_Blois	99.273	13762	96	2	1	13760	31	13790	0.0	24857
a11_F_Angouleme	a53_F_Blois	99.971	13760	2	1	1	13760	31	13788	0.0	25387
a11_F_Angouleme	a54_F_St_Marcellin_En_Forez	99.985	13732	0	1	1	13732	31	13760	0.0	25346
a11_F_Angouleme	a55_F_Lormont	99.978	13732	1	1	1	13732	31	13760	0.0	25340
a11_F_Angouleme	a56_F_La_Rochelle	99.978	13732	1	1	1	13732	31	13760	0.0	25340
a11_F_Angouleme	a57_F_Paris	99.971	13732	2	1	1	13732	31	13760	0.0	25335
a11_F_Angouleme	a58_F_La_Rochelle	99.985	13732	0	1	1	13732	31	13760	0.0	25346
a11_F_Angouleme	a59_F_Bayonne	81.508	12616	2056	204	1266	13760	1224	13683	0.0	10117
a11_F_Angouleme	a7_Kenya_Bondo	96.451	13777	468	13	1	13759	1	13774	0.0	22713
a11_F_Angouleme	a8_Taiwan	96.392	13776	478	12	1	13759	1	13774	0.0	22668
a11_F_Angouleme	a9_Taiwan	96.389	13762	478	12	1	13745	1	13760	0.0	22642
a11_F_Angouleme	ADF04_CF	96.385	13776	479	12	1	13759	31	13804	0.0	22663
a11_F_Angouleme	AOM17_CF	96.378	13776	479	13	1	13759	31	13803	0.0	22657
a11_F_Angouleme	Berkley_female	96.392	13776	478	12	1	13759	31	13804	0.0	22668
a11_F_Angouleme	Berkley_male_	96.392	13776	478	12	1	13759	31	13804	0.0	22668
a11_F_Angouleme	Mito_Uk_Cambridge	96.392	13776	478	12	1	13759	31	13804	0.0	22668
a11_F_Angouleme	NC_035232_ref_China	96.392	13776	478	12	1	13759	31	13804	0.0	22668
a12_F_Angouleme	a10_F_Avignon	99.682	13846	44	0	31	13876	1	13846	0.0	25326
a12_F_Angouleme	a11_F_Angouleme	96.465	13776	468	12	31	13804	1	13759	0.0	22724
a12_F_Angouleme	a12_F_Angouleme	100.000	13900	0	0	1	13900	1	13900	0.0	25669
a12_F_Angouleme	a13_F_Trescleoux	96.482	13900	471	12	1	13900	1	13882	0.0	22943
a12_F_Angouleme	a14_F_Dieulefit	96.473	13864	471	12	1	13864	1	13846	0.0	22877
a12_F_Angouleme	a15_Mexique	96.532	13869	452	18	1	13863	1	13846	0.0	22919
a12_F_Angouleme	a16_Guyane	96.482	13901	470	12	1	13900	1	13883	0.0	22943
a12_F_Angouleme	a17_Guyane	96.482	13901	470	12	1	13900	1	13883	0.0	22943
a12_F_Angouleme	a18_Guyane	96.473	13864	470	12	1	13863	1	13846	0.0	22875
a12_F_Angouleme	a19_Ghana_2	99.673	13760	45	0	1	13760	1	13760	0.0	25161
a12_F_Angouleme	a1_Ghana	99.675	13846	45	0	1	13846	1	13846	0.0	25320
a12_F_Angouleme	a20_Ghana_2	99.673	13760	45	0	1	13760	1	13760	0.0	25161
a12_F_Angouleme	a21_Ghana_2	99.675	13846	45	0	1	13846	1	13846	0.0	25320
a12_F_Angouleme	a22_Taiwan	99.683	13900	44	0	1	13900	1	13900	0.0	25425
a12_F_Angouleme	a25_Kenya_ICIPE	99.683	13900	44	0	1	13900	1	13900	0.0	25425
a12_F_Angouleme	a26_Kenya_ICIPE	99.733	13847	35	2	1	13846	1	13846	0.0	25364
a12_F_Angouleme	a27_Kenya_ICIPE	99.683	13900	44	0	1	13900	1	13900	0.0	25425
a12_F_Angouleme	a28_Kenya_Bondo	99.740	13847	34	2	1	13846	1	13846	0.0	25370
a12_F_Angouleme	a29_F_Perigueux	96.482	13900	471	12	1	13900	1	13882	0.0	22943
a12_F_Angouleme	a2_Ghana	99.676	13900	45	0	1	13900	1	13900	0.0	25420
a12_F_Angouleme	a30_F_Champagne_au_mont_d_or	96.480	13777	468	11	1	13777	1	13760	0.0	22738
a12_F_Angouleme	a31_F_Lyon	96.480	13777	468	11	1	13777	1	13760	0.0	22738
a12_F_Angouleme	a32_F_Montpellier	96.482	13900	471	12	1	13900	1	13882	0.0	22943
a12_F_Angouleme	a33_not_hermetia_F_Bayonne	80.753	13831	2336	258	211	13899	132	13778	0.0	10493
a12_F_Angouleme	a33_not_hermetia_F_Bayonne	91.608	143	7	2	1	143	1	138	1.35e-50	193
a12_F_Angouleme	a34_not_hermetia_F_Bayonne	80.753	13831	2336	258	211	13899	132	13778	0.0	10493
a12_F_Angouleme	a34_not_hermetia_F_Bayonne	91.608	143	7	2	1	143	1	138	1.35e-50	193
a12_F_Angouleme	a35_F_Lormont	96.475	13900	472	12	1	13900	1	13882	0.0	22938
a12_F_Angouleme	a36_F_Lormont	96.482	13900	471	12	1	13900	1	13882	0.0	22943
a12_F_Angouleme	a37_F_La_Force	96.482	13900	471	12	1	13900	1	13882	0.0	22943
a12_F_Angouleme	a38_F_St_Georges_Les_Baiilargeaux	96.475	13900	472	12	1	13900	1	13882	0.0	22938
a12_F_Angouleme	a39_F_Nogent_Sur_Marne	96.489	13900	470	10	1	13900	1	13882	0.0	22949
a12_F_Angouleme	a3_Ghana	99.675	13846	45	0	1	13846	1	13846	0.0	25320
a12_F_Angouleme	a40_F_Vincennes	96.480	13864	470	10	1	13864	1	13846	0.0	22882
a12_F_Angouleme	a41_F_Paris	96.482	13900	471	12	1	13900	1	13882	0.0	22943
a12_F_Angouleme	a43_F_La_Rochelle	96.480	13864	470	12	1	13864	1	13846	0.0	22882
a12_F_Angouleme	a44_F_Poitiers	96.482	13900	471	12	1	13900	1	13882	0.0	22943
a12_F_Angouleme	a45_F_Poitiers	96.475	13900	472	12	1	13900	1	13882	0.0	22938
a12_F_Angouleme	a46_F_Poitiers	96.482	13900	471	12	1	13900	1	13882	0.0	22943
a12_F_Angouleme	a47_F_Poitiers	96.482	13900	471	12	1	13900	1	13882	0.0	22943
a12_F_Angouleme	a48_F_Colomiers	96.531	13778	460	11	1	13778	1	13760	0.0	22779
a12_F_Angouleme	a49_F_Valloire_Sur_Cisse	96.482	13900	471	12	1	13900	1	13882	0.0	22943
a12_F_Angouleme	a4_Taiwan	96.489	13900	470	12	1	13900	1	13882	0.0	22949
a12_F_Angouleme	a50_F_Blois	96.482	13900	471	12	1	13900	1	13882	0.0	22943
a12_F_Angouleme	a51_F_Blois	96.472	13777	469	11	1	13777	1	13760	0.0	22733
a12_F_Angouleme	a52_F_Blois	96.483	13902	469	12	1	13900	1	13884	0.0	22945
a12_F_Angouleme	a53_F_Blois	96.468	13900	473	12	1	13900	1	13882	0.0	22932
a12_F_Angouleme	a54_F_St_Marcellin_En_Forez	96.480	13777	468	11	1	13777	1	13760	0.0	22738
a12_F_Angouleme	a55_F_Lormont	96.472	13777	469	11	1	13777	1	13760	0.0	22733
a12_F_Angouleme	a56_F_La_Rochelle	96.487	13777	467	11	1	13777	1	13760	0.0	22744
a12_F_Angouleme	a57_F_Paris	96.465	13777	470	11	1	13777	1	13760	0.0	22727
a12_F_Angouleme	a58_F_La_Rochelle	96.480	13777	468	11	1	13777	1	13760	0.0	22738
a12_F_Angouleme	a59_F_Bayonne	80.753	13831	2336	258	211	13899	132	13778	0.0	10493
a12_F_Angouleme	a59_F_Bayonne	91.608	143	7	2	1	143	1	138	1.35e-50	193
a12_F_Angouleme	a7_Kenya_Bondo	99.740	13847	34	2	31	13876	1	13846	0.0	25370
a12_F_Angouleme	a8_Taiwan	99.682	13846	44	0	31	13876	1	13846	0.0	25326
a12_F_Angouleme	a9_Taiwan	99.680	13760	44	0	31	13790	1	13760	0.0	25167
a12_F_Angouleme	ADF04_CF	99.676	13900	45	0	1	13900	1	13900	0.0	25420
a12_F_Angouleme	AOM17_CF	99.669	13900	45	1	1	13900	1	13899	0.0	25412
a12_F_Angouleme	Berkley_female	99.683	13900	44	0	1	13900	1	13900	0.0	25425
a12_F_Angouleme	Berkley_male_	99.683	13900	44	0	1	13900	1	13900	0.0	25425
a12_F_Angouleme	Mito_Uk_Cambridge	99.683	13900	44	0	1	13900	1	13900	0.0	25425
a12_F_Angouleme	NC_035232_ref_China	99.683	13900	44	0	1	13900	1	13900	0.0	25425
a13_F_Trescleoux	a10_F_Avignon	96.396	13846	481	12	31	13858	1	13846	0.0	22788
a13_F_Trescleoux	a11_F_Angouleme	99.985	13760	0	1	31	13788	1	13760	0.0	25398
a13_F_Trescleoux	a12_F_Angouleme	96.482	13900	471	12	1	13882	1	13900	0.0	22943
a13_F_Trescleoux	a13_F_Trescleoux	100.000	13883	0	0	1	13883	1	13883	0.0	25638
a13_F_Trescleoux	a14_F_Dieulefit	100.000	13846	0	0	1	13846	1	13846	0.0	25569
a13_F_Trescleoux	a15_Mexique	97.820	13852	289	10	1	13845	1	13846	0.0	23894
a13_F_Trescleoux	a16_Guyane	99.258	13884	102	1	1	13883	1	13884	0.0	25067
a13_F_Trescleoux	a17_Guyane	99.258	13884	102	1	1	13883	1	13884	0.0	25067
a13_F_Trescleoux	a18_Guyane	99.256	13846	102	1	1	13845	1	13846	0.0	24997
a13_F_Trescleoux	a19_Ghana_2	96.395	13760	479	11	1	13743	1	13760	0.0	22646
a13_F_Trescleoux	a1_Ghana	96.389	13846	482	12	1	13828	1	13846	0.0	22783
a13_F_Trescleoux	a20_Ghana_2	96.395	13760	479	11	1	13743	1	13760	0.0	22646
a13_F_Trescleoux	a21_Ghana_2	96.389	13846	482	12	1	13828	1	13846	0.0	22783
a13_F_Trescleoux	a22_Taiwan	96.410	13900	481	12	1	13882	1	13900	0.0	22888
a13_F_Trescleoux	a25_Kenya_ICIPE	96.410	13900	481	12	1	13882	1	13900	0.0	22888
a13_F_Trescleoux	a26_Kenya_ICIPE	96.447	13847	472	13	1	13828	1	13846	0.0	22827
a13_F_Trescleoux	a27_Kenya_ICIPE	96.410	13900	481	12	1	13882	1	13900	0.0	22888
a13_F_Trescleoux	a28_Kenya_Bondo	96.454	13847	471	13	1	13828	1	13846	0.0	22833
a13_F_Trescleoux	a29_F_Perigueux	100.000	13883	0	0	1	13883	1	13883	0.0	25638
a13_F_Trescleoux	a2_Ghana	96.403	13900	482	12	1	13882	1	13900	0.0	22882
a13_F_Trescleoux	a30_F_Champagne_au_mont_d_or	100.000	13760	0	0	1	13760	1	13760	0.0	25411
a13_F_Trescleoux	a31_F_Lyon	99.993	13760	1	0	1	13760	1	13760	0.0	25405
a13_F_Trescleoux	a32_F_Montpellier	100.000	13883	0	0	1	13883	1	13883	0.0	25638
a13_F_Trescleoux	a33_not_hermetia_F_Bayonne	81.533	12709	2070	204	1296	13881	1224	13778	0.0	10211
a13_F_Trescleoux	a34_not_hermetia_F_Bayonne	81.533	12709	2070	204	1296	13881	1224	13778	0.0	10211
a13_F_Trescleoux	a35_F_Lormont	99.993	13883	1	0	1	13883	1	13883	0.0	25632
a13_F_Trescleoux	a36_F_Lormont	100.000	13883	0	0	1	13883	1	13883	0.0	25638
a13_F_Trescleoux	a37_F_La_Force	100.000	13883	0	0	1	13883	1	13883	0.0	25638
a13_F_Trescleoux	a38_F_St_Georges_Les_Baiilargeaux	99.993	13883	1	0	1	13883	1	13883	0.0	25632
a13_F_Trescleoux	a39_F_Nogent_Sur_Marne	99.309	13883	96	0	1	13883	1	13883	0.0	25106
a13_F_Trescleoux	a3_Ghana	96.389	13846	482	12	1	13828	1	13846	0.0	22783
a13_F_Trescleoux	a40_F_Vincennes	99.307	13846	96	0	1	13846	1	13846	0.0	25037
a13_F_Trescleoux	a41_F_Paris	100.000	13883	0	0	1	13883	1	13883	0.0	25638
a13_F_Trescleoux	a43_F_La_Rochelle	99.993	13846	1	0	1	13846	1	13846	0.0	25564
a13_F_Trescleoux	a44_F_Poitiers	100.000	13883	0	0	1	13883	1	13883	0.0	25638
a13_F_Trescleoux	a45_F_Poitiers	99.993	13883	1	0	1	13883	1	13883	0.0	25632
a13_F_Trescleoux	a46_F_Poitiers	100.000	13883	0	0	1	13883	1	13883	0.0	25638
a13_F_Trescleoux	a47_F_Poitiers	100.000	13883	0	0	1	13883	1	13883	0.0	25638
a13_F_Trescleoux	a48_F_Colomiers	99.113	13761	121	1	1	13761	1	13760	0.0	24735
a13_F_Trescleoux	a49_F_Valloire_Sur_Cisse	100.000	13883	0	0	1	13883	1	13883	0.0	25638
a13_F_Trescleoux	a4_Taiwan	99.993	13883	1	0	1	13883	1	13883	0.0	25632
a13_F_Trescleoux	a50_F_Blois	100.000	13883	0	0	1	13883	1	13883	0.0	25638
a13_F_Trescleoux	a51_F_Blois	99.993	13760	1	0	1	13760	1	13760	0.0	25405
a13_F_Trescleoux	a52_F_Blois	99.294	13885	96	1	1	13883	1	13885	0.0	25097
a13_F_Trescleoux	a53_F_Blois	99.986	13883	2	0	1	13883	1	13883	0.0	25627
a13_F_Trescleoux	a54_F_St_Marcellin_En_Forez	100.000	13760	0	0	1	13760	1	13760	0.0	25411
a13_F_Trescleoux	a55_F_Lormont	99.993	13760	1	0	1	13760	1	13760	0.0	25405
a13_F_Trescleoux	a56_F_La_Rochelle	99.993	13760	1	0	1	13760	1	13760	0.0	25405
a13_F_Trescleoux	a57_F_Paris	99.985	13760	2	0	1	13760	1	13760	0.0	25399
a13_F_Trescleoux	a58_F_La_Rochelle	100.000	13760	0	0	1	13760	1	13760	0.0	25411
a13_F_Trescleoux	a59_F_Bayonne	81.533	12709	2070	204	1296	13881	1224	13778	0.0	10211
a13_F_Trescleoux	a7_Kenya_Bondo	96.454	13847	471	13	31	13858	1	13846	0.0	22833
a13_F_Trescleoux	a8_Taiwan	96.396	13846	481	12	31	13858	1	13846	0.0	22788
a13_F_Trescleoux	a9_Taiwan	96.403	13760	478	11	31	13773	1	13760	0.0	22652
a13_F_Trescleoux	ADF04_CF	96.403	13900	482	12	1	13882	1	13900	0.0	22882
a13_F_Trescleoux	AOM17_CF	96.396	13900	482	13	1	13882	1	13899	0.0	22875
a13_F_Trescleoux	Berkley_female	96.410	13900	481	12	1	13882	1	13900	0.0	22888
a13_F_Trescleoux	Berkley_male_	96.410	13900	481	12	1	13882	1	13900	0.0	22888
a13_F_Trescleoux	Mito_Uk_Cambridge	96.410	13900	481	12	1	13882	1	13900	0.0	22888
a13_F_Trescleoux	NC_035232_ref_China	96.410	13900	481	12	1	13882	1	13900	0.0	22888
a14_F_Dieulefit	a10_F_Avignon	96.393	13834	481	12	31	13846	1	13834	0.0	22766
a14_F_Dieulefit	a11_F_Angouleme	99.985	13760	0	1	31	13788	1	13760	0.0	25398
a14_F_Dieulefit	a12_F_Angouleme	96.473	13864	471	12	1	13846	1	13864	0.0	22877
a14_F_Dieulefit	a13_F_Trescleoux	100.000	13846	0	0	1	13846	1	13846	0.0	25569
a14_F_Dieulefit	a14_F_Dieulefit	100.000	13846	0	0	1	13846	1	13846	0.0	25569
a14_F_Dieulefit	a15_Mexique	97.820	13852	289	10	1	13845	1	13846	0.0	23894
a14_F_Dieulefit	a16_Guyane	99.256	13847	102	1	1	13846	1	13847	0.0	24999
a14_F_Dieulefit	a17_Guyane	99.256	13847	102	1	1	13846	1	13847	0.0	24999
a14_F_Dieulefit	a18_Guyane	99.256	13846	102	1	1	13845	1	13846	0.0	24997
a14_F_Dieulefit	a19_Ghana_2	96.395	13760	479	11	1	13743	1	13760	0.0	22646
a14_F_Dieulefit	a1_Ghana	96.389	13846	482	12	1	13828	1	13846	0.0	22783
a14_F_Dieulefit	a20_Ghana_2	96.395	13760	479	11	1	13743	1	13760	0.0	22646
a14_F_Dieulefit	a21_Ghana_2	96.389	13846	482	12	1	13828	1	13846	0.0	22783
a14_F_Dieulefit	a22_Taiwan	96.401	13864	481	12	1	13846	1	13864	0.0	22822
a14_F_Dieulefit	a25_Kenya_ICIPE	96.401	13864	481	12	1	13846	1	13864	0.0	22822
a14_F_Dieulefit	a26_Kenya_ICIPE	96.447	13847	472	13	1	13828	1	13846	0.0	22827
a14_F_Dieulefit	a27_Kenya_ICIPE	96.401	13864	481	12	1	13846	1	13864	0.0	22822
a14_F_Dieulefit	a28_Kenya_Bondo	96.454	13847	471	13	1	13828	1	13846	0.0	22833
a14_F_Dieulefit	a29_F_Perigueux	100.000	13846	0	0	1	13846	1	13846	0.0	25569
a14_F_Dieulefit	a2_Ghana	96.394	13864	482	12	1	13846	1	13864	0.0	22816
a14_F_Dieulefit	a30_F_Champagne_au_mont_d_or	100.000	13760	0	0	1	13760	1	13760	0.0	25411
a14_F_Dieulefit	a31_F_Lyon	99.993	13760	1	0	1	13760	1	13760	0.0	25405
a14_F_Dieulefit	a32_F_Montpellier	100.000	13846	0	0	1	13846	1	13846	0.0	25569
a14_F_Dieulefit	a33_not_hermetia_F_Bayonne	81.518	12672	2065	204	1296	13844	1224	13741	0.0	10170
a14_F_Dieulefit	a34_not_hermetia_F_Bayonne	81.518	12672	2065	204	1296	13844	1224	13741	0.0	10170
a14_F_Dieulefit	a35_F_Lormont	99.993	13846	1	0	1	13846	1	13846	0.0	25564
a14_F_Dieulefit	a36_F_Lormont	100.000	13846	0	0	1	13846	1	13846	0.0	25569
a14_F_Dieulefit	a37_F_La_Force	100.000	13846	0	0	1	13846	1	13846	0.0	25569
a14_F_Dieulefit	a38_F_St_Georges_Les_Baiilargeaux	99.993	13846	1	0	1	13846	1	13846	0.0	25564
a14_F_Dieulefit	a39_F_Nogent_Sur_Marne	99.307	13846	96	0	1	13846	1	13846	0.0	25037
a14_F_Dieulefit	a3_Ghana	96.389	13846	482	12	1	13828	1	13846	0.0	22783
a14_F_Dieulefit	a40_F_Vincennes	99.307	13846	96	0	1	13846	1	13846	0.0	25037
a14_F_Dieulefit	a41_F_Paris	100.000	13846	0	0	1	13846	1	13846	0.0	25569
a14_F_Dieulefit	a43_F_La_Rochelle	99.993	13846	1	0	1	13846	1	13846	0.0	25564
a14_F_Dieulefit	a44_F_Poitiers	100.000	13846	0	0	1	13846	1	13846	0.0	25569
a14_F_Dieulefit	a45_F_Poitiers	99.993	13846	1	0	1	13846	1	13846	0.0	25564
a14_F_Dieulefit	a46_F_Poitiers	100.000	13846	0	0	1	13846	1	13846	0.0	25569
a14_F_Dieulefit	a47_F_Poitiers	100.000	13846	0	0	1	13846	1	13846	0.0	25569
a14_F_Dieulefit	a48_F_Colomiers	99.113	13761	121	1	1	13761	1	13760	0.0	24735
a14_F_Dieulefit	a49_F_Valloire_Sur_Cisse	100.000	13846	0	0	1	13846	1	13846	0.0	25569
a14_F_Dieulefit	a4_Taiwan	99.993	13846	1	0	1	13846	1	13846	0.0	25564
a14_F_Dieulefit	a50_F_Blois	100.000	13846	0	0	1	13846	1	13846	0.0	25569
a14_F_Dieulefit	a51_F_Blois	99.993	13760	1	0	1	13760	1	13760	0.0	25405
a14_F_Dieulefit	a52_F_Blois	99.292	13848	96	1	1	13846	1	13848	0.0	25028
a14_F_Dieulefit	a53_F_Blois	99.986	13846	2	0	1	13846	1	13846	0.0	25558
a14_F_Dieulefit	a54_F_St_Marcellin_En_Forez	100.000	13760	0	0	1	13760	1	13760	0.0	25411
a14_F_Dieulefit	a55_F_Lormont	99.993	13760	1	0	1	13760	1	13760	0.0	25405
a14_F_Dieulefit	a56_F_La_Rochelle	99.993	13760	1	0	1	13760	1	13760	0.0	25405
a14_F_Dieulefit	a57_F_Paris	99.985	13760	2	0	1	13760	1	13760	0.0	25399
a14_F_Dieulefit	a58_F_La_Rochelle	100.000	13760	0	0	1	13760	1	13760	0.0	25411
a14_F_Dieulefit	a59_F_Bayonne	81.518	12672	2065	204	1296	13844	1224	13741	0.0	10170
a14_F_Dieulefit	a7_Kenya_Bondo	96.451	13835	471	13	31	13846	1	13834	0.0	22810
a14_F_Dieulefit	a8_Taiwan	96.393	13834	481	12	31	13846	1	13834	0.0	22766
a14_F_Dieulefit	a9_Taiwan	96.403	13760	478	11	31	13773	1	13760	0.0	22652
a14_F_Dieulefit	ADF04_CF	96.394	13864	482	12	1	13846	1	13864	0.0	22816
a14_F_Dieulefit	AOM17_CF	96.386	13864	482	13	1	13846	1	13863	0.0	22809
a14_F_Dieulefit	Berkley_female	96.401	13864	481	12	1	13846	1	13864	0.0	22822
a14_F_Dieulefit	Berkley_male_	96.401	13864	481	12	1	13846	1	13864	0.0	22822
a14_F_Dieulefit	Mito_Uk_Cambridge	96.401	13864	481	12	1	13846	1	13864	0.0	22822
a14_F_Dieulefit	NC_035232_ref_China	96.401	13864	481	12	1	13846	1	13864	0.0	22822
a15_Mexique	a10_F_Avignon	96.539	13839	450	18	31	13846	1	13833	0.0	22875
a15_Mexique	a11_F_Angouleme	97.792	13767	289	11	31	13789	1	13760	0.0	23725
a15_Mexique	a12_F_Angouleme	96.532	13869	452	18	1	13846	1	13863	0.0	22919
a15_Mexique	a13_F_Trescleoux	97.820	13852	289	10	1	13846	1	13845	0.0	23894
a15_Mexique	a14_F_Dieulefit	97.820	13852	289	10	1	13846	1	13845	0.0	23894
a15_Mexique	a15_Mexique	100.000	13846	0	0	1	13846	1	13846	0.0	25569
a15_Mexique	a16_Guyane	97.733	13853	300	11	1	13846	1	13846	0.0	23830
a15_Mexique	a17_Guyane	97.733	13853	300	11	1	13846	1	13846	0.0	23830
a15_Mexique	a18_Guyane	97.733	13853	300	11	1	13846	1	13846	0.0	23830
a15_Mexique	a19_Ghana_2	96.542	13766	448	17	1	13744	1	13760	0.0	22759
a15_Mexique	a1_Ghana	96.535	13852	451	18	1	13829	1	13846	0.0	22894
a15_Mexique	a20_Ghana_2	96.542	13766	448	17	1	13744	1	13760	0.0	22759
a15_Mexique	a21_Ghana_2	96.535	13852	451	18	1	13829	1	13846	0.0	22894
a15_Mexique	a22_Taiwan	96.546	13869	450	18	1	13846	1	13863	0.0	22930
a15_Mexique	a25_Kenya_ICIPE	96.546	13869	450	18	1	13846	1	13863	0.0	22930
a15_Mexique	a26_Kenya_ICIPE	96.485	13853	456	19	1	13829	1	13846	0.0	22855
a15_Mexique	a27_Kenya_ICIPE	96.546	13869	450	18	1	13846	1	13863	0.0	22930
a15_Mexique	a28_Kenya_Bondo	96.492	13853	455	19	1	13829	1	13846	0.0	22860
a15_Mexique	a29_F_Perigueux	97.820	13852	289	10	1	13846	1	13845	0.0	23894
a15_Mexique	a2_Ghana	96.539	13869	451	18	1	13846	1	13863	0.0	22925
a15_Mexique	a30_F_Champagne_au_mont_d_or	97.806	13767	289	10	1	13761	1	13760	0.0	23737
a15_Mexique	a31_F_Lyon	97.799	13767	290	10	1	13761	1	13760	0.0	23732
a15_Mexique	a32_F_Montpellier	97.820	13852	289	10	1	13846	1	13845	0.0	23894
a15_Mexique	a33_not_hermetia_F_Bayonne	80.649	13798	2335	260	197	13845	130	13741	0.0	10379
a15_Mexique	a34_not_hermetia_F_Bayonne	80.649	13798	2335	260	197	13845	130	13741	0.0	10379
a15_Mexique	a35_F_Lormont	97.813	13852	290	10	1	13846	1	13845	0.0	23889
a15_Mexique	a36_F_Lormont	97.820	13852	289	10	1	13846	1	13845	0.0	23894
a15_Mexique	a37_F_La_Force	97.820	13852	289	10	1	13846	1	13845	0.0	23894
a15_Mexique	a38_F_St_Georges_Les_Baiilargeaux	97.813	13852	290	10	1	13846	1	13845	0.0	23889
a15_Mexique	a39_F_Nogent_Sur_Marne	97.776	13852	295	10	1	13846	1	13845	0.0	23861
a15_Mexique	a3_Ghana	96.535	13852	451	18	1	13829	1	13846	0.0	22894
a15_Mexique	a40_F_Vincennes	97.776	13852	295	10	1	13846	1	13845	0.0	23861
a15_Mexique	a41_F_Paris	97.820	13852	289	10	1	13846	1	13845	0.0	23894
a15_Mexique	a43_F_La_Rochelle	97.827	13852	288	10	1	13846	1	13845	0.0	23900
a15_Mexique	a44_F_Poitiers	97.820	13852	289	10	1	13846	1	13845	0.0	23894
a15_Mexique	a45_F_Poitiers	97.813	13852	290	10	1	13846	1	13845	0.0	23889
a15_Mexique	a46_F_Poitiers	97.820	13852	289	10	1	13846	1	13845	0.0	23894
a15_Mexique	a47_F_Poitiers	97.820	13852	289	10	1	13846	1	13845	0.0	23894
a15_Mexique	a48_F_Colomiers	97.814	13768	287	11	1	13762	1	13760	0.0	23745
a15_Mexique	a49_F_Valloire_Sur_Cisse	97.820	13852	289	10	1	13846	1	13845	0.0	23894
a15_Mexique	a4_Taiwan	97.827	13852	288	10	1	13846	1	13845	0.0	23900
a15_Mexique	a50_F_Blois	97.820	13852	289	10	1	13846	1	13845	0.0	23894
a15_Mexique	a51_F_Blois	97.799	13767	290	10	1	13761	1	13760	0.0	23732
a15_Mexique	a52_F_Blois	97.770	13854	294	11	1	13846	1	13847	0.0	23857
a15_Mexique	a53_F_Blois	97.813	13853	288	12	1	13846	1	13845	0.0	23889
a15_Mexique	a54_F_St_Marcellin_En_Forez	97.806	13767	289	10	1	13761	1	13760	0.0	23737
a15_Mexique	a55_F_Lormont	97.799	13767	290	10	1	13761	1	13760	0.0	23732
a15_Mexique	a56_F_La_Rochelle	97.814	13767	288	10	1	13761	1	13760	0.0	23743
a15_Mexique	a57_F_Paris	97.792	13767	291	10	1	13761	1	13760	0.0	23726
a15_Mexique	a58_F_La_Rochelle	97.806	13767	289	10	1	13761	1	13760	0.0	23737
a15_Mexique	a59_F_Bayonne	80.649	13798	2335	260	197	13845	130	13741	0.0	10379
a15_Mexique	a7_Kenya_Bondo	96.488	13840	455	19	31	13846	1	13833	0.0	22836
a15_Mexique	a8_Taiwan	96.539	13839	450	18	31	13846	1	13833	0.0	22875
a15_Mexique	a9_Taiwan	96.549	13766	447	17	31	13774	1	13760	0.0	22764
a15_Mexique	ADF04_CF	96.539	13869	451	18	1	13846	1	13863	0.0	22925
a15_Mexique	AOM17_CF	96.532	13869	451	19	1	13846	1	13862	0.0	22919
a15_Mexique	Berkley_female	96.546	13869	450	18	1	13846	1	13863	0.0	22930
a15_Mexique	Berkley_male_	96.546	13869	450	18	1	13846	1	13863	0.0	22930
a15_Mexique	Mito_Uk_Cambridge	96.546	13869	450	18	1	13846	1	13863	0.0	22930
a15_Mexique	NC_035232_ref_China	96.546	13869	450	18	1	13846	1	13863	0.0	22930
a16_Guyane	a10_F_Avignon	96.411	13847	478	12	31	13859	1	13846	0.0	22799
a16_Guyane	a11_F_Angouleme	99.237	13761	102	2	31	13789	1	13760	0.0	24827
a16_Guyane	a12_F_Angouleme	96.482	13901	470	12	1	13883	1	13900	0.0	22943
a16_Guyane	a13_F_Trescleoux	99.258	13884	102	1	1	13884	1	13883	0.0	25067
a16_Guyane	a14_F_Dieulefit	99.256	13847	102	1	1	13847	1	13846	0.0	24999
a16_Guyane	a15_Mexique	97.733	13853	300	11	1	13846	1	13846	0.0	23830
a16_Guyane	a16_Guyane	100.000	13884	0	0	1	13884	1	13884	0.0	25640
a16_Guyane	a17_Guyane	100.000	13884	0	0	1	13884	1	13884	0.0	25640
a16_Guyane	a18_Guyane	100.000	13846	0	0	1	13846	1	13846	0.0	25569
a16_Guyane	a19_Ghana_2	96.410	13761	476	11	1	13744	1	13760	0.0	22659
a16_Guyane	a1_Ghana	96.404	13847	479	12	1	13829	1	13846	0.0	22794
a16_Guyane	a20_Ghana_2	96.410	13761	476	11	1	13744	1	13760	0.0	22659
a16_Guyane	a21_Ghana_2	96.404	13847	479	12	1	13829	1	13846	0.0	22794
a16_Guyane	a22_Taiwan	96.425	13901	478	12	1	13883	1	13900	0.0	22899
a16_Guyane	a25_Kenya_ICIPE	96.425	13901	478	12	1	13883	1	13900	0.0	22899
a16_Guyane	a26_Kenya_ICIPE	96.447	13848	471	13	1	13829	1	13846	0.0	22827
a16_Guyane	a27_Kenya_ICIPE	96.425	13901	478	12	1	13883	1	13900	0.0	22899
a16_Guyane	a28_Kenya_Bondo	96.454	13848	470	13	1	13829	1	13846	0.0	22833
a16_Guyane	a29_F_Perigueux	99.258	13884	102	1	1	13884	1	13883	0.0	25067
a16_Guyane	a2_Ghana	96.418	13901	479	12	1	13883	1	13900	0.0	22894
a16_Guyane	a30_F_Champagne_au_mont_d_or	99.252	13761	102	1	1	13761	1	13760	0.0	24840
a16_Guyane	a31_F_Lyon	99.244	13761	103	1	1	13761	1	13760	0.0	24834
a16_Guyane	a32_F_Montpellier	99.258	13884	102	1	1	13884	1	13883	0.0	25067
a16_Guyane	a33_not_hermetia_F_Bayonne	81.613	12710	2059	204	1296	13882	1224	13778	0.0	10268
a16_Guyane	a34_not_hermetia_F_Bayonne	81.613	12710	2059	204	1296	13882	1224	13778	0.0	10268
a16_Guyane	a35_F_Lormont	99.251	13884	103	1	1	13884	1	13883	0.0	25062
a16_Guyane	a36_F_Lormont	99.258	13884	102	1	1	13884	1	13883	0.0	25067
a16_Guyane	a37_F_La_Force	99.258	13884	102	1	1	13884	1	13883	0.0	25067
a16_Guyane	a38_F_St_Georges_Les_Baiilargeaux	99.251	13884	103	1	1	13884	1	13883	0.0	25062
a16_Guyane	a39_F_Nogent_Sur_Marne	99.575	13884	58	1	1	13884	1	13883	0.0	25311
a16_Guyane	a3_Ghana	96.404	13847	479	12	1	13829	1	13846	0.0	22794
a16_Guyane	a40_F_Vincennes	99.574	13847	58	1	1	13847	1	13846	0.0	25242
a16_Guyane	a41_F_Paris	99.258	13884	102	1	1	13884	1	13883	0.0	25067
a16_Guyane	a43_F_La_Rochelle	99.249	13847	103	1	1	13847	1	13846	0.0	24993
a16_Guyane	a44_F_Poitiers	99.258	13884	102	1	1	13884	1	13883	0.0	25067
a16_Guyane	a45_F_Poitiers	99.251	13884	103	1	1	13884	1	13883	0.0	25062
a16_Guyane	a46_F_Poitiers	99.258	13884	102	1	1	13884	1	13883	0.0	25067
a16_Guyane	a47_F_Poitiers	99.258	13884	102	1	1	13884	1	13883	0.0	25067
a16_Guyane	a48_F_Colomiers	98.939	13762	144	2	1	13762	1	13760	0.0	24604
a16_Guyane	a49_F_Valloire_Sur_Cisse	99.258	13884	102	1	1	13884	1	13883	0.0	25067
a16_Guyane	a4_Taiwan	99.251	13884	103	1	1	13884	1	13883	0.0	25062
a16_Guyane	a50_F_Blois	99.258	13884	102	1	1	13884	1	13883	0.0	25067
a16_Guyane	a51_F_Blois	99.244	13761	103	1	1	13761	1	13760	0.0	24834
a16_Guyane	a52_F_Blois	99.546	13886	60	2	1	13884	1	13885	0.0	25290
a16_Guyane	a53_F_Blois	99.244	13884	104	1	1	13884	1	13883	0.0	25056
a16_Guyane	a54_F_St_Marcellin_En_Forez	99.252	13761	102	1	1	13761	1	13760	0.0	24840
a16_Guyane	a55_F_Lormont	99.244	13761	103	1	1	13761	1	13760	0.0	24834
a16_Guyane	a56_F_La_Rochelle	99.244	13761	103	1	1	13761	1	13760	0.0	24834
a16_Guyane	a57_F_Paris	99.237	13761	104	1	1	13761	1	13760	0.0	24829
a16_Guyane	a58_F_La_Rochelle	99.252	13761	102	1	1	13761	1	13760	0.0	24840
a16_Guyane	a59_F_Bayonne	81.613	12710	2059	204	1296	13882	1224	13778	0.0	10268
a16_Guyane	a7_Kenya_Bondo	96.454	13848	470	13	31	13859	1	13846	0.0	22833
a16_Guyane	a8_Taiwan	96.411	13847	478	12	31	13859	1	13846	0.0	22799
a16_Guyane	a9_Taiwan	96.417	13761	475	11	31	13774	1	13760	0.0	22665
a16_Guyane	ADF04_CF	96.418	13901	479	12	1	13883	1	13900	0.0	22894
a16_Guyane	AOM17_CF	96.410	13901	479	13	1	13883	1	13899	0.0	22888
a16_Guyane	Berkley_female	96.425	13901	478	12	1	13883	1	13900	0.0	22899
a16_Guyane	Berkley_male_	96.425	13901	478	12	1	13883	1	13900	0.0	22899
a16_Guyane	Mito_Uk_Cambridge	96.425	13901	478	12	1	13883	1	13900	0.0	22899
a16_Guyane	NC_035232_ref_China	96.425	13901	478	12	1	13883	1	13900	0.0	22899
a17_Guyane	a10_F_Avignon	96.411	13847	478	12	31	13859	1	13846	0.0	22799
a17_Guyane	a11_F_Angouleme	99.237	13761	102	2	31	13789	1	13760	0.0	24827
a17_Guyane	a12_F_Angouleme	96.482	13901	470	12	1	13883	1	13900	0.0	22943
a17_Guyane	a13_F_Trescleoux	99.258	13884	102	1	1	13884	1	13883	0.0	25067
a17_Guyane	a14_F_Dieulefit	99.256	13847	102	1	1	13847	1	13846	0.0	24999
a17_Guyane	a15_Mexique	97.733	13853	300	11	1	13846	1	13846	0.0	23830
a17_Guyane	a16_Guyane	100.000	13884	0	0	1	13884	1	13884	0.0	25640
a17_Guyane	a17_Guyane	100.000	13884	0	0	1	13884	1	13884	0.0	25640
a17_Guyane	a18_Guyane	100.000	13846	0	0	1	13846	1	13846	0.0	25569
a17_Guyane	a19_Ghana_2	96.410	13761	476	11	1	13744	1	13760	0.0	22659
a17_Guyane	a1_Ghana	96.404	13847	479	12	1	13829	1	13846	0.0	22794
a17_Guyane	a20_Ghana_2	96.410	13761	476	11	1	13744	1	13760	0.0	22659
a17_Guyane	a21_Ghana_2	96.404	13847	479	12	1	13829	1	13846	0.0	22794
a17_Guyane	a22_Taiwan	96.425	13901	478	12	1	13883	1	13900	0.0	22899
a17_Guyane	a25_Kenya_ICIPE	96.425	13901	478	12	1	13883	1	13900	0.0	22899
a17_Guyane	a26_Kenya_ICIPE	96.447	13848	471	13	1	13829	1	13846	0.0	22827
a17_Guyane	a27_Kenya_ICIPE	96.425	13901	478	12	1	13883	1	13900	0.0	22899
a17_Guyane	a28_Kenya_Bondo	96.454	13848	470	13	1	13829	1	13846	0.0	22833
a17_Guyane	a29_F_Perigueux	99.258	13884	102	1	1	13884	1	13883	0.0	25067
a17_Guyane	a2_Ghana	96.418	13901	479	12	1	13883	1	13900	0.0	22894
a17_Guyane	a30_F_Champagne_au_mont_d_or	99.252	13761	102	1	1	13761	1	13760	0.0	24840
a17_Guyane	a31_F_Lyon	99.244	13761	103	1	1	13761	1	13760	0.0	24834
a17_Guyane	a32_F_Montpellier	99.258	13884	102	1	1	13884	1	13883	0.0	25067
a17_Guyane	a33_not_hermetia_F_Bayonne	81.613	12710	2059	204	1296	13882	1224	13778	0.0	10268
a17_Guyane	a34_not_hermetia_F_Bayonne	81.613	12710	2059	204	1296	13882	1224	13778	0.0	10268
a17_Guyane	a35_F_Lormont	99.251	13884	103	1	1	13884	1	13883	0.0	25062
a17_Guyane	a36_F_Lormont	99.258	13884	102	1	1	13884	1	13883	0.0	25067
a17_Guyane	a37_F_La_Force	99.258	13884	102	1	1	13884	1	13883	0.0	25067
a17_Guyane	a38_F_St_Georges_Les_Baiilargeaux	99.251	13884	103	1	1	13884	1	13883	0.0	25062
a17_Guyane	a39_F_Nogent_Sur_Marne	99.575	13884	58	1	1	13884	1	13883	0.0	25311
a17_Guyane	a3_Ghana	96.404	13847	479	12	1	13829	1	13846	0.0	22794
a17_Guyane	a40_F_Vincennes	99.574	13847	58	1	1	13847	1	13846	0.0	25242
a17_Guyane	a41_F_Paris	99.258	13884	102	1	1	13884	1	13883	0.0	25067
a17_Guyane	a43_F_La_Rochelle	99.249	13847	103	1	1	13847	1	13846	0.0	24993
a17_Guyane	a44_F_Poitiers	99.258	13884	102	1	1	13884	1	13883	0.0	25067
a17_Guyane	a45_F_Poitiers	99.251	13884	103	1	1	13884	1	13883	0.0	25062
a17_Guyane	a46_F_Poitiers	99.258	13884	102	1	1	13884	1	13883	0.0	25067
a17_Guyane	a47_F_Poitiers	99.258	13884	102	1	1	13884	1	13883	0.0	25067
a17_Guyane	a48_F_Colomiers	98.939	13762	144	2	1	13762	1	13760	0.0	24604
a17_Guyane	a49_F_Valloire_Sur_Cisse	99.258	13884	102	1	1	13884	1	13883	0.0	25067
a17_Guyane	a4_Taiwan	99.251	13884	103	1	1	13884	1	13883	0.0	25062
a17_Guyane	a50_F_Blois	99.258	13884	102	1	1	13884	1	13883	0.0	25067
a17_Guyane	a51_F_Blois	99.244	13761	103	1	1	13761	1	13760	0.0	24834
a17_Guyane	a52_F_Blois	99.546	13886	60	2	1	13884	1	13885	0.0	25290
a17_Guyane	a53_F_Blois	99.244	13884	104	1	1	13884	1	13883	0.0	25056
a17_Guyane	a54_F_St_Marcellin_En_Forez	99.252	13761	102	1	1	13761	1	13760	0.0	24840
a17_Guyane	a55_F_Lormont	99.244	13761	103	1	1	13761	1	13760	0.0	24834
a17_Guyane	a56_F_La_Rochelle	99.244	13761	103	1	1	13761	1	13760	0.0	24834
a17_Guyane	a57_F_Paris	99.237	13761	104	1	1	13761	1	13760	0.0	24829
a17_Guyane	a58_F_La_Rochelle	99.252	13761	102	1	1	13761	1	13760	0.0	24840
a17_Guyane	a59_F_Bayonne	81.613	12710	2059	204	1296	13882	1224	13778	0.0	10268
a17_Guyane	a7_Kenya_Bondo	96.454	13848	470	13	31	13859	1	13846	0.0	22833
a17_Guyane	a8_Taiwan	96.411	13847	478	12	31	13859	1	13846	0.0	22799
a17_Guyane	a9_Taiwan	96.417	13761	475	11	31	13774	1	13760	0.0	22665
a17_Guyane	ADF04_CF	96.418	13901	479	12	1	13883	1	13900	0.0	22894
a17_Guyane	AOM17_CF	96.410	13901	479	13	1	13883	1	13899	0.0	22888
a17_Guyane	Berkley_female	96.425	13901	478	12	1	13883	1	13900	0.0	22899
a17_Guyane	Berkley_male_	96.425	13901	478	12	1	13883	1	13900	0.0	22899
a17_Guyane	Mito_Uk_Cambridge	96.425	13901	478	12	1	13883	1	13900	0.0	22899
a17_Guyane	NC_035232_ref_China	96.425	13901	478	12	1	13883	1	13900	0.0	22899
a18_Guyane	a10_F_Avignon	96.407	13834	478	12	31	13846	1	13833	0.0	22775
a18_Guyane	a11_F_Angouleme	99.237	13761	102	2	31	13789	1	13760	0.0	24827
a18_Guyane	a12_F_Angouleme	96.473	13864	470	12	1	13846	1	13863	0.0	22875
a18_Guyane	a13_F_Trescleoux	99.256	13846	102	1	1	13846	1	13845	0.0	24997
a18_Guyane	a14_F_Dieulefit	99.256	13846	102	1	1	13846	1	13845	0.0	24997
a18_Guyane	a15_Mexique	97.733	13853	300	11	1	13846	1	13846	0.0	23830
a18_Guyane	a16_Guyane	100.000	13846	0	0	1	13846	1	13846	0.0	25569
a18_Guyane	a17_Guyane	100.000	13846	0	0	1	13846	1	13846	0.0	25569
a18_Guyane	a18_Guyane	100.000	13846	0	0	1	13846	1	13846	0.0	25569
a18_Guyane	a19_Ghana_2	96.410	13761	476	11	1	13744	1	13760	0.0	22659
a18_Guyane	a1_Ghana	96.404	13847	479	12	1	13829	1	13846	0.0	22794
a18_Guyane	a20_Ghana_2	96.410	13761	476	11	1	13744	1	13760	0.0	22659
a18_Guyane	a21_Ghana_2	96.404	13847	479	12	1	13829	1	13846	0.0	22794
a18_Guyane	a22_Taiwan	96.415	13864	478	12	1	13846	1	13863	0.0	22831
a18_Guyane	a25_Kenya_ICIPE	96.415	13864	478	12	1	13846	1	13863	0.0	22831
a18_Guyane	a26_Kenya_ICIPE	96.447	13848	471	13	1	13829	1	13846	0.0	22827
a18_Guyane	a27_Kenya_ICIPE	96.415	13864	478	12	1	13846	1	13863	0.0	22831
a18_Guyane	a28_Kenya_Bondo	96.454	13848	470	13	1	13829	1	13846	0.0	22833
a18_Guyane	a29_F_Perigueux	99.256	13846	102	1	1	13846	1	13845	0.0	24997
a18_Guyane	a2_Ghana	96.408	13864	479	12	1	13846	1	13863	0.0	22825
a18_Guyane	a30_F_Champagne_au_mont_d_or	99.252	13761	102	1	1	13761	1	13760	0.0	24840
a18_Guyane	a31_F_Lyon	99.244	13761	103	1	1	13761	1	13760	0.0	24834
a18_Guyane	a32_F_Montpellier	99.256	13846	102	1	1	13846	1	13845	0.0	24997
a18_Guyane	a33_not_hermetia_F_Bayonne	81.599	12673	2054	204	1296	13845	1224	13741	0.0	10227
a18_Guyane	a34_not_hermetia_F_Bayonne	81.599	12673	2054	204	1296	13845	1224	13741	0.0	10227
a18_Guyane	a35_F_Lormont	99.249	13846	103	1	1	13846	1	13845	0.0	24991
a18_Guyane	a36_F_Lormont	99.256	13846	102	1	1	13846	1	13845	0.0	24997
a18_Guyane	a37_F_La_Force	99.256	13846	102	1	1	13846	1	13845	0.0	24997
a18_Guyane	a38_F_St_Georges_Les_Baiilargeaux	99.249	13846	103	1	1	13846	1	13845	0.0	24991
a18_Guyane	a39_F_Nogent_Sur_Marne	99.574	13846	58	1	1	13846	1	13845	0.0	25241
a18_Guyane	a3_Ghana	96.404	13847	479	12	1	13829	1	13846	0.0	22794
a18_Guyane	a40_F_Vincennes	99.574	13846	58	1	1	13846	1	13845	0.0	25241
a18_Guyane	a41_F_Paris	99.256	13846	102	1	1	13846	1	13845	0.0	24997
a18_Guyane	a43_F_La_Rochelle	99.249	13846	103	1	1	13846	1	13845	0.0	24991
a18_Guyane	a44_F_Poitiers	99.256	13846	102	1	1	13846	1	13845	0.0	24997
a18_Guyane	a45_F_Poitiers	99.249	13846	103	1	1	13846	1	13845	0.0	24991
a18_Guyane	a46_F_Poitiers	99.256	13846	102	1	1	13846	1	13845	0.0	24997
a18_Guyane	a47_F_Poitiers	99.256	13846	102	1	1	13846	1	13845	0.0	24997
a18_Guyane	a48_F_Colomiers	98.939	13762	144	2	1	13762	1	13760	0.0	24604
a18_Guyane	a49_F_Valloire_Sur_Cisse	99.256	13846	102	1	1	13846	1	13845	0.0	24997
a18_Guyane	a4_Taiwan	99.249	13846	103	1	1	13846	1	13845	0.0	24991
a18_Guyane	a50_F_Blois	99.256	13846	102	1	1	13846	1	13845	0.0	24997
a18_Guyane	a51_F_Blois	99.244	13761	103	1	1	13761	1	13760	0.0	24834
a18_Guyane	a52_F_Blois	99.545	13848	60	2	1	13846	1	13847	0.0	25220
a18_Guyane	a53_F_Blois	99.242	13846	104	1	1	13846	1	13845	0.0	24986
a18_Guyane	a54_F_St_Marcellin_En_Forez	99.252	13761	102	1	1	13761	1	13760	0.0	24840
a18_Guyane	a55_F_Lormont	99.244	13761	103	1	1	13761	1	13760	0.0	24834
a18_Guyane	a56_F_La_Rochelle	99.244	13761	103	1	1	13761	1	13760	0.0	24834
a18_Guyane	a57_F_Paris	99.237	13761	104	1	1	13761	1	13760	0.0	24829
a18_Guyane	a58_F_La_Rochelle	99.252	13761	102	1	1	13761	1	13760	0.0	24840
a18_Guyane	a59_F_Bayonne	81.599	12673	2054	204	1296	13845	1224	13741	0.0	10227
a18_Guyane	a7_Kenya_Bondo	96.451	13835	470	13	31	13846	1	13833	0.0	22809
a18_Guyane	a8_Taiwan	96.407	13834	478	12	31	13846	1	13833	0.0	22775
a18_Guyane	a9_Taiwan	96.417	13761	475	11	31	13774	1	13760	0.0	22665
a18_Guyane	ADF04_CF	96.408	13864	479	12	1	13846	1	13863	0.0	22825
a18_Guyane	AOM17_CF	96.401	13864	479	13	1	13846	1	13862	0.0	22820
a18_Guyane	Berkley_female	96.415	13864	478	12	1	13846	1	13863	0.0	22831
a18_Guyane	Berkley_male_	96.415	13864	478	12	1	13846	1	13863	0.0	22831
a18_Guyane	Mito_Uk_Cambridge	96.415	13864	478	12	1	13846	1	13863	0.0	22831
a18_Guyane	NC_035232_ref_China	96.415	13864	478	12	1	13846	1	13863	0.0	22831
a19_Ghana_2	a10_F_Avignon	99.993	13730	1	0	31	13760	1	13730	0.0	25350
a19_Ghana_2	a11_F_Angouleme	96.373	13732	479	12	31	13760	1	13715	0.0	22581
a19_Ghana_2	a12_F_Angouleme	99.673	13760	45	0	1	13760	1	13760	0.0	25161
a19_Ghana_2	a13_F_Trescleoux	96.395	13760	479	11	1	13760	1	13743	0.0	22646
a19_Ghana_2	a14_F_Dieulefit	96.395	13760	479	11	1	13760	1	13743	0.0	22646
a19_Ghana_2	a15_Mexique	96.542	13766	448	17	1	13760	1	13744	0.0	22759
a19_Ghana_2	a16_Guyane	96.410	13761	476	11	1	13760	1	13744	0.0	22659
a19_Ghana_2	a17_Guyane	96.410	13761	476	11	1	13760	1	13744	0.0	22659
a19_Ghana_2	a18_Guyane	96.410	13761	476	11	1	13760	1	13744	0.0	22659
a19_Ghana_2	a19_Ghana_2	100.000	13760	0	0	1	13760	1	13760	0.0	25411
a19_Ghana_2	a1_Ghana	100.000	13760	0	0	1	13760	1	13760	0.0	25411
a19_Ghana_2	a20_Ghana_2	100.000	13760	0	0	1	13760	1	13760	0.0	25411
a19_Ghana_2	a21_Ghana_2	100.000	13760	0	0	1	13760	1	13760	0.0	25411
a19_Ghana_2	a22_Taiwan	99.993	13760	1	0	1	13760	1	13760	0.0	25405
a19_Ghana_2	a25_Kenya_ICIPE	99.993	13760	1	0	1	13760	1	13760	0.0	25405
a19_Ghana_2	a26_Kenya_ICIPE	99.608	13761	52	2	1	13760	1	13760	0.0	25111
a19_Ghana_2	a27_Kenya_ICIPE	99.993	13760	1	0	1	13760	1	13760	0.0	25405
a19_Ghana_2	a28_Kenya_Bondo	99.615	13761	51	2	1	13760	1	13760	0.0	25117
a19_Ghana_2	a29_F_Perigueux	96.395	13760	479	11	1	13760	1	13743	0.0	22646
a19_Ghana_2	a2_Ghana	100.000	13760	0	0	1	13760	1	13760	0.0	25411
a19_Ghana_2	a30_F_Champagne_au_mont_d_or	96.395	13760	479	11	1	13760	1	13743	0.0	22646
a19_Ghana_2	a31_F_Lyon	96.395	13760	479	11	1	13760	1	13743	0.0	22646
a19_Ghana_2	a32_F_Montpellier	96.395	13760	479	11	1	13760	1	13743	0.0	22646
a19_Ghana_2	a33_not_hermetia_F_Bayonne	80.750	13688	2315	251	211	13760	132	13637	0.0	10384
a19_Ghana_2	a33_not_hermetia_F_Bayonne	91.608	143	7	2	1	143	1	138	1.34e-50	193
a19_Ghana_2	a34_not_hermetia_F_Bayonne	80.750	13688	2315	251	211	13760	132	13637	0.0	10384
a19_Ghana_2	a34_not_hermetia_F_Bayonne	91.608	143	7	2	1	143	1	138	1.34e-50	193
a19_Ghana_2	a35_F_Lormont	96.388	13760	480	11	1	13760	1	13743	0.0	22641
a19_Ghana_2	a36_F_Lormont	96.395	13760	479	11	1	13760	1	13743	0.0	22646
a19_Ghana_2	a37_F_La_Force	96.395	13760	479	11	1	13760	1	13743	0.0	22646
a19_Ghana_2	a38_F_St_Georges_Les_Baiilargeaux	96.388	13760	480	11	1	13760	1	13743	0.0	22641
a19_Ghana_2	a39_F_Nogent_Sur_Marne	96.432	13760	474	9	1	13760	1	13743	0.0	22674
a19_Ghana_2	a3_Ghana	100.000	13760	0	0	1	13760	1	13760	0.0	25411
a19_Ghana_2	a40_F_Vincennes	96.432	13760	474	9	1	13760	1	13743	0.0	22674
a19_Ghana_2	a41_F_Paris	96.395	13760	479	11	1	13760	1	13743	0.0	22646
a19_Ghana_2	a43_F_La_Rochelle	96.403	13760	478	11	1	13760	1	13743	0.0	22652
a19_Ghana_2	a44_F_Poitiers	96.395	13760	479	11	1	13760	1	13743	0.0	22646
a19_Ghana_2	a45_F_Poitiers	96.388	13760	480	11	1	13760	1	13743	0.0	22641
a19_Ghana_2	a46_F_Poitiers	96.395	13760	479	11	1	13760	1	13743	0.0	22646
a19_Ghana_2	a47_F_Poitiers	96.395	13760	479	11	1	13760	1	13743	0.0	22646
a19_Ghana_2	a48_F_Colomiers	96.446	13760	471	11	1	13760	1	13742	0.0	22685
a19_Ghana_2	a49_F_Valloire_Sur_Cisse	96.395	13760	479	11	1	13760	1	13743	0.0	22646
a19_Ghana_2	a4_Taiwan	96.403	13760	478	11	1	13760	1	13743	0.0	22652
a19_Ghana_2	a50_F_Blois	96.395	13760	479	11	1	13760	1	13743	0.0	22646
a19_Ghana_2	a51_F_Blois	96.388	13760	480	11	1	13760	1	13743	0.0	22641
a19_Ghana_2	a52_F_Blois	96.396	13762	477	11	1	13760	1	13745	0.0	22648
a19_Ghana_2	a53_F_Blois	96.381	13760	481	11	1	13760	1	13743	0.0	22635
a19_Ghana_2	a54_F_St_Marcellin_En_Forez	96.395	13760	479	11	1	13760	1	13743	0.0	22646
a19_Ghana_2	a55_F_Lormont	96.388	13760	480	11	1	13760	1	13743	0.0	22641
a19_Ghana_2	a56_F_La_Rochelle	96.403	13760	478	11	1	13760	1	13743	0.0	22652
a19_Ghana_2	a57_F_Paris	96.381	13760	481	11	1	13760	1	13743	0.0	22635
a19_Ghana_2	a58_F_La_Rochelle	96.395	13760	479	11	1	13760	1	13743	0.0	22646
a19_Ghana_2	a59_F_Bayonne	80.750	13688	2315	251	211	13760	132	13637	0.0	10384
a19_Ghana_2	a59_F_Bayonne	91.608	143	7	2	1	143	1	138	1.34e-50	193
a19_Ghana_2	a7_Kenya_Bondo	99.614	13731	51	2	31	13760	1	13730	0.0	25062
a19_Ghana_2	a8_Taiwan	99.993	13730	1	0	31	13760	1	13730	0.0	25350
a19_Ghana_2	a9_Taiwan	99.993	13730	1	0	31	13760	1	13730	0.0	25350
a19_Ghana_2	ADF04_CF	100.000	13760	0	0	1	13760	1	13760	0.0	25411
a19_Ghana_2	AOM17_CF	99.993	13760	0	1	1	13760	1	13759	0.0	25403
a19_Ghana_2	Berkley_female	99.993	13760	1	0	1	13760	1	13760	0.0	25405
a19_Ghana_2	Berkley_male_	99.993	13760	1	0	1	13760	1	13760	0.0	25405
a19_Ghana_2	Mito_Uk_Cambridge	99.993	13760	1	0	1	13760	1	13760	0.0	25405
a19_Ghana_2	NC_035232_ref_China	99.993	13760	1	0	1	13760	1	13760	0.0	25405
a1_Ghana	a10_F_Avignon	99.993	13816	1	0	31	13846	1	13816	0.0	25508
a1_Ghana	a11_F_Angouleme	96.385	13776	479	12	31	13804	1	13759	0.0	22663
a1_Ghana	a12_F_Angouleme	99.675	13846	45	0	1	13846	1	13846	0.0	25320
a1_Ghana	a13_F_Trescleoux	96.389	13846	482	12	1	13846	1	13828	0.0	22783
a1_Ghana	a14_F_Dieulefit	96.389	13846	482	12	1	13846	1	13828	0.0	22783
a1_Ghana	a15_Mexique	96.535	13852	451	18	1	13846	1	13829	0.0	22894
a1_Ghana	a16_Guyane	96.404	13847	479	12	1	13846	1	13829	0.0	22794
a1_Ghana	a17_Guyane	96.404	13847	479	12	1	13846	1	13829	0.0	22794
a1_Ghana	a18_Guyane	96.404	13847	479	12	1	13846	1	13829	0.0	22794
a1_Ghana	a19_Ghana_2	100.000	13760	0	0	1	13760	1	13760	0.0	25411
a1_Ghana	a1_Ghana	100.000	13846	0	0	1	13846	1	13846	0.0	25569
a1_Ghana	a20_Ghana_2	100.000	13760	0	0	1	13760	1	13760	0.0	25411
a1_Ghana	a21_Ghana_2	100.000	13846	0	0	1	13846	1	13846	0.0	25569
a1_Ghana	a22_Taiwan	99.993	13846	1	0	1	13846	1	13846	0.0	25564
a1_Ghana	a25_Kenya_ICIPE	99.993	13846	1	0	1	13846	1	13846	0.0	25564
a1_Ghana	a26_Kenya_ICIPE	99.610	13847	52	2	1	13846	1	13846	0.0	25270
a1_Ghana	a27_Kenya_ICIPE	99.993	13846	1	0	1	13846	1	13846	0.0	25564
a1_Ghana	a28_Kenya_Bondo	99.617	13847	51	2	1	13846	1	13846	0.0	25276
a1_Ghana	a29_F_Perigueux	96.389	13846	482	12	1	13846	1	13828	0.0	22783
a1_Ghana	a2_Ghana	100.000	13846	0	0	1	13846	1	13846	0.0	25569
a1_Ghana	a30_F_Champagne_au_mont_d_or	96.400	13777	479	11	1	13777	1	13760	0.0	22677
a1_Ghana	a31_F_Lyon	96.400	13777	479	11	1	13777	1	13760	0.0	22677
a1_Ghana	a32_F_Montpellier	96.389	13846	482	12	1	13846	1	13828	0.0	22783
a1_Ghana	a33_not_hermetia_F_Bayonne	80.742	13776	2331	253	211	13846	132	13725	0.0	10445
a1_Ghana	a33_not_hermetia_F_Bayonne	91.608	143	7	2	1	143	1	138	1.35e-50	193
a1_Ghana	a34_not_hermetia_F_Bayonne	80.742	13776	2331	253	211	13846	132	13725	0.0	10445
a1_Ghana	a34_not_hermetia_F_Bayonne	91.608	143	7	2	1	143	1	138	1.35e-50	193
a1_Ghana	a35_F_Lormont	96.382	13846	483	12	1	13846	1	13828	0.0	22777
a1_Ghana	a36_F_Lormont	96.389	13846	482	12	1	13846	1	13828	0.0	22783
a1_Ghana	a37_F_La_Force	96.389	13846	482	12	1	13846	1	13828	0.0	22783
a1_Ghana	a38_F_St_Georges_Les_Baiilargeaux	96.382	13846	483	12	1	13846	1	13828	0.0	22777
a1_Ghana	a39_F_Nogent_Sur_Marne	96.425	13846	477	10	1	13846	1	13828	0.0	22810
a1_Ghana	a3_Ghana	100.000	13846	0	0	1	13846	1	13846	0.0	25569
a1_Ghana	a40_F_Vincennes	96.425	13846	477	10	1	13846	1	13828	0.0	22810
a1_Ghana	a41_F_Paris	96.389	13846	482	12	1	13846	1	13828	0.0	22783
a1_Ghana	a43_F_La_Rochelle	96.396	13846	481	12	1	13846	1	13828	0.0	22788
a1_Ghana	a44_F_Poitiers	96.389	13846	482	12	1	13846	1	13828	0.0	22783
a1_Ghana	a45_F_Poitiers	96.382	13846	483	12	1	13846	1	13828	0.0	22777
a1_Ghana	a46_F_Poitiers	96.389	13846	482	12	1	13846	1	13828	0.0	22783
a1_Ghana	a47_F_Poitiers	96.389	13846	482	12	1	13846	1	13828	0.0	22783
a1_Ghana	a48_F_Colomiers	96.451	13778	471	11	1	13778	1	13760	0.0	22718
a1_Ghana	a49_F_Valloire_Sur_Cisse	96.389	13846	482	12	1	13846	1	13828	0.0	22783
a1_Ghana	a4_Taiwan	96.396	13846	481	12	1	13846	1	13828	0.0	22788
a1_Ghana	a50_F_Blois	96.389	13846	482	12	1	13846	1	13828	0.0	22783
a1_Ghana	a51_F_Blois	96.393	13777	480	11	1	13777	1	13760	0.0	22672
a1_Ghana	a52_F_Blois	96.389	13848	480	12	1	13846	1	13830	0.0	22785
a1_Ghana	a53_F_Blois	96.374	13846	484	12	1	13846	1	13828	0.0	22772
a1_Ghana	a54_F_St_Marcellin_En_Forez	96.400	13777	479	11	1	13777	1	13760	0.0	22677
a1_Ghana	a55_F_Lormont	96.393	13777	480	11	1	13777	1	13760	0.0	22672
a1_Ghana	a56_F_La_Rochelle	96.407	13777	478	11	1	13777	1	13760	0.0	22683
a1_Ghana	a57_F_Paris	96.385	13777	481	11	1	13777	1	13760	0.0	22666
a1_Ghana	a58_F_La_Rochelle	96.400	13777	479	11	1	13777	1	13760	0.0	22677
a1_Ghana	a59_F_Bayonne	80.742	13776	2331	253	211	13846	132	13725	0.0	10445
a1_Ghana	a59_F_Bayonne	91.608	143	7	2	1	143	1	138	1.35e-50	193
a1_Ghana	a7_Kenya_Bondo	99.616	13817	51	2	31	13846	1	13816	0.0	25220
a1_Ghana	a8_Taiwan	99.993	13816	1	0	31	13846	1	13816	0.0	25508
a1_Ghana	a9_Taiwan	99.993	13760	1	0	31	13790	1	13760	0.0	25405
a1_Ghana	ADF04_CF	100.000	13846	0	0	1	13846	1	13846	0.0	25569
a1_Ghana	AOM17_CF	99.993	13846	0	1	1	13846	1	13845	0.0	25562
a1_Ghana	Berkley_female	99.993	13846	1	0	1	13846	1	13846	0.0	25564
a1_Ghana	Berkley_male_	99.993	13846	1	0	1	13846	1	13846	0.0	25564
a1_Ghana	Mito_Uk_Cambridge	99.993	13846	1	0	1	13846	1	13846	0.0	25564
a1_Ghana	NC_035232_ref_China	99.993	13846	1	0	1	13846	1	13846	0.0	25564
a20_Ghana_2	a10_F_Avignon	99.993	13730	1	0	31	13760	1	13730	0.0	25350
a20_Ghana_2	a11_F_Angouleme	96.373	13732	479	12	31	13760	1	13715	0.0	22581
a20_Ghana_2	a12_F_Angouleme	99.673	13760	45	0	1	13760	1	13760	0.0	25161
a20_Ghana_2	a13_F_Trescleoux	96.395	13760	479	11	1	13760	1	13743	0.0	22646
a20_Ghana_2	a14_F_Dieulefit	96.395	13760	479	11	1	13760	1	13743	0.0	22646
a20_Ghana_2	a15_Mexique	96.542	13766	448	17	1	13760	1	13744	0.0	22759
a20_Ghana_2	a16_Guyane	96.410	13761	476	11	1	13760	1	13744	0.0	22659
a20_Ghana_2	a17_Guyane	96.410	13761	476	11	1	13760	1	13744	0.0	22659
a20_Ghana_2	a18_Guyane	96.410	13761	476	11	1	13760	1	13744	0.0	22659
a20_Ghana_2	a19_Ghana_2	100.000	13760	0	0	1	13760	1	13760	0.0	25411
a20_Ghana_2	a1_Ghana	100.000	13760	0	0	1	13760	1	13760	0.0	25411
a20_Ghana_2	a20_Ghana_2	100.000	13760	0	0	1	13760	1	13760	0.0	25411
a20_Ghana_2	a21_Ghana_2	100.000	13760	0	0	1	13760	1	13760	0.0	25411
a20_Ghana_2	a22_Taiwan	99.993	13760	1	0	1	13760	1	13760	0.0	25405
a20_Ghana_2	a25_Kenya_ICIPE	99.993	13760	1	0	1	13760	1	13760	0.0	25405
a20_Ghana_2	a26_Kenya_ICIPE	99.608	13761	52	2	1	13760	1	13760	0.0	25111
a20_Ghana_2	a27_Kenya_ICIPE	99.993	13760	1	0	1	13760	1	13760	0.0	25405
a20_Ghana_2	a28_Kenya_Bondo	99.615	13761	51	2	1	13760	1	13760	0.0	25117
a20_Ghana_2	a29_F_Perigueux	96.395	13760	479	11	1	13760	1	13743	0.0	22646
a20_Ghana_2	a2_Ghana	100.000	13760	0	0	1	13760	1	13760	0.0	25411
a20_Ghana_2	a30_F_Champagne_au_mont_d_or	96.395	13760	479	11	1	13760	1	13743	0.0	22646
a20_Ghana_2	a31_F_Lyon	96.395	13760	479	11	1	13760	1	13743	0.0	22646
a20_Ghana_2	a32_F_Montpellier	96.395	13760	479	11	1	13760	1	13743	0.0	22646
a20_Ghana_2	a33_not_hermetia_F_Bayonne	80.750	13688	2315	251	211	13760	132	13637	0.0	10384
a20_Ghana_2	a33_not_hermetia_F_Bayonne	91.608	143	7	2	1	143	1	138	1.34e-50	193
a20_Ghana_2	a34_not_hermetia_F_Bayonne	80.750	13688	2315	251	211	13760	132	13637	0.0	10384
a20_Ghana_2	a34_not_hermetia_F_Bayonne	91.608	143	7	2	1	143	1	138	1.34e-50	193
a20_Ghana_2	a35_F_Lormont	96.388	13760	480	11	1	13760	1	13743	0.0	22641
a20_Ghana_2	a36_F_Lormont	96.395	13760	479	11	1	13760	1	13743	0.0	22646
a20_Ghana_2	a37_F_La_Force	96.395	13760	479	11	1	13760	1	13743	0.0	22646
a20_Ghana_2	a38_F_St_Georges_Les_Baiilargeaux	96.388	13760	480	11	1	13760	1	13743	0.0	22641
a20_Ghana_2	a39_F_Nogent_Sur_Marne	96.432	13760	474	9	1	13760	1	13743	0.0	22674
a20_Ghana_2	a3_Ghana	100.000	13760	0	0	1	13760	1	13760	0.0	25411
a20_Ghana_2	a40_F_Vincennes	96.432	13760	474	9	1	13760	1	13743	0.0	22674
a20_Ghana_2	a41_F_Paris	96.395	13760	479	11	1	13760	1	13743	0.0	22646
a20_Ghana_2	a43_F_La_Rochelle	96.403	13760	478	11	1	13760	1	13743	0.0	22652
a20_Ghana_2	a44_F_Poitiers	96.395	13760	479	11	1	13760	1	13743	0.0	22646
a20_Ghana_2	a45_F_Poitiers	96.388	13760	480	11	1	13760	1	13743	0.0	22641
a20_Ghana_2	a46_F_Poitiers	96.395	13760	479	11	1	13760	1	13743	0.0	22646
a20_Ghana_2	a47_F_Poitiers	96.395	13760	479	11	1	13760	1	13743	0.0	22646
a20_Ghana_2	a48_F_Colomiers	96.446	13760	471	11	1	13760	1	13742	0.0	22685
a20_Ghana_2	a49_F_Valloire_Sur_Cisse	96.395	13760	479	11	1	13760	1	13743	0.0	22646
a20_Ghana_2	a4_Taiwan	96.403	13760	478	11	1	13760	1	13743	0.0	22652
a20_Ghana_2	a50_F_Blois	96.395	13760	479	11	1	13760	1	13743	0.0	22646
a20_Ghana_2	a51_F_Blois	96.388	13760	480	11	1	13760	1	13743	0.0	22641
a20_Ghana_2	a52_F_Blois	96.396	13762	477	11	1	13760	1	13745	0.0	22648
a20_Ghana_2	a53_F_Blois	96.381	13760	481	11	1	13760	1	13743	0.0	22635
a20_Ghana_2	a54_F_St_Marcellin_En_Forez	96.395	13760	479	11	1	13760	1	13743	0.0	22646
a20_Ghana_2	a55_F_Lormont	96.388	13760	480	11	1	13760	1	13743	0.0	22641
a20_Ghana_2	a56_F_La_Rochelle	96.403	13760	478	11	1	13760	1	13743	0.0	22652
a20_Ghana_2	a57_F_Paris	96.381	13760	481	11	1	13760	1	13743	0.0	22635
a20_Ghana_2	a58_F_La_Rochelle	96.395	13760	479	11	1	13760	1	13743	0.0	22646
a20_Ghana_2	a59_F_Bayonne	80.750	13688	2315	251	211	13760	132	13637	0.0	10384
a20_Ghana_2	a59_F_Bayonne	91.608	143	7	2	1	143	1	138	1.34e-50	193
a20_Ghana_2	a7_Kenya_Bondo	99.614	13731	51	2	31	13760	1	13730	0.0	25062
a20_Ghana_2	a8_Taiwan	99.993	13730	1	0	31	13760	1	13730	0.0	25350
a20_Ghana_2	a9_Taiwan	99.993	13730	1	0	31	13760	1	13730	0.0	25350
a20_Ghana_2	ADF04_CF	100.000	13760	0	0	1	13760	1	13760	0.0	25411
a20_Ghana_2	AOM17_CF	99.993	13760	0	1	1	13760	1	13759	0.0	25403
a20_Ghana_2	Berkley_female	99.993	13760	1	0	1	13760	1	13760	0.0	25405
a20_Ghana_2	Berkley_male_	99.993	13760	1	0	1	13760	1	13760	0.0	25405
a20_Ghana_2	Mito_Uk_Cambridge	99.993	13760	1	0	1	13760	1	13760	0.0	25405
a20_Ghana_2	NC_035232_ref_China	99.993	13760	1	0	1	13760	1	13760	0.0	25405
a21_Ghana_2	a10_F_Avignon	99.993	13816	1	0	31	13846	1	13816	0.0	25508
a21_Ghana_2	a11_F_Angouleme	96.385	13776	479	12	31	13804	1	13759	0.0	22663
a21_Ghana_2	a12_F_Angouleme	99.675	13846	45	0	1	13846	1	13846	0.0	25320
a21_Ghana_2	a13_F_Trescleoux	96.389	13846	482	12	1	13846	1	13828	0.0	22783
a21_Ghana_2	a14_F_Dieulefit	96.389	13846	482	12	1	13846	1	13828	0.0	22783
a21_Ghana_2	a15_Mexique	96.535	13852	451	18	1	13846	1	13829	0.0	22894
a21_Ghana_2	a16_Guyane	96.404	13847	479	12	1	13846	1	13829	0.0	22794
a21_Ghana_2	a17_Guyane	96.404	13847	479	12	1	13846	1	13829	0.0	22794
a21_Ghana_2	a18_Guyane	96.404	13847	479	12	1	13846	1	13829	0.0	22794
a21_Ghana_2	a19_Ghana_2	100.000	13760	0	0	1	13760	1	13760	0.0	25411
a21_Ghana_2	a1_Ghana	100.000	13846	0	0	1	13846	1	13846	0.0	25569
a21_Ghana_2	a20_Ghana_2	100.000	13760	0	0	1	13760	1	13760	0.0	25411
a21_Ghana_2	a21_Ghana_2	100.000	13846	0	0	1	13846	1	13846	0.0	25569
a21_Ghana_2	a22_Taiwan	99.993	13846	1	0	1	13846	1	13846	0.0	25564
a21_Ghana_2	a25_Kenya_ICIPE	99.993	13846	1	0	1	13846	1	13846	0.0	25564
a21_Ghana_2	a26_Kenya_ICIPE	99.610	13847	52	2	1	13846	1	13846	0.0	25270
a21_Ghana_2	a27_Kenya_ICIPE	99.993	13846	1	0	1	13846	1	13846	0.0	25564
a21_Ghana_2	a28_Kenya_Bondo	99.617	13847	51	2	1	13846	1	13846	0.0	25276
a21_Ghana_2	a29_F_Perigueux	96.389	13846	482	12	1	13846	1	13828	0.0	22783
a21_Ghana_2	a2_Ghana	100.000	13846	0	0	1	13846	1	13846	0.0	25569
a21_Ghana_2	a30_F_Champagne_au_mont_d_or	96.400	13777	479	11	1	13777	1	13760	0.0	22677
a21_Ghana_2	a31_F_Lyon	96.400	13777	479	11	1	13777	1	13760	0.0	22677
a21_Ghana_2	a32_F_Montpellier	96.389	13846	482	12	1	13846	1	13828	0.0	22783
a21_Ghana_2	a33_not_hermetia_F_Bayonne	80.742	13776	2331	253	211	13846	132	13725	0.0	10445
a21_Ghana_2	a33_not_hermetia_F_Bayonne	91.608	143	7	2	1	143	1	138	1.35e-50	193
a21_Ghana_2	a34_not_hermetia_F_Bayonne	80.742	13776	2331	253	211	13846	132	13725	0.0	10445
a21_Ghana_2	a34_not_hermetia_F_Bayonne	91.608	143	7	2	1	143	1	138	1.35e-50	193
a21_Ghana_2	a35_F_Lormont	96.382	13846	483	12	1	13846	1	13828	0.0	22777
a21_Ghana_2	a36_F_Lormont	96.389	13846	482	12	1	13846	1	13828	0.0	22783
a21_Ghana_2	a37_F_La_Force	96.389	13846	482	12	1	13846	1	13828	0.0	22783
a21_Ghana_2	a38_F_St_Georges_Les_Baiilargeaux	96.382	13846	483	12	1	13846	1	13828	0.0	22777
a21_Ghana_2	a39_F_Nogent_Sur_Marne	96.425	13846	477	10	1	13846	1	13828	0.0	22810
a21_Ghana_2	a3_Ghana	100.000	13846	0	0	1	13846	1	13846	0.0	25569
a21_Ghana_2	a40_F_Vincennes	96.425	13846	477	10	1	13846	1	13828	0.0	22810
a21_Ghana_2	a41_F_Paris	96.389	13846	482	12	1	13846	1	13828	0.0	22783
a21_Ghana_2	a43_F_La_Rochelle	96.396	13846	481	12	1	13846	1	13828	0.0	22788
a21_Ghana_2	a44_F_Poitiers	96.389	13846	482	12	1	13846	1	13828	0.0	22783
a21_Ghana_2	a45_F_Poitiers	96.382	13846	483	12	1	13846	1	13828	0.0	22777
a21_Ghana_2	a46_F_Poitiers	96.389	13846	482	12	1	13846	1	13828	0.0	22783
a21_Ghana_2	a47_F_Poitiers	96.389	13846	482	12	1	13846	1	13828	0.0	22783
a21_Ghana_2	a48_F_Colomiers	96.451	13778	471	11	1	13778	1	13760	0.0	22718
a21_Ghana_2	a49_F_Valloire_Sur_Cisse	96.389	13846	482	12	1	13846	1	13828	0.0	22783
a21_Ghana_2	a4_Taiwan	96.396	13846	481	12	1	13846	1	13828	0.0	22788
a21_Ghana_2	a50_F_Blois	96.389	13846	482	12	1	13846	1	13828	0.0	22783
a21_Ghana_2	a51_F_Blois	96.393	13777	480	11	1	13777	1	13760	0.0	22672
a21_Ghana_2	a52_F_Blois	96.389	13848	480	12	1	13846	1	13830	0.0	22785
a21_Ghana_2	a53_F_Blois	96.374	13846	484	12	1	13846	1	13828	0.0	22772
a21_Ghana_2	a54_F_St_Marcellin_En_Forez	96.400	13777	479	11	1	13777	1	13760	0.0	22677
a21_Ghana_2	a55_F_Lormont	96.393	13777	480	11	1	13777	1	13760	0.0	22672
a21_Ghana_2	a56_F_La_Rochelle	96.407	13777	478	11	1	13777	1	13760	0.0	22683
a21_Ghana_2	a57_F_Paris	96.385	13777	481	11	1	13777	1	13760	0.0	22666
a21_Ghana_2	a58_F_La_Rochelle	96.400	13777	479	11	1	13777	1	13760	0.0	22677
a21_Ghana_2	a59_F_Bayonne	80.742	13776	2331	253	211	13846	132	13725	0.0	10445
a21_Ghana_2	a59_F_Bayonne	91.608	143	7	2	1	143	1	138	1.35e-50	193
a21_Ghana_2	a7_Kenya_Bondo	99.616	13817	51	2	31	13846	1	13816	0.0	25220
a21_Ghana_2	a8_Taiwan	99.993	13816	1	0	31	13846	1	13816	0.0	25508
a21_Ghana_2	a9_Taiwan	99.993	13760	1	0	31	13790	1	13760	0.0	25405
a21_Ghana_2	ADF04_CF	100.000	13846	0	0	1	13846	1	13846	0.0	25569
a21_Ghana_2	AOM17_CF	99.993	13846	0	1	1	13846	1	13845	0.0	25562
a21_Ghana_2	Berkley_female	99.993	13846	1	0	1	13846	1	13846	0.0	25564
a21_Ghana_2	Berkley_male_	99.993	13846	1	0	1	13846	1	13846	0.0	25564
a21_Ghana_2	Mito_Uk_Cambridge	99.993	13846	1	0	1	13846	1	13846	0.0	25564
a21_Ghana_2	NC_035232_ref_China	99.993	13846	1	0	1	13846	1	13846	0.0	25564
a22_Taiwan	a10_F_Avignon	100.000	13846	0	0	31	13876	1	13846	0.0	25569
a22_Taiwan	a11_F_Angouleme	96.392	13776	478	12	31	13804	1	13759	0.0	22668
a22_Taiwan	a12_F_Angouleme	99.683	13900	44	0	1	13900	1	13900	0.0	25425
a22_Taiwan	a13_F_Trescleoux	96.410	13900	481	12	1	13900	1	13882	0.0	22888
a22_Taiwan	a14_F_Dieulefit	96.401	13864	481	12	1	13864	1	13846	0.0	22822
a22_Taiwan	a15_Mexique	96.546	13869	450	18	1	13863	1	13846	0.0	22930
a22_Taiwan	a16_Guyane	96.425	13901	478	12	1	13900	1	13883	0.0	22899
a22_Taiwan	a17_Guyane	96.425	13901	478	12	1	13900	1	13883	0.0	22899
a22_Taiwan	a18_Guyane	96.415	13864	478	12	1	13863	1	13846	0.0	22831
a22_Taiwan	a19_Ghana_2	99.993	13760	1	0	1	13760	1	13760	0.0	25405
a22_Taiwan	a1_Ghana	99.993	13846	1	0	1	13846	1	13846	0.0	25564
a22_Taiwan	a20_Ghana_2	99.993	13760	1	0	1	13760	1	13760	0.0	25405
a22_Taiwan	a21_Ghana_2	99.993	13846	1	0	1	13846	1	13846	0.0	25564
a22_Taiwan	a22_Taiwan	100.000	13901	0	0	1	13901	1	13901	0.0	25671
a22_Taiwan	a25_Kenya_ICIPE	100.000	13901	0	0	1	13901	1	13901	0.0	25671
a22_Taiwan	a26_Kenya_ICIPE	99.617	13847	51	2	1	13846	1	13846	0.0	25276
a22_Taiwan	a27_Kenya_ICIPE	100.000	13901	0	0	1	13901	1	13901	0.0	25671
a22_Taiwan	a28_Kenya_Bondo	99.624	13847	50	2	1	13846	1	13846	0.0	25281
a22_Taiwan	a29_F_Perigueux	96.410	13900	481	12	1	13900	1	13882	0.0	22888
a22_Taiwan	a2_Ghana	99.993	13901	1	0	1	13901	1	13901	0.0	25665
a22_Taiwan	a30_F_Champagne_au_mont_d_or	96.407	13777	478	11	1	13777	1	13760	0.0	22683
a22_Taiwan	a31_F_Lyon	96.407	13777	478	11	1	13777	1	13760	0.0	22683
a22_Taiwan	a32_F_Montpellier	96.410	13900	481	12	1	13900	1	13882	0.0	22888
a22_Taiwan	a33_not_hermetia_F_Bayonne	80.788	13830	2333	255	211	13899	132	13778	0.0	10521
a22_Taiwan	a33_not_hermetia_F_Bayonne	91.608	143	7	2	1	143	1	138	1.35e-50	193
a22_Taiwan	a34_not_hermetia_F_Bayonne	80.788	13830	2333	255	211	13899	132	13778	0.0	10521
a22_Taiwan	a34_not_hermetia_F_Bayonne	91.608	143	7	2	1	143	1	138	1.35e-50	193
a22_Taiwan	a35_F_Lormont	96.403	13900	482	12	1	13900	1	13882	0.0	22882
a22_Taiwan	a36_F_Lormont	96.410	13900	481	12	1	13900	1	13882	0.0	22888
a22_Taiwan	a37_F_La_Force	96.410	13900	481	12	1	13900	1	13882	0.0	22888
a22_Taiwan	a38_F_St_Georges_Les_Baiilargeaux	96.403	13900	482	12	1	13900	1	13882	0.0	22882
a22_Taiwan	a39_F_Nogent_Sur_Marne	96.446	13900	476	10	1	13900	1	13882	0.0	22916
a22_Taiwan	a3_Ghana	99.993	13846	1	0	1	13846	1	13846	0.0	25564
a22_Taiwan	a40_F_Vincennes	96.437	13864	476	10	1	13864	1	13846	0.0	22849
a22_Taiwan	a41_F_Paris	96.410	13900	481	12	1	13900	1	13882	0.0	22888
a22_Taiwan	a43_F_La_Rochelle	96.408	13864	480	12	1	13864	1	13846	0.0	22827
a22_Taiwan	a44_F_Poitiers	96.410	13900	481	12	1	13900	1	13882	0.0	22888
a22_Taiwan	a45_F_Poitiers	96.403	13900	482	12	1	13900	1	13882	0.0	22882
a22_Taiwan	a46_F_Poitiers	96.410	13900	481	12	1	13900	1	13882	0.0	22888
a22_Taiwan	a47_F_Poitiers	96.410	13900	481	12	1	13900	1	13882	0.0	22888
a22_Taiwan	a48_F_Colomiers	96.458	13778	470	11	1	13778	1	13760	0.0	22724
a22_Taiwan	a49_F_Valloire_Sur_Cisse	96.410	13900	481	12	1	13900	1	13882	0.0	22888
a22_Taiwan	a4_Taiwan	96.417	13900	480	12	1	13900	1	13882	0.0	22894
a22_Taiwan	a50_F_Blois	96.410	13900	481	12	1	13900	1	13882	0.0	22888
a22_Taiwan	a51_F_Blois	96.400	13777	479	11	1	13777	1	13760	0.0	22677
a22_Taiwan	a52_F_Blois	96.411	13902	479	12	1	13900	1	13884	0.0	22890
a22_Taiwan	a53_F_Blois	96.396	13900	483	12	1	13900	1	13882	0.0	22877
a22_Taiwan	a54_F_St_Marcellin_En_Forez	96.407	13777	478	11	1	13777	1	13760	0.0	22683
a22_Taiwan	a55_F_Lormont	96.400	13777	479	11	1	13777	1	13760	0.0	22677
a22_Taiwan	a56_F_La_Rochelle	96.414	13777	477	11	1	13777	1	13760	0.0	22689
a22_Taiwan	a57_F_Paris	96.393	13777	480	11	1	13777	1	13760	0.0	22672
a22_Taiwan	a58_F_La_Rochelle	96.407	13777	478	11	1	13777	1	13760	0.0	22683
a22_Taiwan	a59_F_Bayonne	80.788	13830	2333	255	211	13899	132	13778	0.0	10521
a22_Taiwan	a59_F_Bayonne	91.608	143	7	2	1	143	1	138	1.35e-50	193
a22_Taiwan	a7_Kenya_Bondo	99.624	13847	50	2	31	13876	1	13846	0.0	25281
a22_Taiwan	a8_Taiwan	100.000	13846	0	0	31	13876	1	13846	0.0	25569
a22_Taiwan	a9_Taiwan	100.000	13760	0	0	31	13790	1	13760	0.0	25411
a22_Taiwan	ADF04_CF	99.993	13901	1	0	1	13901	1	13901	0.0	25665
a22_Taiwan	AOM17_CF	99.986	13901	1	1	1	13901	1	13900	0.0	25658
a22_Taiwan	Berkley_female	100.000	13901	0	0	1	13901	1	13901	0.0	25671
a22_Taiwan	Berkley_male_	100.000	13901	0	0	1	13901	1	13901	0.0	25671
a22_Taiwan	Mito_Uk_Cambridge	100.000	13901	0	0	1	13901	1	13901	0.0	25671
a22_Taiwan	NC_035232_ref_China	100.000	13901	0	0	1	13901	1	13901	0.0	25671
a25_Kenya_ICIPE	a10_F_Avignon	100.000	13846	0	0	31	13876	1	13846	0.0	25569
a25_Kenya_ICIPE	a11_F_Angouleme	96.392	13776	478	12	31	13804	1	13759	0.0	22668
a25_Kenya_ICIPE	a12_F_Angouleme	99.683	13900	44	0	1	13900	1	13900	0.0	25425
a25_Kenya_ICIPE	a13_F_Trescleoux	96.410	13900	481	12	1	13900	1	13882	0.0	22888
a25_Kenya_ICIPE	a14_F_Dieulefit	96.401	13864	481	12	1	13864	1	13846	0.0	22822
a25_Kenya_ICIPE	a15_Mexique	96.546	13869	450	18	1	13863	1	13846	0.0	22930
a25_Kenya_ICIPE	a16_Guyane	96.425	13901	478	12	1	13900	1	13883	0.0	22899
a25_Kenya_ICIPE	a17_Guyane	96.425	13901	478	12	1	13900	1	13883	0.0	22899
a25_Kenya_ICIPE	a18_Guyane	96.415	13864	478	12	1	13863	1	13846	0.0	22831
a25_Kenya_ICIPE	a19_Ghana_2	99.993	13760	1	0	1	13760	1	13760	0.0	25405
a25_Kenya_ICIPE	a1_Ghana	99.993	13846	1	0	1	13846	1	13846	0.0	25564
a25_Kenya_ICIPE	a20_Ghana_2	99.993	13760	1	0	1	13760	1	13760	0.0	25405
a25_Kenya_ICIPE	a21_Ghana_2	99.993	13846	1	0	1	13846	1	13846	0.0	25564
a25_Kenya_ICIPE	a22_Taiwan	100.000	13901	0	0	1	13901	1	13901	0.0	25671
a25_Kenya_ICIPE	a25_Kenya_ICIPE	100.000	13901	0	0	1	13901	1	13901	0.0	25671
a25_Kenya_ICIPE	a26_Kenya_ICIPE	99.617	13847	51	2	1	13846	1	13846	0.0	25276
a25_Kenya_ICIPE	a27_Kenya_ICIPE	100.000	13901	0	0	1	13901	1	13901	0.0	25671
a25_Kenya_ICIPE	a28_Kenya_Bondo	99.624	13847	50	2	1	13846	1	13846	0.0	25281
a25_Kenya_ICIPE	a29_F_Perigueux	96.410	13900	481	12	1	13900	1	13882	0.0	22888
a25_Kenya_ICIPE	a2_Ghana	99.993	13901	1	0	1	13901	1	13901	0.0	25665
a25_Kenya_ICIPE	a30_F_Champagne_au_mont_d_or	96.407	13777	478	11	1	13777	1	13760	0.0	22683
a25_Kenya_ICIPE	a31_F_Lyon	96.407	13777	478	11	1	13777	1	13760	0.0	22683
a25_Kenya_ICIPE	a32_F_Montpellier	96.410	13900	481	12	1	13900	1	13882	0.0	22888
a25_Kenya_ICIPE	a33_not_hermetia_F_Bayonne	80.788	13830	2333	255	211	13899	132	13778	0.0	10521
a25_Kenya_ICIPE	a33_not_hermetia_F_Bayonne	91.608	143	7	2	1	143	1	138	1.35e-50	193
a25_Kenya_ICIPE	a34_not_hermetia_F_Bayonne	80.788	13830	2333	255	211	13899	132	13778	0.0	10521
a25_Kenya_ICIPE	a34_not_hermetia_F_Bayonne	91.608	143	7	2	1	143	1	138	1.35e-50	193
a25_Kenya_ICIPE	a35_F_Lormont	96.403	13900	482	12	1	13900	1	13882	0.0	22882
a25_Kenya_ICIPE	a36_F_Lormont	96.410	13900	481	12	1	13900	1	13882	0.0	22888
a25_Kenya_ICIPE	a37_F_La_Force	96.410	13900	481	12	1	13900	1	13882	0.0	22888
a25_Kenya_ICIPE	a38_F_St_Georges_Les_Baiilargeaux	96.403	13900	482	12	1	13900	1	13882	0.0	22882
a25_Kenya_ICIPE	a39_F_Nogent_Sur_Marne	96.446	13900	476	10	1	13900	1	13882	0.0	22916
a25_Kenya_ICIPE	a3_Ghana	99.993	13846	1	0	1	13846	1	13846	0.0	25564
a25_Kenya_ICIPE	a40_F_Vincennes	96.437	13864	476	10	1	13864	1	13846	0.0	22849
a25_Kenya_ICIPE	a41_F_Paris	96.410	13900	481	12	1	13900	1	13882	0.0	22888
a25_Kenya_ICIPE	a43_F_La_Rochelle	96.408	13864	480	12	1	13864	1	13846	0.0	22827
a25_Kenya_ICIPE	a44_F_Poitiers	96.410	13900	481	12	1	13900	1	13882	0.0	22888
a25_Kenya_ICIPE	a45_F_Poitiers	96.403	13900	482	12	1	13900	1	13882	0.0	22882
a25_Kenya_ICIPE	a46_F_Poitiers	96.410	13900	481	12	1	13900	1	13882	0.0	22888
a25_Kenya_ICIPE	a47_F_Poitiers	96.410	13900	481	12	1	13900	1	13882	0.0	22888
a25_Kenya_ICIPE	a48_F_Colomiers	96.458	13778	470	11	1	13778	1	13760	0.0	22724
a25_Kenya_ICIPE	a49_F_Valloire_Sur_Cisse	96.410	13900	481	12	1	13900	1	13882	0.0	22888
a25_Kenya_ICIPE	a4_Taiwan	96.417	13900	480	12	1	13900	1	13882	0.0	22894
a25_Kenya_ICIPE	a50_F_Blois	96.410	13900	481	12	1	13900	1	13882	0.0	22888
a25_Kenya_ICIPE	a51_F_Blois	96.400	13777	479	11	1	13777	1	13760	0.0	22677
a25_Kenya_ICIPE	a52_F_Blois	96.411	13902	479	12	1	13900	1	13884	0.0	22890
a25_Kenya_ICIPE	a53_F_Blois	96.396	13900	483	12	1	13900	1	13882	0.0	22877
a25_Kenya_ICIPE	a54_F_St_Marcellin_En_Forez	96.407	13777	478	11	1	13777	1	13760	0.0	22683
a25_Kenya_ICIPE	a55_F_Lormont	96.400	13777	479	11	1	13777	1	13760	0.0	22677
a25_Kenya_ICIPE	a56_F_La_Rochelle	96.414	13777	477	11	1	13777	1	13760	0.0	22689
a25_Kenya_ICIPE	a57_F_Paris	96.393	13777	480	11	1	13777	1	13760	0.0	22672
a25_Kenya_ICIPE	a58_F_La_Rochelle	96.407	13777	478	11	1	13777	1	13760	0.0	22683
a25_Kenya_ICIPE	a59_F_Bayonne	80.788	13830	2333	255	211	13899	132	13778	0.0	10521
a25_Kenya_ICIPE	a59_F_Bayonne	91.608	143	7	2	1	143	1	138	1.35e-50	193
a25_Kenya_ICIPE	a7_Kenya_Bondo	99.624	13847	50	2	31	13876	1	13846	0.0	25281
a25_Kenya_ICIPE	a8_Taiwan	100.000	13846	0	0	31	13876	1	13846	0.0	25569
a25_Kenya_ICIPE	a9_Taiwan	100.000	13760	0	0	31	13790	1	13760	0.0	25411
a25_Kenya_ICIPE	ADF04_CF	99.993	13901	1	0	1	13901	1	13901	0.0	25665
a25_Kenya_ICIPE	AOM17_CF	99.986	13901	1	1	1	13901	1	13900	0.0	25658
a25_Kenya_ICIPE	Berkley_female	100.000	13901	0	0	1	13901	1	13901	0.0	25671
a25_Kenya_ICIPE	Berkley_male_	100.000	13901	0	0	1	13901	1	13901	0.0	25671
a25_Kenya_ICIPE	Mito_Uk_Cambridge	100.000	13901	0	0	1	13901	1	13901	0.0	25671
a25_Kenya_ICIPE	NC_035232_ref_China	100.000	13901	0	0	1	13901	1	13901	0.0	25671
a26_Kenya_ICIPE	a10_F_Avignon	99.616	13817	51	2	31	13846	1	13816	0.0	25220
a26_Kenya_ICIPE	a11_F_Angouleme	96.443	13777	469	13	31	13804	1	13759	0.0	22707
a26_Kenya_ICIPE	a12_F_Angouleme	99.733	13847	35	2	1	13846	1	13846	0.0	25364
a26_Kenya_ICIPE	a13_F_Trescleoux	96.447	13847	472	13	1	13846	1	13828	0.0	22827
a26_Kenya_ICIPE	a14_F_Dieulefit	96.447	13847	472	13	1	13846	1	13828	0.0	22827
a26_Kenya_ICIPE	a15_Mexique	96.485	13853	456	19	1	13846	1	13829	0.0	22855
a26_Kenya_ICIPE	a16_Guyane	96.447	13848	471	13	1	13846	1	13829	0.0	22827
a26_Kenya_ICIPE	a17_Guyane	96.447	13848	471	13	1	13846	1	13829	0.0	22827
a26_Kenya_ICIPE	a18_Guyane	96.447	13848	471	13	1	13846	1	13829	0.0	22827
a26_Kenya_ICIPE	a19_Ghana_2	99.608	13761	52	2	1	13760	1	13760	0.0	25111
a26_Kenya_ICIPE	a1_Ghana	99.610	13847	52	2	1	13846	1	13846	0.0	25270
a26_Kenya_ICIPE	a20_Ghana_2	99.608	13761	52	2	1	13760	1	13760	0.0	25111
a26_Kenya_ICIPE	a21_Ghana_2	99.610	13847	52	2	1	13846	1	13846	0.0	25270
a26_Kenya_ICIPE	a22_Taiwan	99.617	13847	51	2	1	13846	1	13846	0.0	25276
a26_Kenya_ICIPE	a25_Kenya_ICIPE	99.617	13847	51	2	1	13846	1	13846	0.0	25276
a26_Kenya_ICIPE	a26_Kenya_ICIPE	100.000	13846	0	0	1	13846	1	13846	0.0	25569
a26_Kenya_ICIPE	a27_Kenya_ICIPE	99.617	13847	51	2	1	13846	1	13846	0.0	25276
a26_Kenya_ICIPE	a28_Kenya_Bondo	99.993	13846	1	0	1	13846	1	13846	0.0	25564
a26_Kenya_ICIPE	a29_F_Perigueux	96.447	13847	472	13	1	13846	1	13828	0.0	22827
a26_Kenya_ICIPE	a2_Ghana	99.610	13847	52	2	1	13846	1	13846	0.0	25270
a26_Kenya_ICIPE	a30_F_Champagne_au_mont_d_or	96.458	13778	469	12	1	13777	1	13760	0.0	22722
a26_Kenya_ICIPE	a31_F_Lyon	96.458	13778	469	12	1	13777	1	13760	0.0	22722
a26_Kenya_ICIPE	a32_F_Montpellier	96.447	13847	472	13	1	13846	1	13828	0.0	22827
a26_Kenya_ICIPE	a33_not_hermetia_F_Bayonne	80.729	13777	2331	254	211	13846	132	13725	0.0	10434
a26_Kenya_ICIPE	a33_not_hermetia_F_Bayonne	91.608	143	7	2	1	143	1	138	1.35e-50	193
a26_Kenya_ICIPE	a34_not_hermetia_F_Bayonne	80.729	13777	2331	254	211	13846	132	13725	0.0	10434
a26_Kenya_ICIPE	a34_not_hermetia_F_Bayonne	91.608	143	7	2	1	143	1	138	1.35e-50	193
a26_Kenya_ICIPE	a35_F_Lormont	96.440	13847	473	13	1	13846	1	13828	0.0	22822
a26_Kenya_ICIPE	a36_F_Lormont	96.447	13847	472	13	1	13846	1	13828	0.0	22827
a26_Kenya_ICIPE	a37_F_La_Force	96.447	13847	472	13	1	13846	1	13828	0.0	22827
a26_Kenya_ICIPE	a38_F_St_Georges_Les_Baiilargeaux	96.440	13847	473	13	1	13846	1	13828	0.0	22822
a26_Kenya_ICIPE	a39_F_Nogent_Sur_Marne	96.469	13847	469	11	1	13846	1	13828	0.0	22844
a26_Kenya_ICIPE	a3_Ghana	99.610	13847	52	2	1	13846	1	13846	0.0	25270
a26_Kenya_ICIPE	a40_F_Vincennes	96.469	13847	469	11	1	13846	1	13828	0.0	22844
a26_Kenya_ICIPE	a41_F_Paris	96.447	13847	472	13	1	13846	1	13828	0.0	22827
a26_Kenya_ICIPE	a43_F_La_Rochelle	96.454	13847	471	13	1	13846	1	13828	0.0	22833
a26_Kenya_ICIPE	a44_F_Poitiers	96.447	13847	472	13	1	13846	1	13828	0.0	22827
a26_Kenya_ICIPE	a45_F_Poitiers	96.440	13847	473	13	1	13846	1	13828	0.0	22822
a26_Kenya_ICIPE	a46_F_Poitiers	96.447	13847	472	13	1	13846	1	13828	0.0	22827
a26_Kenya_ICIPE	a47_F_Poitiers	96.447	13847	472	13	1	13846	1	13828	0.0	22827
a26_Kenya_ICIPE	a48_F_Colomiers	96.531	13778	460	10	1	13778	1	13760	0.0	22779
a26_Kenya_ICIPE	a49_F_Valloire_Sur_Cisse	96.447	13847	472	13	1	13846	1	13828	0.0	22827
a26_Kenya_ICIPE	a4_Taiwan	96.454	13847	471	13	1	13846	1	13828	0.0	22833
a26_Kenya_ICIPE	a50_F_Blois	96.447	13847	472	13	1	13846	1	13828	0.0	22827
a26_Kenya_ICIPE	a51_F_Blois	96.451	13778	470	12	1	13777	1	13760	0.0	22716
a26_Kenya_ICIPE	a52_F_Blois	96.440	13849	471	12	1	13846	1	13830	0.0	22823
a26_Kenya_ICIPE	a53_F_Blois	96.432	13847	474	13	1	13846	1	13828	0.0	22816
a26_Kenya_ICIPE	a54_F_St_Marcellin_En_Forez	96.458	13778	469	12	1	13777	1	13760	0.0	22722
a26_Kenya_ICIPE	a55_F_Lormont	96.451	13778	470	12	1	13777	1	13760	0.0	22716
a26_Kenya_ICIPE	a56_F_La_Rochelle	96.465	13778	468	12	1	13777	1	13760	0.0	22727
a26_Kenya_ICIPE	a57_F_Paris	96.444	13778	471	12	1	13777	1	13760	0.0	22711
a26_Kenya_ICIPE	a58_F_La_Rochelle	96.458	13778	469	12	1	13777	1	13760	0.0	22722
a26_Kenya_ICIPE	a59_F_Bayonne	80.729	13777	2331	254	211	13846	132	13725	0.0	10434
a26_Kenya_ICIPE	a59_F_Bayonne	91.608	143	7	2	1	143	1	138	1.35e-50	193
a26_Kenya_ICIPE	a7_Kenya_Bondo	99.993	13816	1	0	31	13846	1	13816	0.0	25508
a26_Kenya_ICIPE	a8_Taiwan	99.616	13817	51	2	31	13846	1	13816	0.0	25220
a26_Kenya_ICIPE	a9_Taiwan	99.615	13761	51	2	31	13790	1	13760	0.0	25117
a26_Kenya_ICIPE	ADF04_CF	99.610	13847	52	2	1	13846	1	13846	0.0	25270
a26_Kenya_ICIPE	AOM17_CF	99.603	13847	52	3	1	13846	1	13845	0.0	25263
a26_Kenya_ICIPE	Berkley_female	99.617	13847	51	2	1	13846	1	13846	0.0	25276
a26_Kenya_ICIPE	Berkley_male_	99.617	13847	51	2	1	13846	1	13846	0.0	25276
a26_Kenya_ICIPE	Mito_Uk_Cambridge	99.617	13847	51	2	1	13846	1	13846	0.0	25276
a26_Kenya_ICIPE	NC_035232_ref_China	99.617	13847	51	2	1	13846	1	13846	0.0	25276
a27_Kenya_ICIPE	a10_F_Avignon	100.000	13846	0	0	31	13876	1	13846	0.0	25569
a27_Kenya_ICIPE	a11_F_Angouleme	96.392	13776	478	12	31	13804	1	13759	0.0	22668
a27_Kenya_ICIPE	a12_F_Angouleme	99.683	13900	44	0	1	13900	1	13900	0.0	25425
a27_Kenya_ICIPE	a13_F_Trescleoux	96.410	13900	481	12	1	13900	1	13882	0.0	22888
a27_Kenya_ICIPE	a14_F_Dieulefit	96.401	13864	481	12	1	13864	1	13846	0.0	22822
a27_Kenya_ICIPE	a15_Mexique	96.546	13869	450	18	1	13863	1	13846	0.0	22930
a27_Kenya_ICIPE	a16_Guyane	96.425	13901	478	12	1	13900	1	13883	0.0	22899
a27_Kenya_ICIPE	a17_Guyane	96.425	13901	478	12	1	13900	1	13883	0.0	22899
a27_Kenya_ICIPE	a18_Guyane	96.415	13864	478	12	1	13863	1	13846	0.0	22831
a27_Kenya_ICIPE	a19_Ghana_2	99.993	13760	1	0	1	13760	1	13760	0.0	25405
a27_Kenya_ICIPE	a1_Ghana	99.993	13846	1	0	1	13846	1	13846	0.0	25564
a27_Kenya_ICIPE	a20_Ghana_2	99.993	13760	1	0	1	13760	1	13760	0.0	25405
a27_Kenya_ICIPE	a21_Ghana_2	99.993	13846	1	0	1	13846	1	13846	0.0	25564
a27_Kenya_ICIPE	a22_Taiwan	100.000	13901	0	0	1	13901	1	13901	0.0	25671
a27_Kenya_ICIPE	a25_Kenya_ICIPE	100.000	13901	0	0	1	13901	1	13901	0.0	25671
a27_Kenya_ICIPE	a26_Kenya_ICIPE	99.617	13847	51	2	1	13846	1	13846	0.0	25276
a27_Kenya_ICIPE	a27_Kenya_ICIPE	100.000	13901	0	0	1	13901	1	13901	0.0	25671
a27_Kenya_ICIPE	a28_Kenya_Bondo	99.624	13847	50	2	1	13846	1	13846	0.0	25281
a27_Kenya_ICIPE	a29_F_Perigueux	96.410	13900	481	12	1	13900	1	13882	0.0	22888
a27_Kenya_ICIPE	a2_Ghana	99.993	13901	1	0	1	13901	1	13901	0.0	25665
a27_Kenya_ICIPE	a30_F_Champagne_au_mont_d_or	96.407	13777	478	11	1	13777	1	13760	0.0	22683
a27_Kenya_ICIPE	a31_F_Lyon	96.407	13777	478	11	1	13777	1	13760	0.0	22683
a27_Kenya_ICIPE	a32_F_Montpellier	96.410	13900	481	12	1	13900	1	13882	0.0	22888
a27_Kenya_ICIPE	a33_not_hermetia_F_Bayonne	80.788	13830	2333	255	211	13899	132	13778	0.0	10521
a27_Kenya_ICIPE	a33_not_hermetia_F_Bayonne	91.608	143	7	2	1	143	1	138	1.35e-50	193
a27_Kenya_ICIPE	a34_not_hermetia_F_Bayonne	80.788	13830	2333	255	211	13899	132	13778	0.0	10521
a27_Kenya_ICIPE	a34_not_hermetia_F_Bayonne	91.608	143	7	2	1	143	1	138	1.35e-50	193
a27_Kenya_ICIPE	a35_F_Lormont	96.403	13900	482	12	1	13900	1	13882	0.0	22882
a27_Kenya_ICIPE	a36_F_Lormont	96.410	13900	481	12	1	13900	1	13882	0.0	22888
a27_Kenya_ICIPE	a37_F_La_Force	96.410	13900	481	12	1	13900	1	13882	0.0	22888
a27_Kenya_ICIPE	a38_F_St_Georges_Les_Baiilargeaux	96.403	13900	482	12	1	13900	1	13882	0.0	22882
a27_Kenya_ICIPE	a39_F_Nogent_Sur_Marne	96.446	13900	476	10	1	13900	1	13882	0.0	22916
a27_Kenya_ICIPE	a3_Ghana	99.993	13846	1	0	1	13846	1	13846	0.0	25564
a27_Kenya_ICIPE	a40_F_Vincennes	96.437	13864	476	10	1	13864	1	13846	0.0	22849
a27_Kenya_ICIPE	a41_F_Paris	96.410	13900	481	12	1	13900	1	13882	0.0	22888
a27_Kenya_ICIPE	a43_F_La_Rochelle	96.408	13864	480	12	1	13864	1	13846	0.0	22827
a27_Kenya_ICIPE	a44_F_Poitiers	96.410	13900	481	12	1	13900	1	13882	0.0	22888
a27_Kenya_ICIPE	a45_F_Poitiers	96.403	13900	482	12	1	13900	1	13882	0.0	22882
a27_Kenya_ICIPE	a46_F_Poitiers	96.410	13900	481	12	1	13900	1	13882	0.0	22888
a27_Kenya_ICIPE	a47_F_Poitiers	96.410	13900	481	12	1	13900	1	13882	0.0	22888
a27_Kenya_ICIPE	a48_F_Colomiers	96.458	13778	470	11	1	13778	1	13760	0.0	22724
a27_Kenya_ICIPE	a49_F_Valloire_Sur_Cisse	96.410	13900	481	12	1	13900	1	13882	0.0	22888
a27_Kenya_ICIPE	a4_Taiwan	96.417	13900	480	12	1	13900	1	13882	0.0	22894
a27_Kenya_ICIPE	a50_F_Blois	96.410	13900	481	12	1	13900	1	13882	0.0	22888
a27_Kenya_ICIPE	a51_F_Blois	96.400	13777	479	11	1	13777	1	13760	0.0	22677
a27_Kenya_ICIPE	a52_F_Blois	96.411	13902	479	12	1	13900	1	13884	0.0	22890
a27_Kenya_ICIPE	a53_F_Blois	96.396	13900	483	12	1	13900	1	13882	0.0	22877
a27_Kenya_ICIPE	a54_F_St_Marcellin_En_Forez	96.407	13777	478	11	1	13777	1	13760	0.0	22683
a27_Kenya_ICIPE	a55_F_Lormont	96.400	13777	479	11	1	13777	1	13760	0.0	22677
a27_Kenya_ICIPE	a56_F_La_Rochelle	96.414	13777	477	11	1	13777	1	13760	0.0	22689
a27_Kenya_ICIPE	a57_F_Paris	96.393	13777	480	11	1	13777	1	13760	0.0	22672
a27_Kenya_ICIPE	a58_F_La_Rochelle	96.407	13777	478	11	1	13777	1	13760	0.0	22683
a27_Kenya_ICIPE	a59_F_Bayonne	80.788	13830	2333	255	211	13899	132	13778	0.0	10521
a27_Kenya_ICIPE	a59_F_Bayonne	91.608	143	7	2	1	143	1	138	1.35e-50	193
a27_Kenya_ICIPE	a7_Kenya_Bondo	99.624	13847	50	2	31	13876	1	13846	0.0	25281
a27_Kenya_ICIPE	a8_Taiwan	100.000	13846	0	0	31	13876	1	13846	0.0	25569
a27_Kenya_ICIPE	a9_Taiwan	100.000	13760	0	0	31	13790	1	13760	0.0	25411
a27_Kenya_ICIPE	ADF04_CF	99.993	13901	1	0	1	13901	1	13901	0.0	25665
a27_Kenya_ICIPE	AOM17_CF	99.986	13901	1	1	1	13901	1	13900	0.0	25658
a27_Kenya_ICIPE	Berkley_female	100.000	13901	0	0	1	13901	1	13901	0.0	25671
a27_Kenya_ICIPE	Berkley_male_	100.000	13901	0	0	1	13901	1	13901	0.0	25671
a27_Kenya_ICIPE	Mito_Uk_Cambridge	100.000	13901	0	0	1	13901	1	13901	0.0	25671
a27_Kenya_ICIPE	NC_035232_ref_China	100.000	13901	0	0	1	13901	1	13901	0.0	25671
a28_Kenya_Bondo	a10_F_Avignon	99.624	13817	50	2	31	13846	1	13816	0.0	25226
a28_Kenya_Bondo	a11_F_Angouleme	96.451	13777	468	13	31	13804	1	13759	0.0	22713
a28_Kenya_Bondo	a12_F_Angouleme	99.740	13847	34	2	1	13846	1	13846	0.0	25370
a28_Kenya_Bondo	a13_F_Trescleoux	96.454	13847	471	13	1	13846	1	13828	0.0	22833
a28_Kenya_Bondo	a14_F_Dieulefit	96.454	13847	471	13	1	13846	1	13828	0.0	22833
a28_Kenya_Bondo	a15_Mexique	96.492	13853	455	19	1	13846	1	13829	0.0	22860
a28_Kenya_Bondo	a16_Guyane	96.454	13848	470	13	1	13846	1	13829	0.0	22833
a28_Kenya_Bondo	a17_Guyane	96.454	13848	470	13	1	13846	1	13829	0.0	22833
a28_Kenya_Bondo	a18_Guyane	96.454	13848	470	13	1	13846	1	13829	0.0	22833
a28_Kenya_Bondo	a19_Ghana_2	99.615	13761	51	2	1	13760	1	13760	0.0	25117
a28_Kenya_Bondo	a1_Ghana	99.617	13847	51	2	1	13846	1	13846	0.0	25276
a28_Kenya_Bondo	a20_Ghana_2	99.615	13761	51	2	1	13760	1	13760	0.0	25117
a28_Kenya_Bondo	a21_Ghana_2	99.617	13847	51	2	1	13846	1	13846	0.0	25276
a28_Kenya_Bondo	a22_Taiwan	99.624	13847	50	2	1	13846	1	13846	0.0	25281
a28_Kenya_Bondo	a25_Kenya_ICIPE	99.624	13847	50	2	1	13846	1	13846	0.0	25281
a28_Kenya_Bondo	a26_Kenya_ICIPE	99.993	13846	1	0	1	13846	1	13846	0.0	25564
a28_Kenya_Bondo	a27_Kenya_ICIPE	99.624	13847	50	2	1	13846	1	13846	0.0	25281
a28_Kenya_Bondo	a28_Kenya_Bondo	100.000	13846	0	0	1	13846	1	13846	0.0	25569
a28_Kenya_Bondo	a29_F_Perigueux	96.454	13847	471	13	1	13846	1	13828	0.0	22833
a28_Kenya_Bondo	a2_Ghana	99.617	13847	51	2	1	13846	1	13846	0.0	25276
a28_Kenya_Bondo	a30_F_Champagne_au_mont_d_or	96.465	13778	468	12	1	13777	1	13760	0.0	22727
a28_Kenya_Bondo	a31_F_Lyon	96.465	13778	468	12	1	13777	1	13760	0.0	22727
a28_Kenya_Bondo	a32_F_Montpellier	96.454	13847	471	13	1	13846	1	13828	0.0	22833
a28_Kenya_Bondo	a33_not_hermetia_F_Bayonne	80.736	13777	2330	254	211	13846	132	13725	0.0	10440
a28_Kenya_Bondo	a33_not_hermetia_F_Bayonne	91.608	143	7	2	1	143	1	138	1.35e-50	193
a28_Kenya_Bondo	a34_not_hermetia_F_Bayonne	80.736	13777	2330	254	211	13846	132	13725	0.0	10440
a28_Kenya_Bondo	a34_not_hermetia_F_Bayonne	91.608	143	7	2	1	143	1	138	1.35e-50	193
a28_Kenya_Bondo	a35_F_Lormont	96.447	13847	472	13	1	13846	1	13828	0.0	22827
a28_Kenya_Bondo	a36_F_Lormont	96.454	13847	471	13	1	13846	1	13828	0.0	22833
a28_Kenya_Bondo	a37_F_La_Force	96.454	13847	471	13	1	13846	1	13828	0.0	22833
a28_Kenya_Bondo	a38_F_St_Georges_Les_Baiilargeaux	96.447	13847	472	13	1	13846	1	13828	0.0	22827
a28_Kenya_Bondo	a39_F_Nogent_Sur_Marne	96.476	13847	468	11	1	13846	1	13828	0.0	22849
a28_Kenya_Bondo	a3_Ghana	99.617	13847	51	2	1	13846	1	13846	0.0	25276
a28_Kenya_Bondo	a40_F_Vincennes	96.476	13847	468	11	1	13846	1	13828	0.0	22849
a28_Kenya_Bondo	a41_F_Paris	96.454	13847	471	13	1	13846	1	13828	0.0	22833
a28_Kenya_Bondo	a43_F_La_Rochelle	96.461	13847	470	13	1	13846	1	13828	0.0	22838
a28_Kenya_Bondo	a44_F_Poitiers	96.454	13847	471	13	1	13846	1	13828	0.0	22833
a28_Kenya_Bondo	a45_F_Poitiers	96.447	13847	472	13	1	13846	1	13828	0.0	22827
a28_Kenya_Bondo	a46_F_Poitiers	96.454	13847	471	13	1	13846	1	13828	0.0	22833
a28_Kenya_Bondo	a47_F_Poitiers	96.454	13847	471	13	1	13846	1	13828	0.0	22833
a28_Kenya_Bondo	a48_F_Colomiers	96.538	13778	459	10	1	13778	1	13760	0.0	22785
a28_Kenya_Bondo	a49_F_Valloire_Sur_Cisse	96.454	13847	471	13	1	13846	1	13828	0.0	22833
a28_Kenya_Bondo	a4_Taiwan	96.461	13847	470	13	1	13846	1	13828	0.0	22838
a28_Kenya_Bondo	a50_F_Blois	96.454	13847	471	13	1	13846	1	13828	0.0	22833
a28_Kenya_Bondo	a51_F_Blois	96.458	13778	469	12	1	13777	1	13760	0.0	22722
a28_Kenya_Bondo	a52_F_Blois	96.447	13849	470	12	1	13846	1	13830	0.0	22829
a28_Kenya_Bondo	a53_F_Blois	96.440	13847	473	13	1	13846	1	13828	0.0	22822
a28_Kenya_Bondo	a54_F_St_Marcellin_En_Forez	96.465	13778	468	12	1	13777	1	13760	0.0	22727
a28_Kenya_Bondo	a55_F_Lormont	96.458	13778	469	12	1	13777	1	13760	0.0	22722
a28_Kenya_Bondo	a56_F_La_Rochelle	96.473	13778	467	12	1	13777	1	13760	0.0	22733
a28_Kenya_Bondo	a57_F_Paris	96.451	13778	470	12	1	13777	1	13760	0.0	22716
a28_Kenya_Bondo	a58_F_La_Rochelle	96.465	13778	468	12	1	13777	1	13760	0.0	22727
a28_Kenya_Bondo	a59_F_Bayonne	80.736	13777	2330	254	211	13846	132	13725	0.0	10440
a28_Kenya_Bondo	a59_F_Bayonne	91.608	143	7	2	1	143	1	138	1.35e-50	193
a28_Kenya_Bondo	a7_Kenya_Bondo	100.000	13816	0	0	31	13846	1	13816	0.0	25514
a28_Kenya_Bondo	a8_Taiwan	99.624	13817	50	2	31	13846	1	13816	0.0	25226
a28_Kenya_Bondo	a9_Taiwan	99.622	13761	50	2	31	13790	1	13760	0.0	25122
a28_Kenya_Bondo	ADF04_CF	99.617	13847	51	2	1	13846	1	13846	0.0	25276
a28_Kenya_Bondo	AOM17_CF	99.610	13847	51	3	1	13846	1	13845	0.0	25268
a28_Kenya_Bondo	Berkley_female	99.624	13847	50	2	1	13846	1	13846	0.0	25281
a28_Kenya_Bondo	Berkley_male_	99.624	13847	50	2	1	13846	1	13846	0.0	25281
a28_Kenya_Bondo	Mito_Uk_Cambridge	99.624	13847	50	2	1	13846	1	13846	0.0	25281
a28_Kenya_Bondo	NC_035232_ref_China	99.624	13847	50	2	1	13846	1	13846	0.0	25281
a29_F_Perigueux	a10_F_Avignon	96.396	13846	481	12	31	13858	1	13846	0.0	22788
a29_F_Perigueux	a11_F_Angouleme	99.985	13760	0	1	31	13788	1	13760	0.0	25398
a29_F_Perigueux	a12_F_Angouleme	96.482	13900	471	12	1	13882	1	13900	0.0	22943
a29_F_Perigueux	a13_F_Trescleoux	100.000	13883	0	0	1	13883	1	13883	0.0	25638
a29_F_Perigueux	a14_F_Dieulefit	100.000	13846	0	0	1	13846	1	13846	0.0	25569
a29_F_Perigueux	a15_Mexique	97.820	13852	289	10	1	13845	1	13846	0.0	23894
a29_F_Perigueux	a16_Guyane	99.258	13884	102	1	1	13883	1	13884	0.0	25067
a29_F_Perigueux	a17_Guyane	99.258	13884	102	1	1	13883	1	13884	0.0	25067
a29_F_Perigueux	a18_Guyane	99.256	13846	102	1	1	13845	1	13846	0.0	24997
a29_F_Perigueux	a19_Ghana_2	96.395	13760	479	11	1	13743	1	13760	0.0	22646
a29_F_Perigueux	a1_Ghana	96.389	13846	482	12	1	13828	1	13846	0.0	22783
a29_F_Perigueux	a20_Ghana_2	96.395	13760	479	11	1	13743	1	13760	0.0	22646
a29_F_Perigueux	a21_Ghana_2	96.389	13846	482	12	1	13828	1	13846	0.0	22783
a29_F_Perigueux	a22_Taiwan	96.410	13900	481	12	1	13882	1	13900	0.0	22888
a29_F_Perigueux	a25_Kenya_ICIPE	96.410	13900	481	12	1	13882	1	13900	0.0	22888
a29_F_Perigueux	a26_Kenya_ICIPE	96.447	13847	472	13	1	13828	1	13846	0.0	22827
a29_F_Perigueux	a27_Kenya_ICIPE	96.410	13900	481	12	1	13882	1	13900	0.0	22888
a29_F_Perigueux	a28_Kenya_Bondo	96.454	13847	471	13	1	13828	1	13846	0.0	22833
a29_F_Perigueux	a29_F_Perigueux	100.000	13883	0	0	1	13883	1	13883	0.0	25638
a29_F_Perigueux	a2_Ghana	96.403	13900	482	12	1	13882	1	13900	0.0	22882
a29_F_Perigueux	a30_F_Champagne_au_mont_d_or	100.000	13760	0	0	1	13760	1	13760	0.0	25411
a29_F_Perigueux	a31_F_Lyon	99.993	13760	1	0	1	13760	1	13760	0.0	25405
a29_F_Perigueux	a32_F_Montpellier	100.000	13883	0	0	1	13883	1	13883	0.0	25638
a29_F_Perigueux	a33_not_hermetia_F_Bayonne	81.533	12709	2070	204	1296	13881	1224	13778	0.0	10211
a29_F_Perigueux	a34_not_hermetia_F_Bayonne	81.533	12709	2070	204	1296	13881	1224	13778	0.0	10211
a29_F_Perigueux	a35_F_Lormont	99.993	13883	1	0	1	13883	1	13883	0.0	25632
a29_F_Perigueux	a36_F_Lormont	100.000	13883	0	0	1	13883	1	13883	0.0	25638
a29_F_Perigueux	a37_F_La_Force	100.000	13883	0	0	1	13883	1	13883	0.0	25638
a29_F_Perigueux	a38_F_St_Georges_Les_Baiilargeaux	99.993	13883	1	0	1	13883	1	13883	0.0	25632
a29_F_Perigueux	a39_F_Nogent_Sur_Marne	99.309	13883	96	0	1	13883	1	13883	0.0	25106
a29_F_Perigueux	a3_Ghana	96.389	13846	482	12	1	13828	1	13846	0.0	22783
a29_F_Perigueux	a40_F_Vincennes	99.307	13846	96	0	1	13846	1	13846	0.0	25037
a29_F_Perigueux	a41_F_Paris	100.000	13883	0	0	1	13883	1	13883	0.0	25638
a29_F_Perigueux	a43_F_La_Rochelle	99.993	13846	1	0	1	13846	1	13846	0.0	25564
a29_F_Perigueux	a44_F_Poitiers	100.000	13883	0	0	1	13883	1	13883	0.0	25638
a29_F_Perigueux	a45_F_Poitiers	99.993	13883	1	0	1	13883	1	13883	0.0	25632
a29_F_Perigueux	a46_F_Poitiers	100.000	13883	0	0	1	13883	1	13883	0.0	25638
a29_F_Perigueux	a47_F_Poitiers	100.000	13883	0	0	1	13883	1	13883	0.0	25638
a29_F_Perigueux	a48_F_Colomiers	99.113	13761	121	1	1	13761	1	13760	0.0	24735
a29_F_Perigueux	a49_F_Valloire_Sur_Cisse	100.000	13883	0	0	1	13883	1	13883	0.0	25638
a29_F_Perigueux	a4_Taiwan	99.993	13883	1	0	1	13883	1	13883	0.0	25632
a29_F_Perigueux	a50_F_Blois	100.000	13883	0	0	1	13883	1	13883	0.0	25638
a29_F_Perigueux	a51_F_Blois	99.993	13760	1	0	1	13760	1	13760	0.0	25405
a29_F_Perigueux	a52_F_Blois	99.294	13885	96	1	1	13883	1	13885	0.0	25097
a29_F_Perigueux	a53_F_Blois	99.986	13883	2	0	1	13883	1	13883	0.0	25627
a29_F_Perigueux	a54_F_St_Marcellin_En_Forez	100.000	13760	0	0	1	13760	1	13760	0.0	25411
a29_F_Perigueux	a55_F_Lormont	99.993	13760	1	0	1	13760	1	13760	0.0	25405
a29_F_Perigueux	a56_F_La_Rochelle	99.993	13760	1	0	1	13760	1	13760	0.0	25405
a29_F_Perigueux	a57_F_Paris	99.985	13760	2	0	1	13760	1	13760	0.0	25399
a29_F_Perigueux	a58_F_La_Rochelle	100.000	13760	0	0	1	13760	1	13760	0.0	25411
a29_F_Perigueux	a59_F_Bayonne	81.533	12709	2070	204	1296	13881	1224	13778	0.0	10211
a29_F_Perigueux	a7_Kenya_Bondo	96.454	13847	471	13	31	13858	1	13846	0.0	22833
a29_F_Perigueux	a8_Taiwan	96.396	13846	481	12	31	13858	1	13846	0.0	22788
a29_F_Perigueux	a9_Taiwan	96.403	13760	478	11	31	13773	1	13760	0.0	22652
a29_F_Perigueux	ADF04_CF	96.403	13900	482	12	1	13882	1	13900	0.0	22882
a29_F_Perigueux	AOM17_CF	96.396	13900	482	13	1	13882	1	13899	0.0	22875
a29_F_Perigueux	Berkley_female	96.410	13900	481	12	1	13882	1	13900	0.0	22888
a29_F_Perigueux	Berkley_male_	96.410	13900	481	12	1	13882	1	13900	0.0	22888
a29_F_Perigueux	Mito_Uk_Cambridge	96.410	13900	481	12	1	13882	1	13900	0.0	22888
a29_F_Perigueux	NC_035232_ref_China	96.410	13900	481	12	1	13882	1	13900	0.0	22888
a2_Ghana	a10_F_Avignon	99.993	13846	1	0	31	13876	1	13846	0.0	25564
a2_Ghana	a11_F_Angouleme	96.385	13776	479	12	31	13804	1	13759	0.0	22663
a2_Ghana	a12_F_Angouleme	99.676	13900	45	0	1	13900	1	13900	0.0	25420
a2_Ghana	a13_F_Trescleoux	96.403	13900	482	12	1	13900	1	13882	0.0	22882
a2_Ghana	a14_F_Dieulefit	96.394	13864	482	12	1	13864	1	13846	0.0	22816
a2_Ghana	a15_Mexique	96.539	13869	451	18	1	13863	1	13846	0.0	22925
a2_Ghana	a16_Guyane	96.418	13901	479	12	1	13900	1	13883	0.0	22894
a2_Ghana	a17_Guyane	96.418	13901	479	12	1	13900	1	13883	0.0	22894
a2_Ghana	a18_Guyane	96.408	13864	479	12	1	13863	1	13846	0.0	22825
a2_Ghana	a19_Ghana_2	100.000	13760	0	0	1	13760	1	13760	0.0	25411
a2_Ghana	a1_Ghana	100.000	13846	0	0	1	13846	1	13846	0.0	25569
a2_Ghana	a20_Ghana_2	100.000	13760	0	0	1	13760	1	13760	0.0	25411
a2_Ghana	a21_Ghana_2	100.000	13846	0	0	1	13846	1	13846	0.0	25569
a2_Ghana	a22_Taiwan	99.993	13901	1	0	1	13901	1	13901	0.0	25665
a2_Ghana	a25_Kenya_ICIPE	99.993	13901	1	0	1	13901	1	13901	0.0	25665
a2_Ghana	a26_Kenya_ICIPE	99.610	13847	52	2	1	13846	1	13846	0.0	25270
a2_Ghana	a27_Kenya_ICIPE	99.993	13901	1	0	1	13901	1	13901	0.0	25665
a2_Ghana	a28_Kenya_Bondo	99.617	13847	51	2	1	13846	1	13846	0.0	25276
a2_Ghana	a29_F_Perigueux	96.403	13900	482	12	1	13900	1	13882	0.0	22882
a2_Ghana	a2_Ghana	100.000	13901	0	0	1	13901	1	13901	0.0	25671
a2_Ghana	a30_F_Champagne_au_mont_d_or	96.400	13777	479	11	1	13777	1	13760	0.0	22677
a2_Ghana	a31_F_Lyon	96.400	13777	479	11	1	13777	1	13760	0.0	22677
a2_Ghana	a32_F_Montpellier	96.403	13900	482	12	1	13900	1	13882	0.0	22882
a2_Ghana	a33_not_hermetia_F_Bayonne	80.780	13829	2336	253	211	13899	132	13778	0.0	10515
a2_Ghana	a33_not_hermetia_F_Bayonne	91.608	143	7	2	1	143	1	138	1.35e-50	193
a2_Ghana	a34_not_hermetia_F_Bayonne	80.780	13829	2336	253	211	13899	132	13778	0.0	10515
a2_Ghana	a34_not_hermetia_F_Bayonne	91.608	143	7	2	1	143	1	138	1.35e-50	193
a2_Ghana	a35_F_Lormont	96.396	13900	483	12	1	13900	1	13882	0.0	22877
a2_Ghana	a36_F_Lormont	96.403	13900	482	12	1	13900	1	13882	0.0	22882
a2_Ghana	a37_F_La_Force	96.403	13900	482	12	1	13900	1	13882	0.0	22882
a2_Ghana	a38_F_St_Georges_Les_Baiilargeaux	96.396	13900	483	12	1	13900	1	13882	0.0	22877
a2_Ghana	a39_F_Nogent_Sur_Marne	96.439	13900	477	10	1	13900	1	13882	0.0	22910
a2_Ghana	a3_Ghana	100.000	13846	0	0	1	13846	1	13846	0.0	25569
a2_Ghana	a40_F_Vincennes	96.430	13864	477	10	1	13864	1	13846	0.0	22844
a2_Ghana	a41_F_Paris	96.403	13900	482	12	1	13900	1	13882	0.0	22882
a2_Ghana	a43_F_La_Rochelle	96.401	13864	481	12	1	13864	1	13846	0.0	22822
a2_Ghana	a44_F_Poitiers	96.403	13900	482	12	1	13900	1	13882	0.0	22882
a2_Ghana	a45_F_Poitiers	96.396	13900	483	12	1	13900	1	13882	0.0	22877
a2_Ghana	a46_F_Poitiers	96.403	13900	482	12	1	13900	1	13882	0.0	22882
a2_Ghana	a47_F_Poitiers	96.403	13900	482	12	1	13900	1	13882	0.0	22882
a2_Ghana	a48_F_Colomiers	96.451	13778	471	11	1	13778	1	13760	0.0	22718
a2_Ghana	a49_F_Valloire_Sur_Cisse	96.403	13900	482	12	1	13900	1	13882	0.0	22882
a2_Ghana	a4_Taiwan	96.410	13900	481	12	1	13900	1	13882	0.0	22888
a2_Ghana	a50_F_Blois	96.403	13900	482	12	1	13900	1	13882	0.0	22882
a2_Ghana	a51_F_Blois	96.393	13777	480	11	1	13777	1	13760	0.0	22672
a2_Ghana	a52_F_Blois	96.403	13902	480	12	1	13900	1	13884	0.0	22884
a2_Ghana	a53_F_Blois	96.388	13900	484	12	1	13900	1	13882	0.0	22871
a2_Ghana	a54_F_St_Marcellin_En_Forez	96.400	13777	479	11	1	13777	1	13760	0.0	22677
a2_Ghana	a55_F_Lormont	96.393	13777	480	11	1	13777	1	13760	0.0	22672
a2_Ghana	a56_F_La_Rochelle	96.407	13777	478	11	1	13777	1	13760	0.0	22683
a2_Ghana	a57_F_Paris	96.385	13777	481	11	1	13777	1	13760	0.0	22666
a2_Ghana	a58_F_La_Rochelle	96.400	13777	479	11	1	13777	1	13760	0.0	22677
a2_Ghana	a59_F_Bayonne	80.780	13829	2336	253	211	13899	132	13778	0.0	10515
a2_Ghana	a59_F_Bayonne	91.608	143	7	2	1	143	1	138	1.35e-50	193
a2_Ghana	a7_Kenya_Bondo	99.617	13847	51	2	31	13876	1	13846	0.0	25276
a2_Ghana	a8_Taiwan	99.993	13846	1	0	31	13876	1	13846	0.0	25564
a2_Ghana	a9_Taiwan	99.993	13760	1	0	31	13790	1	13760	0.0	25405
a2_Ghana	ADF04_CF	100.000	13901	0	0	1	13901	1	13901	0.0	25671
a2_Ghana	AOM17_CF	99.993	13901	0	1	1	13901	1	13900	0.0	25664
a2_Ghana	Berkley_female	99.993	13901	1	0	1	13901	1	13901	0.0	25665
a2_Ghana	Berkley_male_	99.993	13901	1	0	1	13901	1	13901	0.0	25665
a2_Ghana	Mito_Uk_Cambridge	99.993	13901	1	0	1	13901	1	13901	0.0	25665
a2_Ghana	NC_035232_ref_China	99.993	13901	1	0	1	13901	1	13901	0.0	25665
a30_F_Champagne_au_mont_d_or	a10_F_Avignon	96.399	13747	478	11	31	13760	1	13747	0.0	22628
a30_F_Champagne_au_mont_d_or	a11_F_Angouleme	99.985	13732	0	1	31	13760	1	13732	0.0	25346
a30_F_Champagne_au_mont_d_or	a12_F_Angouleme	96.480	13777	468	11	1	13760	1	13777	0.0	22738
a30_F_Champagne_au_mont_d_or	a13_F_Trescleoux	100.000	13760	0	0	1	13760	1	13760	0.0	25411
a30_F_Champagne_au_mont_d_or	a14_F_Dieulefit	100.000	13760	0	0	1	13760	1	13760	0.0	25411
a30_F_Champagne_au_mont_d_or	a15_Mexique	97.806	13767	289	10	1	13760	1	13761	0.0	23737
a30_F_Champagne_au_mont_d_or	a16_Guyane	99.252	13761	102	1	1	13760	1	13761	0.0	24840
a30_F_Champagne_au_mont_d_or	a17_Guyane	99.252	13761	102	1	1	13760	1	13761	0.0	24840
a30_F_Champagne_au_mont_d_or	a18_Guyane	99.252	13761	102	1	1	13760	1	13761	0.0	24840
a30_F_Champagne_au_mont_d_or	a19_Ghana_2	96.395	13760	479	11	1	13743	1	13760	0.0	22646
a30_F_Champagne_au_mont_d_or	a1_Ghana	96.400	13777	479	11	1	13760	1	13777	0.0	22677
a30_F_Champagne_au_mont_d_or	a20_Ghana_2	96.395	13760	479	11	1	13743	1	13760	0.0	22646
a30_F_Champagne_au_mont_d_or	a21_Ghana_2	96.400	13777	479	11	1	13760	1	13777	0.0	22677
a30_F_Champagne_au_mont_d_or	a22_Taiwan	96.407	13777	478	11	1	13760	1	13777	0.0	22683
a30_F_Champagne_au_mont_d_or	a25_Kenya_ICIPE	96.407	13777	478	11	1	13760	1	13777	0.0	22683
a30_F_Champagne_au_mont_d_or	a26_Kenya_ICIPE	96.458	13778	469	12	1	13760	1	13777	0.0	22722
a30_F_Champagne_au_mont_d_or	a27_Kenya_ICIPE	96.407	13777	478	11	1	13760	1	13777	0.0	22683
a30_F_Champagne_au_mont_d_or	a28_Kenya_Bondo	96.465	13778	468	12	1	13760	1	13777	0.0	22727
a30_F_Champagne_au_mont_d_or	a29_F_Perigueux	100.000	13760	0	0	1	13760	1	13760	0.0	25411
a30_F_Champagne_au_mont_d_or	a2_Ghana	96.400	13777	479	11	1	13760	1	13777	0.0	22677
a30_F_Champagne_au_mont_d_or	a30_F_Champagne_au_mont_d_or	100.000	13760	0	0	1	13760	1	13760	0.0	25411
a30_F_Champagne_au_mont_d_or	a31_F_Lyon	99.993	13760	1	0	1	13760	1	13760	0.0	25405
a30_F_Champagne_au_mont_d_or	a32_F_Montpellier	100.000	13760	0	0	1	13760	1	13760	0.0	25411
a30_F_Champagne_au_mont_d_or	a33_not_hermetia_F_Bayonne	81.526	12585	2051	202	1296	13760	1224	13654	0.0	10107
a30_F_Champagne_au_mont_d_or	a34_not_hermetia_F_Bayonne	81.526	12585	2051	202	1296	13760	1224	13654	0.0	10107
a30_F_Champagne_au_mont_d_or	a35_F_Lormont	99.993	13760	1	0	1	13760	1	13760	0.0	25405
a30_F_Champagne_au_mont_d_or	a36_F_Lormont	100.000	13760	0	0	1	13760	1	13760	0.0	25411
a30_F_Champagne_au_mont_d_or	a37_F_La_Force	100.000	13760	0	0	1	13760	1	13760	0.0	25411
a30_F_Champagne_au_mont_d_or	a38_F_St_Georges_Les_Baiilargeaux	99.993	13760	1	0	1	13760	1	13760	0.0	25405
a30_F_Champagne_au_mont_d_or	a39_F_Nogent_Sur_Marne	99.302	13760	96	0	1	13760	1	13760	0.0	24879
a30_F_Champagne_au_mont_d_or	a3_Ghana	96.400	13777	479	11	1	13760	1	13777	0.0	22677
a30_F_Champagne_au_mont_d_or	a40_F_Vincennes	99.302	13760	96	0	1	13760	1	13760	0.0	24879
a30_F_Champagne_au_mont_d_or	a41_F_Paris	100.000	13760	0	0	1	13760	1	13760	0.0	25411
a30_F_Champagne_au_mont_d_or	a43_F_La_Rochelle	99.993	13760	1	0	1	13760	1	13760	0.0	25405
a30_F_Champagne_au_mont_d_or	a44_F_Poitiers	100.000	13760	0	0	1	13760	1	13760	0.0	25411
a30_F_Champagne_au_mont_d_or	a45_F_Poitiers	99.993	13760	1	0	1	13760	1	13760	0.0	25405
a30_F_Champagne_au_mont_d_or	a46_F_Poitiers	100.000	13760	0	0	1	13760	1	13760	0.0	25411
a30_F_Champagne_au_mont_d_or	a47_F_Poitiers	100.000	13760	0	0	1	13760	1	13760	0.0	25411
a30_F_Champagne_au_mont_d_or	a48_F_Colomiers	99.113	13760	121	1	1	13760	1	13759	0.0	24733
a30_F_Champagne_au_mont_d_or	a49_F_Valloire_Sur_Cisse	100.000	13760	0	0	1	13760	1	13760	0.0	25411
a30_F_Champagne_au_mont_d_or	a4_Taiwan	99.993	13760	1	0	1	13760	1	13760	0.0	25405
a30_F_Champagne_au_mont_d_or	a50_F_Blois	100.000	13760	0	0	1	13760	1	13760	0.0	25411
a30_F_Champagne_au_mont_d_or	a51_F_Blois	99.993	13760	1	0	1	13760	1	13760	0.0	25405
a30_F_Champagne_au_mont_d_or	a52_F_Blois	99.288	13762	96	1	1	13760	1	13762	0.0	24869
a30_F_Champagne_au_mont_d_or	a53_F_Blois	99.985	13760	2	0	1	13760	1	13760	0.0	25399
a30_F_Champagne_au_mont_d_or	a54_F_St_Marcellin_En_Forez	100.000	13760	0	0	1	13760	1	13760	0.0	25411
a30_F_Champagne_au_mont_d_or	a55_F_Lormont	99.993	13760	1	0	1	13760	1	13760	0.0	25405
a30_F_Champagne_au_mont_d_or	a56_F_La_Rochelle	99.993	13760	1	0	1	13760	1	13760	0.0	25405
a30_F_Champagne_au_mont_d_or	a57_F_Paris	99.985	13760	2	0	1	13760	1	13760	0.0	25399
a30_F_Champagne_au_mont_d_or	a58_F_La_Rochelle	100.000	13760	0	0	1	13760	1	13760	0.0	25411
a30_F_Champagne_au_mont_d_or	a59_F_Bayonne	81.526	12585	2051	202	1296	13760	1224	13654	0.0	10107
a30_F_Champagne_au_mont_d_or	a7_Kenya_Bondo	96.458	13748	468	12	31	13760	1	13747	0.0	22672
a30_F_Champagne_au_mont_d_or	a8_Taiwan	96.399	13747	478	11	31	13760	1	13747	0.0	22628
a30_F_Champagne_au_mont_d_or	a9_Taiwan	96.399	13747	478	11	31	13760	1	13747	0.0	22628
a30_F_Champagne_au_mont_d_or	ADF04_CF	96.400	13777	479	11	1	13760	1	13777	0.0	22677
a30_F_Champagne_au_mont_d_or	AOM17_CF	96.393	13777	479	12	1	13760	1	13776	0.0	22672
a30_F_Champagne_au_mont_d_or	Berkley_female	96.407	13777	478	11	1	13760	1	13777	0.0	22683
a30_F_Champagne_au_mont_d_or	Berkley_male_	96.407	13777	478	11	1	13760	1	13777	0.0	22683
a30_F_Champagne_au_mont_d_or	Mito_Uk_Cambridge	96.407	13777	478	11	1	13760	1	13777	0.0	22683
a30_F_Champagne_au_mont_d_or	NC_035232_ref_China	96.407	13777	478	11	1	13760	1	13777	0.0	22683
a31_F_Lyon	a10_F_Avignon	96.399	13747	478	11	31	13760	1	13747	0.0	22628
a31_F_Lyon	a11_F_Angouleme	99.978	13732	1	1	31	13760	1	13732	0.0	25340
a31_F_Lyon	a12_F_Angouleme	96.480	13777	468	11	1	13760	1	13777	0.0	22738
a31_F_Lyon	a13_F_Trescleoux	99.993	13760	1	0	1	13760	1	13760	0.0	25405
a31_F_Lyon	a14_F_Dieulefit	99.993	13760	1	0	1	13760	1	13760	0.0	25405
a31_F_Lyon	a15_Mexique	97.799	13767	290	10	1	13760	1	13761	0.0	23732
a31_F_Lyon	a16_Guyane	99.244	13761	103	1	1	13760	1	13761	0.0	24834
a31_F_Lyon	a17_Guyane	99.244	13761	103	1	1	13760	1	13761	0.0	24834
a31_F_Lyon	a18_Guyane	99.244	13761	103	1	1	13760	1	13761	0.0	24834
a31_F_Lyon	a19_Ghana_2	96.395	13760	479	11	1	13743	1	13760	0.0	22646
a31_F_Lyon	a1_Ghana	96.400	13777	479	11	1	13760	1	13777	0.0	22677
a31_F_Lyon	a20_Ghana_2	96.395	13760	479	11	1	13743	1	13760	0.0	22646
a31_F_Lyon	a21_Ghana_2	96.400	13777	479	11	1	13760	1	13777	0.0	22677
a31_F_Lyon	a22_Taiwan	96.407	13777	478	11	1	13760	1	13777	0.0	22683
a31_F_Lyon	a25_Kenya_ICIPE	96.407	13777	478	11	1	13760	1	13777	0.0	22683
a31_F_Lyon	a26_Kenya_ICIPE	96.458	13778	469	12	1	13760	1	13777	0.0	22722
a31_F_Lyon	a27_Kenya_ICIPE	96.407	13777	478	11	1	13760	1	13777	0.0	22683
a31_F_Lyon	a28_Kenya_Bondo	96.465	13778	468	12	1	13760	1	13777	0.0	22727
a31_F_Lyon	a29_F_Perigueux	99.993	13760	1	0	1	13760	1	13760	0.0	25405
a31_F_Lyon	a2_Ghana	96.400	13777	479	11	1	13760	1	13777	0.0	22677
a31_F_Lyon	a30_F_Champagne_au_mont_d_or	99.993	13760	1	0	1	13760	1	13760	0.0	25405
a31_F_Lyon	a31_F_Lyon	100.000	13760	0	0	1	13760	1	13760	0.0	25411
a31_F_Lyon	a32_F_Montpellier	99.993	13760	1	0	1	13760	1	13760	0.0	25405
a31_F_Lyon	a33_not_hermetia_F_Bayonne	81.526	12585	2051	202	1296	13760	1224	13654	0.0	10107
a31_F_Lyon	a34_not_hermetia_F_Bayonne	81.526	12585	2051	202	1296	13760	1224	13654	0.0	10107
a31_F_Lyon	a35_F_Lormont	99.985	13760	2	0	1	13760	1	13760	0.0	25399
a31_F_Lyon	a36_F_Lormont	99.993	13760	1	0	1	13760	1	13760	0.0	25405
a31_F_Lyon	a37_F_La_Force	99.993	13760	1	0	1	13760	1	13760	0.0	25405
a31_F_Lyon	a38_F_St_Georges_Les_Baiilargeaux	99.985	13760	2	0	1	13760	1	13760	0.0	25399
a31_F_Lyon	a39_F_Nogent_Sur_Marne	99.295	13760	97	0	1	13760	1	13760	0.0	24873
a31_F_Lyon	a3_Ghana	96.400	13777	479	11	1	13760	1	13777	0.0	22677
a31_F_Lyon	a40_F_Vincennes	99.295	13760	97	0	1	13760	1	13760	0.0	24873
a31_F_Lyon	a41_F_Paris	99.993	13760	1	0	1	13760	1	13760	0.0	25405
a31_F_Lyon	a43_F_La_Rochelle	99.985	13760	2	0	1	13760	1	13760	0.0	25399
a31_F_Lyon	a44_F_Poitiers	99.993	13760	1	0	1	13760	1	13760	0.0	25405
a31_F_Lyon	a45_F_Poitiers	99.985	13760	2	0	1	13760	1	13760	0.0	25399
a31_F_Lyon	a46_F_Poitiers	99.993	13760	1	0	1	13760	1	13760	0.0	25405
a31_F_Lyon	a47_F_Poitiers	99.993	13760	1	0	1	13760	1	13760	0.0	25405
a31_F_Lyon	a48_F_Colomiers	99.106	13760	122	1	1	13760	1	13759	0.0	24727
a31_F_Lyon	a49_F_Valloire_Sur_Cisse	99.993	13760	1	0	1	13760	1	13760	0.0	25405
a31_F_Lyon	a4_Taiwan	99.985	13760	2	0	1	13760	1	13760	0.0	25399
a31_F_Lyon	a50_F_Blois	99.993	13760	1	0	1	13760	1	13760	0.0	25405
a31_F_Lyon	a51_F_Blois	99.985	13760	2	0	1	13760	1	13760	0.0	25399
a31_F_Lyon	a52_F_Blois	99.281	13762	97	1	1	13760	1	13762	0.0	24864
a31_F_Lyon	a53_F_Blois	99.978	13760	3	0	1	13760	1	13760	0.0	25394
a31_F_Lyon	a54_F_St_Marcellin_En_Forez	99.993	13760	1	0	1	13760	1	13760	0.0	25405
a31_F_Lyon	a55_F_Lormont	99.985	13760	2	0	1	13760	1	13760	0.0	25399
a31_F_Lyon	a56_F_La_Rochelle	99.985	13760	2	0	1	13760	1	13760	0.0	25399
a31_F_Lyon	a57_F_Paris	99.978	13760	3	0	1	13760	1	13760	0.0	25394
a31_F_Lyon	a58_F_La_Rochelle	99.993	13760	1	0	1	13760	1	13760	0.0	25405
a31_F_Lyon	a59_F_Bayonne	81.526	12585	2051	202	1296	13760	1224	13654	0.0	10107
a31_F_Lyon	a7_Kenya_Bondo	96.458	13748	468	12	31	13760	1	13747	0.0	22672
a31_F_Lyon	a8_Taiwan	96.399	13747	478	11	31	13760	1	13747	0.0	22628
a31_F_Lyon	a9_Taiwan	96.399	13747	478	11	31	13760	1	13747	0.0	22628
a31_F_Lyon	ADF04_CF	96.400	13777	479	11	1	13760	1	13777	0.0	22677
a31_F_Lyon	AOM17_CF	96.393	13777	479	12	1	13760	1	13776	0.0	22672
a31_F_Lyon	Berkley_female	96.407	13777	478	11	1	13760	1	13777	0.0	22683
a31_F_Lyon	Berkley_male_	96.407	13777	478	11	1	13760	1	13777	0.0	22683
a31_F_Lyon	Mito_Uk_Cambridge	96.407	13777	478	11	1	13760	1	13777	0.0	22683
a31_F_Lyon	NC_035232_ref_China	96.407	13777	478	11	1	13760	1	13777	0.0	22683
a32_F_Montpellier	a10_F_Avignon	96.396	13846	481	12	31	13858	1	13846	0.0	22788
a32_F_Montpellier	a11_F_Angouleme	99.985	13760	0	1	31	13788	1	13760	0.0	25398
a32_F_Montpellier	a12_F_Angouleme	96.482	13900	471	12	1	13882	1	13900	0.0	22943
a32_F_Montpellier	a13_F_Trescleoux	100.000	13883	0	0	1	13883	1	13883	0.0	25638
a32_F_Montpellier	a14_F_Dieulefit	100.000	13846	0	0	1	13846	1	13846	0.0	25569
a32_F_Montpellier	a15_Mexique	97.820	13852	289	10	1	13845	1	13846	0.0	23894
a32_F_Montpellier	a16_Guyane	99.258	13884	102	1	1	13883	1	13884	0.0	25067
a32_F_Montpellier	a17_Guyane	99.258	13884	102	1	1	13883	1	13884	0.0	25067
a32_F_Montpellier	a18_Guyane	99.256	13846	102	1	1	13845	1	13846	0.0	24997
a32_F_Montpellier	a19_Ghana_2	96.395	13760	479	11	1	13743	1	13760	0.0	22646
a32_F_Montpellier	a1_Ghana	96.389	13846	482	12	1	13828	1	13846	0.0	22783
a32_F_Montpellier	a20_Ghana_2	96.395	13760	479	11	1	13743	1	13760	0.0	22646
a32_F_Montpellier	a21_Ghana_2	96.389	13846	482	12	1	13828	1	13846	0.0	22783
a32_F_Montpellier	a22_Taiwan	96.410	13900	481	12	1	13882	1	13900	0.0	22888
a32_F_Montpellier	a25_Kenya_ICIPE	96.410	13900	481	12	1	13882	1	13900	0.0	22888
a32_F_Montpellier	a26_Kenya_ICIPE	96.447	13847	472	13	1	13828	1	13846	0.0	22827
a32_F_Montpellier	a27_Kenya_ICIPE	96.410	13900	481	12	1	13882	1	13900	0.0	22888
a32_F_Montpellier	a28_Kenya_Bondo	96.454	13847	471	13	1	13828	1	13846	0.0	22833
a32_F_Montpellier	a29_F_Perigueux	100.000	13883	0	0	1	13883	1	13883	0.0	25638
a32_F_Montpellier	a2_Ghana	96.403	13900	482	12	1	13882	1	13900	0.0	22882
a32_F_Montpellier	a30_F_Champagne_au_mont_d_or	100.000	13760	0	0	1	13760	1	13760	0.0	25411
a32_F_Montpellier	a31_F_Lyon	99.993	13760	1	0	1	13760	1	13760	0.0	25405
a32_F_Montpellier	a32_F_Montpellier	100.000	13883	0	0	1	13883	1	13883	0.0	25638
a32_F_Montpellier	a33_not_hermetia_F_Bayonne	81.533	12709	2070	204	1296	13881	1224	13778	0.0	10211
a32_F_Montpellier	a34_not_hermetia_F_Bayonne	81.533	12709	2070	204	1296	13881	1224	13778	0.0	10211
a32_F_Montpellier	a35_F_Lormont	99.993	13883	1	0	1	13883	1	13883	0.0	25632
a32_F_Montpellier	a36_F_Lormont	100.000	13883	0	0	1	13883	1	13883	0.0	25638
a32_F_Montpellier	a37_F_La_Force	100.000	13883	0	0	1	13883	1	13883	0.0	25638
a32_F_Montpellier	a38_F_St_Georges_Les_Baiilargeaux	99.993	13883	1	0	1	13883	1	13883	0.0	25632
a32_F_Montpellier	a39_F_Nogent_Sur_Marne	99.309	13883	96	0	1	13883	1	13883	0.0	25106
a32_F_Montpellier	a3_Ghana	96.389	13846	482	12	1	13828	1	13846	0.0	22783
a32_F_Montpellier	a40_F_Vincennes	99.307	13846	96	0	1	13846	1	13846	0.0	25037
a32_F_Montpellier	a41_F_Paris	100.000	13883	0	0	1	13883	1	13883	0.0	25638
a32_F_Montpellier	a43_F_La_Rochelle	99.993	13846	1	0	1	13846	1	13846	0.0	25564
a32_F_Montpellier	a44_F_Poitiers	100.000	13883	0	0	1	13883	1	13883	0.0	25638
a32_F_Montpellier	a45_F_Poitiers	99.993	13883	1	0	1	13883	1	13883	0.0	25632
a32_F_Montpellier	a46_F_Poitiers	100.000	13883	0	0	1	13883	1	13883	0.0	25638
a32_F_Montpellier	a47_F_Poitiers	100.000	13883	0	0	1	13883	1	13883	0.0	25638
a32_F_Montpellier	a48_F_Colomiers	99.113	13761	121	1	1	13761	1	13760	0.0	24735
a32_F_Montpellier	a49_F_Valloire_Sur_Cisse	100.000	13883	0	0	1	13883	1	13883	0.0	25638
a32_F_Montpellier	a4_Taiwan	99.993	13883	1	0	1	13883	1	13883	0.0	25632
a32_F_Montpellier	a50_F_Blois	100.000	13883	0	0	1	13883	1	13883	0.0	25638
a32_F_Montpellier	a51_F_Blois	99.993	13760	1	0	1	13760	1	13760	0.0	25405
a32_F_Montpellier	a52_F_Blois	99.294	13885	96	1	1	13883	1	13885	0.0	25097
a32_F_Montpellier	a53_F_Blois	99.986	13883	2	0	1	13883	1	13883	0.0	25627
a32_F_Montpellier	a54_F_St_Marcellin_En_Forez	100.000	13760	0	0	1	13760	1	13760	0.0	25411
a32_F_Montpellier	a55_F_Lormont	99.993	13760	1	0	1	13760	1	13760	0.0	25405
a32_F_Montpellier	a56_F_La_Rochelle	99.993	13760	1	0	1	13760	1	13760	0.0	25405
a32_F_Montpellier	a57_F_Paris	99.985	13760	2	0	1	13760	1	13760	0.0	25399
a32_F_Montpellier	a58_F_La_Rochelle	100.000	13760	0	0	1	13760	1	13760	0.0	25411
a32_F_Montpellier	a59_F_Bayonne	81.533	12709	2070	204	1296	13881	1224	13778	0.0	10211
a32_F_Montpellier	a7_Kenya_Bondo	96.454	13847	471	13	31	13858	1	13846	0.0	22833
a32_F_Montpellier	a8_Taiwan	96.396	13846	481	12	31	13858	1	13846	0.0	22788
a32_F_Montpellier	a9_Taiwan	96.403	13760	478	11	31	13773	1	13760	0.0	22652
a32_F_Montpellier	ADF04_CF	96.403	13900	482	12	1	13882	1	13900	0.0	22882
a32_F_Montpellier	AOM17_CF	96.396	13900	482	13	1	13882	1	13899	0.0	22875
a32_F_Montpellier	Berkley_female	96.410	13900	481	12	1	13882	1	13900	0.0	22888
a32_F_Montpellier	Berkley_male_	96.410	13900	481	12	1	13882	1	13900	0.0	22888
a32_F_Montpellier	Mito_Uk_Cambridge	96.410	13900	481	12	1	13882	1	13900	0.0	22888
a32_F_Montpellier	NC_035232_ref_China	96.410	13900	481	12	1	13882	1	13900	0.0	22888
a33_not_hermetia_F_Bayonne	a10_F_Avignon	80.778	13807	2330	254	132	13755	181	13846	0.0	10495
a33_not_hermetia_F_Bayonne	a11_F_Angouleme	81.509	12617	2054	205	1224	13683	1266	13760	0.0	10117
a33_not_hermetia_F_Bayonne	a12_F_Angouleme	80.753	13831	2336	257	132	13778	211	13899	0.0	10493
a33_not_hermetia_F_Bayonne	a13_F_Trescleoux	81.534	12710	2068	205	1224	13778	1296	13881	0.0	10211
a33_not_hermetia_F_Bayonne	a14_F_Dieulefit	81.520	12673	2063	205	1224	13741	1296	13844	0.0	10170
a33_not_hermetia_F_Bayonne	a15_Mexique	80.654	13801	2329	265	130	13741	197	13845	0.0	10379
a33_not_hermetia_F_Bayonne	a16_Guyane	81.614	12711	2057	205	1224	13778	1296	13882	0.0	10268
a33_not_hermetia_F_Bayonne	a17_Guyane	81.614	12711	2057	205	1224	13778	1296	13882	0.0	10268
a33_not_hermetia_F_Bayonne	a18_Guyane	81.600	12674	2052	205	1224	13741	1296	13845	0.0	10227
a33_not_hermetia_F_Bayonne	a19_Ghana_2	80.750	13688	2315	250	132	13637	211	13760	0.0	10384
a33_not_hermetia_F_Bayonne	a1_Ghana	80.742	13776	2331	252	132	13725	211	13846	0.0	10445
a33_not_hermetia_F_Bayonne	a20_Ghana_2	80.750	13688	2315	250	132	13637	211	13760	0.0	10384
a33_not_hermetia_F_Bayonne	a21_Ghana_2	80.742	13776	2331	252	132	13725	211	13846	0.0	10445
a33_not_hermetia_F_Bayonne	a22_Taiwan	80.788	13830	2333	254	132	13778	211	13899	0.0	10521
a33_not_hermetia_F_Bayonne	a25_Kenya_ICIPE	80.788	13830	2333	254	132	13778	211	13899	0.0	10521
a33_not_hermetia_F_Bayonne	a26_Kenya_ICIPE	80.729	13777	2331	253	132	13725	211	13846	0.0	10434
a33_not_hermetia_F_Bayonne	a27_Kenya_ICIPE	80.788	13830	2333	254	132	13778	211	13899	0.0	10521
a33_not_hermetia_F_Bayonne	a28_Kenya_Bondo	80.736	13777	2330	253	132	13725	211	13846	0.0	10440
a33_not_hermetia_F_Bayonne	a29_F_Perigueux	81.534	12710	2068	205	1224	13778	1296	13881	0.0	10211
a33_not_hermetia_F_Bayonne	a2_Ghana	80.780	13829	2336	252	132	13778	211	13899	0.0	10515
a33_not_hermetia_F_Bayonne	a30_F_Champagne_au_mont_d_or	81.527	12586	2049	203	1224	13654	1296	13760	0.0	10107
a33_not_hermetia_F_Bayonne	a31_F_Lyon	81.527	12586	2049	203	1224	13654	1296	13760	0.0	10107
a33_not_hermetia_F_Bayonne	a32_F_Montpellier	81.534	12710	2068	205	1224	13778	1296	13881	0.0	10211
a33_not_hermetia_F_Bayonne	a33_not_hermetia_F_Bayonne	100.000	13780	0	0	1	13780	1	13780	0.0	25447
a33_not_hermetia_F_Bayonne	a34_not_hermetia_F_Bayonne	100.000	13780	0	0	1	13780	1	13780	0.0	25447
a33_not_hermetia_F_Bayonne	a35_F_Lormont	81.534	12710	2068	205	1224	13778	1296	13881	0.0	10211
a33_not_hermetia_F_Bayonne	a36_F_Lormont	81.534	12710	2068	205	1224	13778	1296	13881	0.0	10211
a33_not_hermetia_F_Bayonne	a37_F_La_Force	81.534	12710	2068	205	1224	13778	1296	13881	0.0	10211
a33_not_hermetia_F_Bayonne	a38_F_St_Georges_Les_Baiilargeaux	81.526	12710	2069	205	1224	13778	1296	13881	0.0	10205
a33_not_hermetia_F_Bayonne	a39_F_Nogent_Sur_Marne	81.544	12711	2065	208	1224	13778	1296	13881	0.0	10216
a33_not_hermetia_F_Bayonne	a3_Ghana	80.742	13776	2331	252	132	13725	211	13846	0.0	10445
a33_not_hermetia_F_Bayonne	a40_F_Vincennes	81.529	12674	2060	208	1224	13741	1296	13844	0.0	10176
a33_not_hermetia_F_Bayonne	a41_F_Paris	81.534	12710	2068	205	1224	13778	1296	13881	0.0	10211
a33_not_hermetia_F_Bayonne	a43_F_La_Rochelle	81.528	12673	2062	205	1224	13741	1296	13844	0.0	10176
a33_not_hermetia_F_Bayonne	a44_F_Poitiers	81.534	12710	2068	205	1224	13778	1296	13881	0.0	10211
a33_not_hermetia_F_Bayonne	a45_F_Poitiers	81.526	12710	2069	205	1224	13778	1296	13881	0.0	10205
a33_not_hermetia_F_Bayonne	a46_F_Poitiers	81.534	12710	2068	205	1224	13778	1296	13881	0.0	10211
a33_not_hermetia_F_Bayonne	a47_F_Poitiers	81.534	12710	2068	205	1224	13778	1296	13881	0.0	10211
a33_not_hermetia_F_Bayonne	a48_F_Colomiers	80.617	13708	2323	258	132	13654	201	13759	0.0	10286
a33_not_hermetia_F_Bayonne	a49_F_Valloire_Sur_Cisse	81.534	12710	2068	205	1224	13778	1296	13881	0.0	10211
a33_not_hermetia_F_Bayonne	a4_Taiwan	81.534	12710	2068	205	1224	13778	1296	13881	0.0	10211
a33_not_hermetia_F_Bayonne	a50_F_Blois	81.534	12710	2068	205	1224	13778	1296	13881	0.0	10211
a33_not_hermetia_F_Bayonne	a51_F_Blois	81.527	12586	2049	203	1224	13654	1296	13760	0.0	10107
a33_not_hermetia_F_Bayonne	a52_F_Blois	81.561	12712	2063	206	1224	13778	1296	13883	0.0	10229
a33_not_hermetia_F_Bayonne	a53_F_Blois	81.526	12710	2069	205	1224	13778	1296	13881	0.0	10205
a33_not_hermetia_F_Bayonne	a54_F_St_Marcellin_En_Forez	81.527	12586	2049	203	1224	13654	1296	13760	0.0	10107
a33_not_hermetia_F_Bayonne	a55_F_Lormont	81.527	12586	2049	203	1224	13654	1296	13760	0.0	10107
a33_not_hermetia_F_Bayonne	a56_F_La_Rochelle	81.535	12586	2048	203	1224	13654	1296	13760	0.0	10113
a33_not_hermetia_F_Bayonne	a57_F_Paris	81.543	12586	2047	203	1224	13654	1296	13760	0.0	10118
a33_not_hermetia_F_Bayonne	a58_F_La_Rochelle	81.527	12586	2049	203	1224	13654	1296	13760	0.0	10107
a33_not_hermetia_F_Bayonne	a59_F_Bayonne	100.000	13780	0	0	1	13780	1	13780	0.0	25447
a33_not_hermetia_F_Bayonne	a7_Kenya_Bondo	80.763	13807	2332	253	132	13755	181	13846	0.0	10484
a33_not_hermetia_F_Bayonne	a8_Taiwan	80.778	13807	2330	254	132	13755	181	13846	0.0	10495
a33_not_hermetia_F_Bayonne	a9_Taiwan	80.758	13720	2317	253	132	13668	181	13760	0.0	10412
a33_not_hermetia_F_Bayonne	ADF04_CF	80.780	13829	2336	252	132	13778	211	13899	0.0	10515
a33_not_hermetia_F_Bayonne	AOM17_CF	80.772	13829	2336	253	132	13778	211	13898	0.0	10508
a33_not_hermetia_F_Bayonne	Berkley_female	80.788	13830	2333	254	132	13778	211	13899	0.0	10521
a33_not_hermetia_F_Bayonne	Berkley_male_	80.788	13830	2333	254	132	13778	211	13899	0.0	10521
a33_not_hermetia_F_Bayonne	Mito_Uk_Cambridge	80.788	13830	2333	254	132	13778	211	13899	0.0	10521
a33_not_hermetia_F_Bayonne	NC_035232_ref_China	80.788	13830	2333	254	132	13778	211	13899	0.0	10521
a34_not_hermetia_F_Bayonne	a10_F_Avignon	80.778	13807	2330	254	132	13755	181	13846	0.0	10495
a34_not_hermetia_F_Bayonne	a11_F_Angouleme	81.509	12617	2054	205	1224	13683	1266	13760	0.0	10117
a34_not_hermetia_F_Bayonne	a12_F_Angouleme	80.753	13831	2336	257	132	13778	211	13899	0.0	10493
a34_not_hermetia_F_Bayonne	a13_F_Trescleoux	81.534	12710	2068	205	1224	13778	1296	13881	0.0	10211
a34_not_hermetia_F_Bayonne	a14_F_Dieulefit	81.520	12673	2063	205	1224	13741	1296	13844	0.0	10170
a34_not_hermetia_F_Bayonne	a15_Mexique	80.654	13801	2329	265	130	13741	197	13845	0.0	10379
a34_not_hermetia_F_Bayonne	a16_Guyane	81.614	12711	2057	205	1224	13778	1296	13882	0.0	10268
a34_not_hermetia_F_Bayonne	a17_Guyane	81.614	12711	2057	205	1224	13778	1296	13882	0.0	10268
a34_not_hermetia_F_Bayonne	a18_Guyane	81.600	12674	2052	205	1224	13741	1296	13845	0.0	10227
a34_not_hermetia_F_Bayonne	a19_Ghana_2	80.750	13688	2315	250	132	13637	211	13760	0.0	10384
a34_not_hermetia_F_Bayonne	a1_Ghana	80.742	13776	2331	252	132	13725	211	13846	0.0	10445
a34_not_hermetia_F_Bayonne	a20_Ghana_2	80.750	13688	2315	250	132	13637	211	13760	0.0	10384
a34_not_hermetia_F_Bayonne	a21_Ghana_2	80.742	13776	2331	252	132	13725	211	13846	0.0	10445
a34_not_hermetia_F_Bayonne	a22_Taiwan	80.788	13830	2333	254	132	13778	211	13899	0.0	10521
a34_not_hermetia_F_Bayonne	a25_Kenya_ICIPE	80.788	13830	2333	254	132	13778	211	13899	0.0	10521
a34_not_hermetia_F_Bayonne	a26_Kenya_ICIPE	80.729	13777	2331	253	132	13725	211	13846	0.0	10434
a34_not_hermetia_F_Bayonne	a27_Kenya_ICIPE	80.788	13830	2333	254	132	13778	211	13899	0.0	10521
a34_not_hermetia_F_Bayonne	a28_Kenya_Bondo	80.736	13777	2330	253	132	13725	211	13846	0.0	10440
a34_not_hermetia_F_Bayonne	a29_F_Perigueux	81.534	12710	2068	205	1224	13778	1296	13881	0.0	10211
a34_not_hermetia_F_Bayonne	a2_Ghana	80.780	13829	2336	252	132	13778	211	13899	0.0	10515
a34_not_hermetia_F_Bayonne	a30_F_Champagne_au_mont_d_or	81.527	12586	2049	203	1224	13654	1296	13760	0.0	10107
a34_not_hermetia_F_Bayonne	a31_F_Lyon	81.527	12586	2049	203	1224	13654	1296	13760	0.0	10107
a34_not_hermetia_F_Bayonne	a32_F_Montpellier	81.534	12710	2068	205	1224	13778	1296	13881	0.0	10211
a34_not_hermetia_F_Bayonne	a33_not_hermetia_F_Bayonne	100.000	13780	0	0	1	13780	1	13780	0.0	25447
a34_not_hermetia_F_Bayonne	a34_not_hermetia_F_Bayonne	100.000	13780	0	0	1	13780	1	13780	0.0	25447
a34_not_hermetia_F_Bayonne	a35_F_Lormont	81.534	12710	2068	205	1224	13778	1296	13881	0.0	10211
a34_not_hermetia_F_Bayonne	a36_F_Lormont	81.534	12710	2068	205	1224	13778	1296	13881	0.0	10211
a34_not_hermetia_F_Bayonne	a37_F_La_Force	81.534	12710	2068	205	1224	13778	1296	13881	0.0	10211
a34_not_hermetia_F_Bayonne	a38_F_St_Georges_Les_Baiilargeaux	81.526	12710	2069	205	1224	13778	1296	13881	0.0	10205
a34_not_hermetia_F_Bayonne	a39_F_Nogent_Sur_Marne	81.544	12711	2065	208	1224	13778	1296	13881	0.0	10216
a34_not_hermetia_F_Bayonne	a3_Ghana	80.742	13776	2331	252	132	13725	211	13846	0.0	10445
a34_not_hermetia_F_Bayonne	a40_F_Vincennes	81.529	12674	2060	208	1224	13741	1296	13844	0.0	10176
a34_not_hermetia_F_Bayonne	a41_F_Paris	81.534	12710	2068	205	1224	13778	1296	13881	0.0	10211
a34_not_hermetia_F_Bayonne	a43_F_La_Rochelle	81.528	12673	2062	205	1224	13741	1296	13844	0.0	10176
a34_not_hermetia_F_Bayonne	a44_F_Poitiers	81.534	12710	2068	205	1224	13778	1296	13881	0.0	10211
a34_not_hermetia_F_Bayonne	a45_F_Poitiers	81.526	12710	2069	205	1224	13778	1296	13881	0.0	10205
a34_not_hermetia_F_Bayonne	a46_F_Poitiers	81.534	12710	2068	205	1224	13778	1296	13881	0.0	10211
a34_not_hermetia_F_Bayonne	a47_F_Poitiers	81.534	12710	2068	205	1224	13778	1296	13881	0.0	10211
a34_not_hermetia_F_Bayonne	a48_F_Colomiers	80.617	13708	2323	258	132	13654	201	13759	0.0	10286
a34_not_hermetia_F_Bayonne	a49_F_Valloire_Sur_Cisse	81.534	12710	2068	205	1224	13778	1296	13881	0.0	10211
a34_not_hermetia_F_Bayonne	a4_Taiwan	81.534	12710	2068	205	1224	13778	1296	13881	0.0	10211
a34_not_hermetia_F_Bayonne	a50_F_Blois	81.534	12710	2068	205	1224	13778	1296	13881	0.0	10211
a34_not_hermetia_F_Bayonne	a51_F_Blois	81.527	12586	2049	203	1224	13654	1296	13760	0.0	10107
a34_not_hermetia_F_Bayonne	a52_F_Blois	81.561	12712	2063	206	1224	13778	1296	13883	0.0	10229
a34_not_hermetia_F_Bayonne	a53_F_Blois	81.526	12710	2069	205	1224	13778	1296	13881	0.0	10205
a34_not_hermetia_F_Bayonne	a54_F_St_Marcellin_En_Forez	81.527	12586	2049	203	1224	13654	1296	13760	0.0	10107
a34_not_hermetia_F_Bayonne	a55_F_Lormont	81.527	12586	2049	203	1224	13654	1296	13760	0.0	10107
a34_not_hermetia_F_Bayonne	a56_F_La_Rochelle	81.535	12586	2048	203	1224	13654	1296	13760	0.0	10113
a34_not_hermetia_F_Bayonne	a57_F_Paris	81.543	12586	2047	203	1224	13654	1296	13760	0.0	10118
a34_not_hermetia_F_Bayonne	a58_F_La_Rochelle	81.527	12586	2049	203	1224	13654	1296	13760	0.0	10107
a34_not_hermetia_F_Bayonne	a59_F_Bayonne	100.000	13780	0	0	1	13780	1	13780	0.0	25447
a34_not_hermetia_F_Bayonne	a7_Kenya_Bondo	80.763	13807	2332	253	132	13755	181	13846	0.0	10484
a34_not_hermetia_F_Bayonne	a8_Taiwan	80.778	13807	2330	254	132	13755	181	13846	0.0	10495
a34_not_hermetia_F_Bayonne	a9_Taiwan	80.758	13720	2317	253	132	13668	181	13760	0.0	10412
a34_not_hermetia_F_Bayonne	ADF04_CF	80.780	13829	2336	252	132	13778	211	13899	0.0	10515
a34_not_hermetia_F_Bayonne	AOM17_CF	80.772	13829	2336	253	132	13778	211	13898	0.0	10508
a34_not_hermetia_F_Bayonne	Berkley_female	80.788	13830	2333	254	132	13778	211	13899	0.0	10521
a34_not_hermetia_F_Bayonne	Berkley_male_	80.788	13830	2333	254	132	13778	211	13899	0.0	10521
a34_not_hermetia_F_Bayonne	Mito_Uk_Cambridge	80.788	13830	2333	254	132	13778	211	13899	0.0	10521
a34_not_hermetia_F_Bayonne	NC_035232_ref_China	80.788	13830	2333	254	132	13778	211	13899	0.0	10521
a35_F_Lormont	a10_F_Avignon	96.389	13846	482	12	31	13858	1	13846	0.0	22783
a35_F_Lormont	a11_F_Angouleme	99.978	13760	1	1	31	13788	1	13760	0.0	25392
a35_F_Lormont	a12_F_Angouleme	96.475	13900	472	12	1	13882	1	13900	0.0	22938
a35_F_Lormont	a13_F_Trescleoux	99.993	13883	1	0	1	13883	1	13883	0.0	25632
a35_F_Lormont	a14_F_Dieulefit	99.993	13846	1	0	1	13846	1	13846	0.0	25564
a35_F_Lormont	a15_Mexique	97.813	13852	290	10	1	13845	1	13846	0.0	23889
a35_F_Lormont	a16_Guyane	99.251	13884	103	1	1	13883	1	13884	0.0	25062
a35_F_Lormont	a17_Guyane	99.251	13884	103	1	1	13883	1	13884	0.0	25062
a35_F_Lormont	a18_Guyane	99.249	13846	103	1	1	13845	1	13846	0.0	24991
a35_F_Lormont	a19_Ghana_2	96.388	13760	480	11	1	13743	1	13760	0.0	22641
a35_F_Lormont	a1_Ghana	96.382	13846	483	12	1	13828	1	13846	0.0	22777
a35_F_Lormont	a20_Ghana_2	96.388	13760	480	11	1	13743	1	13760	0.0	22641
a35_F_Lormont	a21_Ghana_2	96.382	13846	483	12	1	13828	1	13846	0.0	22777
a35_F_Lormont	a22_Taiwan	96.403	13900	482	12	1	13882	1	13900	0.0	22882
a35_F_Lormont	a25_Kenya_ICIPE	96.403	13900	482	12	1	13882	1	13900	0.0	22882
a35_F_Lormont	a26_Kenya_ICIPE	96.440	13847	473	13	1	13828	1	13846	0.0	22822
a35_F_Lormont	a27_Kenya_ICIPE	96.403	13900	482	12	1	13882	1	13900	0.0	22882
a35_F_Lormont	a28_Kenya_Bondo	96.447	13847	472	13	1	13828	1	13846	0.0	22827
a35_F_Lormont	a29_F_Perigueux	99.993	13883	1	0	1	13883	1	13883	0.0	25632
a35_F_Lormont	a2_Ghana	96.396	13900	483	12	1	13882	1	13900	0.0	22877
a35_F_Lormont	a30_F_Champagne_au_mont_d_or	99.993	13760	1	0	1	13760	1	13760	0.0	25405
a35_F_Lormont	a31_F_Lyon	99.985	13760	2	0	1	13760	1	13760	0.0	25399
a35_F_Lormont	a32_F_Montpellier	99.993	13883	1	0	1	13883	1	13883	0.0	25632
a35_F_Lormont	a33_not_hermetia_F_Bayonne	81.533	12709	2070	204	1296	13881	1224	13778	0.0	10211
a35_F_Lormont	a34_not_hermetia_F_Bayonne	81.533	12709	2070	204	1296	13881	1224	13778	0.0	10211
a35_F_Lormont	a35_F_Lormont	100.000	13883	0	0	1	13883	1	13883	0.0	25638
a35_F_Lormont	a36_F_Lormont	99.993	13883	1	0	1	13883	1	13883	0.0	25632
a35_F_Lormont	a37_F_La_Force	99.993	13883	1	0	1	13883	1	13883	0.0	25632
a35_F_Lormont	a38_F_St_Georges_Les_Baiilargeaux	99.986	13883	2	0	1	13883	1	13883	0.0	25627
a35_F_Lormont	a39_F_Nogent_Sur_Marne	99.301	13883	97	0	1	13883	1	13883	0.0	25100
a35_F_Lormont	a3_Ghana	96.382	13846	483	12	1	13828	1	13846	0.0	22777
a35_F_Lormont	a40_F_Vincennes	99.299	13846	97	0	1	13846	1	13846	0.0	25032
a35_F_Lormont	a41_F_Paris	99.993	13883	1	0	1	13883	1	13883	0.0	25632
a35_F_Lormont	a43_F_La_Rochelle	99.986	13846	2	0	1	13846	1	13846	0.0	25558
a35_F_Lormont	a44_F_Poitiers	99.993	13883	1	0	1	13883	1	13883	0.0	25632
a35_F_Lormont	a45_F_Poitiers	99.986	13883	2	0	1	13883	1	13883	0.0	25627
a35_F_Lormont	a46_F_Poitiers	99.993	13883	1	0	1	13883	1	13883	0.0	25632
a35_F_Lormont	a47_F_Poitiers	99.993	13883	1	0	1	13883	1	13883	0.0	25632
a35_F_Lormont	a48_F_Colomiers	99.106	13761	122	1	1	13761	1	13760	0.0	24729
a35_F_Lormont	a49_F_Valloire_Sur_Cisse	99.993	13883	1	0	1	13883	1	13883	0.0	25632
a35_F_Lormont	a4_Taiwan	99.986	13883	2	0	1	13883	1	13883	0.0	25627
a35_F_Lormont	a50_F_Blois	99.993	13883	1	0	1	13883	1	13883	0.0	25632
a35_F_Lormont	a51_F_Blois	100.000	13760	0	0	1	13760	1	13760	0.0	25411
a35_F_Lormont	a52_F_Blois	99.287	13885	97	1	1	13883	1	13885	0.0	25091
a35_F_Lormont	a53_F_Blois	99.978	13883	3	0	1	13883	1	13883	0.0	25621
a35_F_Lormont	a54_F_St_Marcellin_En_Forez	99.993	13760	1	0	1	13760	1	13760	0.0	25405
a35_F_Lormont	a55_F_Lormont	100.000	13760	0	0	1	13760	1	13760	0.0	25411
a35_F_Lormont	a56_F_La_Rochelle	99.985	13760	2	0	1	13760	1	13760	0.0	25399
a35_F_Lormont	a57_F_Paris	99.978	13760	3	0	1	13760	1	13760	0.0	25394
a35_F_Lormont	a58_F_La_Rochelle	99.993	13760	1	0	1	13760	1	13760	0.0	25405
a35_F_Lormont	a59_F_Bayonne	81.533	12709	2070	204	1296	13881	1224	13778	0.0	10211
a35_F_Lormont	a7_Kenya_Bondo	96.447	13847	472	13	31	13858	1	13846	0.0	22827
a35_F_Lormont	a8_Taiwan	96.389	13846	482	12	31	13858	1	13846	0.0	22783
a35_F_Lormont	a9_Taiwan	96.395	13760	479	11	31	13773	1	13760	0.0	22646
a35_F_Lormont	ADF04_CF	96.396	13900	483	12	1	13882	1	13900	0.0	22877
a35_F_Lormont	AOM17_CF	96.388	13900	483	13	1	13882	1	13899	0.0	22870
a35_F_Lormont	Berkley_female	96.403	13900	482	12	1	13882	1	13900	0.0	22882
a35_F_Lormont	Berkley_male_	96.403	13900	482	12	1	13882	1	13900	0.0	22882
a35_F_Lormont	Mito_Uk_Cambridge	96.403	13900	482	12	1	13882	1	13900	0.0	22882
a35_F_Lormont	NC_035232_ref_China	96.403	13900	482	12	1	13882	1	13900	0.0	22882
a36_F_Lormont	a10_F_Avignon	96.396	13846	481	12	31	13858	1	13846	0.0	22788
a36_F_Lormont	a11_F_Angouleme	99.985	13760	0	1	31	13788	1	13760	0.0	25398
a36_F_Lormont	a12_F_Angouleme	96.482	13900	471	12	1	13882	1	13900	0.0	22943
a36_F_Lormont	a13_F_Trescleoux	100.000	13883	0	0	1	13883	1	13883	0.0	25638
a36_F_Lormont	a14_F_Dieulefit	100.000	13846	0	0	1	13846	1	13846	0.0	25569
a36_F_Lormont	a15_Mexique	97.820	13852	289	10	1	13845	1	13846	0.0	23894
a36_F_Lormont	a16_Guyane	99.258	13884	102	1	1	13883	1	13884	0.0	25067
a36_F_Lormont	a17_Guyane	99.258	13884	102	1	1	13883	1	13884	0.0	25067
a36_F_Lormont	a18_Guyane	99.256	13846	102	1	1	13845	1	13846	0.0	24997
a36_F_Lormont	a19_Ghana_2	96.395	13760	479	11	1	13743	1	13760	0.0	22646
a36_F_Lormont	a1_Ghana	96.389	13846	482	12	1	13828	1	13846	0.0	22783
a36_F_Lormont	a20_Ghana_2	96.395	13760	479	11	1	13743	1	13760	0.0	22646
a36_F_Lormont	a21_Ghana_2	96.389	13846	482	12	1	13828	1	13846	0.0	22783
a36_F_Lormont	a22_Taiwan	96.410	13900	481	12	1	13882	1	13900	0.0	22888
a36_F_Lormont	a25_Kenya_ICIPE	96.410	13900	481	12	1	13882	1	13900	0.0	22888
a36_F_Lormont	a26_Kenya_ICIPE	96.447	13847	472	13	1	13828	1	13846	0.0	22827
a36_F_Lormont	a27_Kenya_ICIPE	96.410	13900	481	12	1	13882	1	13900	0.0	22888
a36_F_Lormont	a28_Kenya_Bondo	96.454	13847	471	13	1	13828	1	13846	0.0	22833
a36_F_Lormont	a29_F_Perigueux	100.000	13883	0	0	1	13883	1	13883	0.0	25638
a36_F_Lormont	a2_Ghana	96.403	13900	482	12	1	13882	1	13900	0.0	22882
a36_F_Lormont	a30_F_Champagne_au_mont_d_or	100.000	13760	0	0	1	13760	1	13760	0.0	25411
a36_F_Lormont	a31_F_Lyon	99.993	13760	1	0	1	13760	1	13760	0.0	25405
a36_F_Lormont	a32_F_Montpellier	100.000	13883	0	0	1	13883	1	13883	0.0	25638
a36_F_Lormont	a33_not_hermetia_F_Bayonne	81.533	12709	2070	204	1296	13881	1224	13778	0.0	10211
a36_F_Lormont	a34_not_hermetia_F_Bayonne	81.533	12709	2070	204	1296	13881	1224	13778	0.0	10211
a36_F_Lormont	a35_F_Lormont	99.993	13883	1	0	1	13883	1	13883	0.0	25632
a36_F_Lormont	a36_F_Lormont	100.000	13883	0	0	1	13883	1	13883	0.0	25638
a36_F_Lormont	a37_F_La_Force	100.000	13883	0	0	1	13883	1	13883	0.0	25638
a36_F_Lormont	a38_F_St_Georges_Les_Baiilargeaux	99.993	13883	1	0	1	13883	1	13883	0.0	25632
a36_F_Lormont	a39_F_Nogent_Sur_Marne	99.309	13883	96	0	1	13883	1	13883	0.0	25106
a36_F_Lormont	a3_Ghana	96.389	13846	482	12	1	13828	1	13846	0.0	22783
a36_F_Lormont	a40_F_Vincennes	99.307	13846	96	0	1	13846	1	13846	0.0	25037
a36_F_Lormont	a41_F_Paris	100.000	13883	0	0	1	13883	1	13883	0.0	25638
a36_F_Lormont	a43_F_La_Rochelle	99.993	13846	1	0	1	13846	1	13846	0.0	25564
a36_F_Lormont	a44_F_Poitiers	100.000	13883	0	0	1	13883	1	13883	0.0	25638
a36_F_Lormont	a45_F_Poitiers	99.993	13883	1	0	1	13883	1	13883	0.0	25632
a36_F_Lormont	a46_F_Poitiers	100.000	13883	0	0	1	13883	1	13883	0.0	25638
a36_F_Lormont	a47_F_Poitiers	100.000	13883	0	0	1	13883	1	13883	0.0	25638
a36_F_Lormont	a48_F_Colomiers	99.113	13761	121	1	1	13761	1	13760	0.0	24735
a36_F_Lormont	a49_F_Valloire_Sur_Cisse	100.000	13883	0	0	1	13883	1	13883	0.0	25638
a36_F_Lormont	a4_Taiwan	99.993	13883	1	0	1	13883	1	13883	0.0	25632
a36_F_Lormont	a50_F_Blois	100.000	13883	0	0	1	13883	1	13883	0.0	25638
a36_F_Lormont	a51_F_Blois	99.993	13760	1	0	1	13760	1	13760	0.0	25405
a36_F_Lormont	a52_F_Blois	99.294	13885	96	1	1	13883	1	13885	0.0	25097
a36_F_Lormont	a53_F_Blois	99.986	13883	2	0	1	13883	1	13883	0.0	25627
a36_F_Lormont	a54_F_St_Marcellin_En_Forez	100.000	13760	0	0	1	13760	1	13760	0.0	25411
a36_F_Lormont	a55_F_Lormont	99.993	13760	1	0	1	13760	1	13760	0.0	25405
a36_F_Lormont	a56_F_La_Rochelle	99.993	13760	1	0	1	13760	1	13760	0.0	25405
a36_F_Lormont	a57_F_Paris	99.985	13760	2	0	1	13760	1	13760	0.0	25399
a36_F_Lormont	a58_F_La_Rochelle	100.000	13760	0	0	1	13760	1	13760	0.0	25411
a36_F_Lormont	a59_F_Bayonne	81.533	12709	2070	204	1296	13881	1224	13778	0.0	10211
a36_F_Lormont	a7_Kenya_Bondo	96.454	13847	471	13	31	13858	1	13846	0.0	22833
a36_F_Lormont	a8_Taiwan	96.396	13846	481	12	31	13858	1	13846	0.0	22788
a36_F_Lormont	a9_Taiwan	96.403	13760	478	11	31	13773	1	13760	0.0	22652
a36_F_Lormont	ADF04_CF	96.403	13900	482	12	1	13882	1	13900	0.0	22882
a36_F_Lormont	AOM17_CF	96.396	13900	482	13	1	13882	1	13899	0.0	22875
a36_F_Lormont	Berkley_female	96.410	13900	481	12	1	13882	1	13900	0.0	22888
a36_F_Lormont	Berkley_male_	96.410	13900	481	12	1	13882	1	13900	0.0	22888
a36_F_Lormont	Mito_Uk_Cambridge	96.410	13900	481	12	1	13882	1	13900	0.0	22888
a36_F_Lormont	NC_035232_ref_China	96.410	13900	481	12	1	13882	1	13900	0.0	22888
a37_F_La_Force	a10_F_Avignon	96.396	13846	481	12	31	13858	1	13846	0.0	22788
a37_F_La_Force	a11_F_Angouleme	99.985	13760	0	1	31	13788	1	13760	0.0	25398
a37_F_La_Force	a12_F_Angouleme	96.482	13900	471	12	1	13882	1	13900	0.0	22943
a37_F_La_Force	a13_F_Trescleoux	100.000	13883	0	0	1	13883	1	13883	0.0	25638
a37_F_La_Force	a14_F_Dieulefit	100.000	13846	0	0	1	13846	1	13846	0.0	25569
a37_F_La_Force	a15_Mexique	97.820	13852	289	10	1	13845	1	13846	0.0	23894
a37_F_La_Force	a16_Guyane	99.258	13884	102	1	1	13883	1	13884	0.0	25067
a37_F_La_Force	a17_Guyane	99.258	13884	102	1	1	13883	1	13884	0.0	25067
a37_F_La_Force	a18_Guyane	99.256	13846	102	1	1	13845	1	13846	0.0	24997
a37_F_La_Force	a19_Ghana_2	96.395	13760	479	11	1	13743	1	13760	0.0	22646
a37_F_La_Force	a1_Ghana	96.389	13846	482	12	1	13828	1	13846	0.0	22783
a37_F_La_Force	a20_Ghana_2	96.395	13760	479	11	1	13743	1	13760	0.0	22646
a37_F_La_Force	a21_Ghana_2	96.389	13846	482	12	1	13828	1	13846	0.0	22783
a37_F_La_Force	a22_Taiwan	96.410	13900	481	12	1	13882	1	13900	0.0	22888
a37_F_La_Force	a25_Kenya_ICIPE	96.410	13900	481	12	1	13882	1	13900	0.0	22888
a37_F_La_Force	a26_Kenya_ICIPE	96.447	13847	472	13	1	13828	1	13846	0.0	22827
a37_F_La_Force	a27_Kenya_ICIPE	96.410	13900	481	12	1	13882	1	13900	0.0	22888
a37_F_La_Force	a28_Kenya_Bondo	96.454	13847	471	13	1	13828	1	13846	0.0	22833
a37_F_La_Force	a29_F_Perigueux	100.000	13883	0	0	1	13883	1	13883	0.0	25638
a37_F_La_Force	a2_Ghana	96.403	13900	482	12	1	13882	1	13900	0.0	22882
a37_F_La_Force	a30_F_Champagne_au_mont_d_or	100.000	13760	0	0	1	13760	1	13760	0.0	25411
a37_F_La_Force	a31_F_Lyon	99.993	13760	1	0	1	13760	1	13760	0.0	25405
a37_F_La_Force	a32_F_Montpellier	100.000	13883	0	0	1	13883	1	13883	0.0	25638
a37_F_La_Force	a33_not_hermetia_F_Bayonne	81.533	12709	2070	204	1296	13881	1224	13778	0.0	10211
a37_F_La_Force	a34_not_hermetia_F_Bayonne	81.533	12709	2070	204	1296	13881	1224	13778	0.0	10211
a37_F_La_Force	a35_F_Lormont	99.993	13883	1	0	1	13883	1	13883	0.0	25632
a37_F_La_Force	a36_F_Lormont	100.000	13883	0	0	1	13883	1	13883	0.0	25638
a37_F_La_Force	a37_F_La_Force	100.000	13883	0	0	1	13883	1	13883	0.0	25638
a37_F_La_Force	a38_F_St_Georges_Les_Baiilargeaux	99.993	13883	1	0	1	13883	1	13883	0.0	25632
a37_F_La_Force	a39_F_Nogent_Sur_Marne	99.309	13883	96	0	1	13883	1	13883	0.0	25106
a37_F_La_Force	a3_Ghana	96.389	13846	482	12	1	13828	1	13846	0.0	22783
a37_F_La_Force	a40_F_Vincennes	99.307	13846	96	0	1	13846	1	13846	0.0	25037
a37_F_La_Force	a41_F_Paris	100.000	13883	0	0	1	13883	1	13883	0.0	25638
a37_F_La_Force	a43_F_La_Rochelle	99.993	13846	1	0	1	13846	1	13846	0.0	25564
a37_F_La_Force	a44_F_Poitiers	100.000	13883	0	0	1	13883	1	13883	0.0	25638
a37_F_La_Force	a45_F_Poitiers	99.993	13883	1	0	1	13883	1	13883	0.0	25632
a37_F_La_Force	a46_F_Poitiers	100.000	13883	0	0	1	13883	1	13883	0.0	25638
a37_F_La_Force	a47_F_Poitiers	100.000	13883	0	0	1	13883	1	13883	0.0	25638
a37_F_La_Force	a48_F_Colomiers	99.113	13761	121	1	1	13761	1	13760	0.0	24735
a37_F_La_Force	a49_F_Valloire_Sur_Cisse	100.000	13883	0	0	1	13883	1	13883	0.0	25638
a37_F_La_Force	a4_Taiwan	99.993	13883	1	0	1	13883	1	13883	0.0	25632
a37_F_La_Force	a50_F_Blois	100.000	13883	0	0	1	13883	1	13883	0.0	25638
a37_F_La_Force	a51_F_Blois	99.993	13760	1	0	1	13760	1	13760	0.0	25405
a37_F_La_Force	a52_F_Blois	99.294	13885	96	1	1	13883	1	13885	0.0	25097
a37_F_La_Force	a53_F_Blois	99.986	13883	2	0	1	13883	1	13883	0.0	25627
a37_F_La_Force	a54_F_St_Marcellin_En_Forez	100.000	13760	0	0	1	13760	1	13760	0.0	25411
a37_F_La_Force	a55_F_Lormont	99.993	13760	1	0	1	13760	1	13760	0.0	25405
a37_F_La_Force	a56_F_La_Rochelle	99.993	13760	1	0	1	13760	1	13760	0.0	25405
a37_F_La_Force	a57_F_Paris	99.985	13760	2	0	1	13760	1	13760	0.0	25399
a37_F_La_Force	a58_F_La_Rochelle	100.000	13760	0	0	1	13760	1	13760	0.0	25411
a37_F_La_Force	a59_F_Bayonne	81.533	12709	2070	204	1296	13881	1224	13778	0.0	10211
a37_F_La_Force	a7_Kenya_Bondo	96.454	13847	471	13	31	13858	1	13846	0.0	22833
a37_F_La_Force	a8_Taiwan	96.396	13846	481	12	31	13858	1	13846	0.0	22788
a37_F_La_Force	a9_Taiwan	96.403	13760	478	11	31	13773	1	13760	0.0	22652
a37_F_La_Force	ADF04_CF	96.403	13900	482	12	1	13882	1	13900	0.0	22882
a37_F_La_Force	AOM17_CF	96.396	13900	482	13	1	13882	1	13899	0.0	22875
a37_F_La_Force	Berkley_female	96.410	13900	481	12	1	13882	1	13900	0.0	22888
a37_F_La_Force	Berkley_male_	96.410	13900	481	12	1	13882	1	13900	0.0	22888
a37_F_La_Force	Mito_Uk_Cambridge	96.410	13900	481	12	1	13882	1	13900	0.0	22888
a37_F_La_Force	NC_035232_ref_China	96.410	13900	481	12	1	13882	1	13900	0.0	22888
a38_F_St_Georges_Les_Baiilargeaux	a10_F_Avignon	96.389	13846	482	12	31	13858	1	13846	0.0	22783
a38_F_St_Georges_Les_Baiilargeaux	a11_F_Angouleme	99.978	13760	1	1	31	13788	1	13760	0.0	25392
a38_F_St_Georges_Les_Baiilargeaux	a12_F_Angouleme	96.475	13900	472	12	1	13882	1	13900	0.0	22938
a38_F_St_Georges_Les_Baiilargeaux	a13_F_Trescleoux	99.993	13883	1	0	1	13883	1	13883	0.0	25632
a38_F_St_Georges_Les_Baiilargeaux	a14_F_Dieulefit	99.993	13846	1	0	1	13846	1	13846	0.0	25564
a38_F_St_Georges_Les_Baiilargeaux	a15_Mexique	97.813	13852	290	10	1	13845	1	13846	0.0	23889
a38_F_St_Georges_Les_Baiilargeaux	a16_Guyane	99.251	13884	103	1	1	13883	1	13884	0.0	25062
a38_F_St_Georges_Les_Baiilargeaux	a17_Guyane	99.251	13884	103	1	1	13883	1	13884	0.0	25062
a38_F_St_Georges_Les_Baiilargeaux	a18_Guyane	99.249	13846	103	1	1	13845	1	13846	0.0	24991
a38_F_St_Georges_Les_Baiilargeaux	a19_Ghana_2	96.388	13760	480	11	1	13743	1	13760	0.0	22641
a38_F_St_Georges_Les_Baiilargeaux	a1_Ghana	96.382	13846	483	12	1	13828	1	13846	0.0	22777
a38_F_St_Georges_Les_Baiilargeaux	a20_Ghana_2	96.388	13760	480	11	1	13743	1	13760	0.0	22641
a38_F_St_Georges_Les_Baiilargeaux	a21_Ghana_2	96.382	13846	483	12	1	13828	1	13846	0.0	22777
a38_F_St_Georges_Les_Baiilargeaux	a22_Taiwan	96.403	13900	482	12	1	13882	1	13900	0.0	22882
a38_F_St_Georges_Les_Baiilargeaux	a25_Kenya_ICIPE	96.403	13900	482	12	1	13882	1	13900	0.0	22882
a38_F_St_Georges_Les_Baiilargeaux	a26_Kenya_ICIPE	96.440	13847	473	13	1	13828	1	13846	0.0	22822
a38_F_St_Georges_Les_Baiilargeaux	a27_Kenya_ICIPE	96.403	13900	482	12	1	13882	1	13900	0.0	22882
a38_F_St_Georges_Les_Baiilargeaux	a28_Kenya_Bondo	96.447	13847	472	13	1	13828	1	13846	0.0	22827
a38_F_St_Georges_Les_Baiilargeaux	a29_F_Perigueux	99.993	13883	1	0	1	13883	1	13883	0.0	25632
a38_F_St_Georges_Les_Baiilargeaux	a2_Ghana	96.396	13900	483	12	1	13882	1	13900	0.0	22877
a38_F_St_Georges_Les_Baiilargeaux	a30_F_Champagne_au_mont_d_or	99.993	13760	1	0	1	13760	1	13760	0.0	25405
a38_F_St_Georges_Les_Baiilargeaux	a31_F_Lyon	99.985	13760	2	0	1	13760	1	13760	0.0	25399
a38_F_St_Georges_Les_Baiilargeaux	a32_F_Montpellier	99.993	13883	1	0	1	13883	1	13883	0.0	25632
a38_F_St_Georges_Les_Baiilargeaux	a33_not_hermetia_F_Bayonne	81.525	12709	2071	204	1296	13881	1224	13778	0.0	10205
a38_F_St_Georges_Les_Baiilargeaux	a34_not_hermetia_F_Bayonne	81.525	12709	2071	204	1296	13881	1224	13778	0.0	10205
a38_F_St_Georges_Les_Baiilargeaux	a35_F_Lormont	99.986	13883	2	0	1	13883	1	13883	0.0	25627
a38_F_St_Georges_Les_Baiilargeaux	a36_F_Lormont	99.993	13883	1	0	1	13883	1	13883	0.0	25632
a38_F_St_Georges_Les_Baiilargeaux	a37_F_La_Force	99.993	13883	1	0	1	13883	1	13883	0.0	25632
a38_F_St_Georges_Les_Baiilargeaux	a38_F_St_Georges_Les_Baiilargeaux	100.000	13883	0	0	1	13883	1	13883	0.0	25638
a38_F_St_Georges_Les_Baiilargeaux	a39_F_Nogent_Sur_Marne	99.301	13883	97	0	1	13883	1	13883	0.0	25100
a38_F_St_Georges_Les_Baiilargeaux	a3_Ghana	96.382	13846	483	12	1	13828	1	13846	0.0	22777
a38_F_St_Georges_Les_Baiilargeaux	a40_F_Vincennes	99.299	13846	97	0	1	13846	1	13846	0.0	25032
a38_F_St_Georges_Les_Baiilargeaux	a41_F_Paris	99.993	13883	1	0	1	13883	1	13883	0.0	25632
a38_F_St_Georges_Les_Baiilargeaux	a43_F_La_Rochelle	99.986	13846	2	0	1	13846	1	13846	0.0	25558
a38_F_St_Georges_Les_Baiilargeaux	a44_F_Poitiers	99.993	13883	1	0	1	13883	1	13883	0.0	25632
a38_F_St_Georges_Les_Baiilargeaux	a45_F_Poitiers	100.000	13883	0	0	1	13883	1	13883	0.0	25638
a38_F_St_Georges_Les_Baiilargeaux	a46_F_Poitiers	99.993	13883	1	0	1	13883	1	13883	0.0	25632
a38_F_St_Georges_Les_Baiilargeaux	a47_F_Poitiers	99.993	13883	1	0	1	13883	1	13883	0.0	25632
a38_F_St_Georges_Les_Baiilargeaux	a48_F_Colomiers	99.106	13761	122	1	1	13761	1	13760	0.0	24729
a38_F_St_Georges_Les_Baiilargeaux	a49_F_Valloire_Sur_Cisse	99.993	13883	1	0	1	13883	1	13883	0.0	25632
a38_F_St_Georges_Les_Baiilargeaux	a4_Taiwan	99.986	13883	2	0	1	13883	1	13883	0.0	25627
a38_F_St_Georges_Les_Baiilargeaux	a50_F_Blois	99.993	13883	1	0	1	13883	1	13883	0.0	25632
a38_F_St_Georges_Les_Baiilargeaux	a51_F_Blois	99.985	13760	2	0	1	13760	1	13760	0.0	25399
a38_F_St_Georges_Les_Baiilargeaux	a52_F_Blois	99.287	13885	97	1	1	13883	1	13885	0.0	25091
a38_F_St_Georges_Les_Baiilargeaux	a53_F_Blois	99.978	13883	3	0	1	13883	1	13883	0.0	25621
a38_F_St_Georges_Les_Baiilargeaux	a54_F_St_Marcellin_En_Forez	99.993	13760	1	0	1	13760	1	13760	0.0	25405
a38_F_St_Georges_Les_Baiilargeaux	a55_F_Lormont	99.985	13760	2	0	1	13760	1	13760	0.0	25399
a38_F_St_Georges_Les_Baiilargeaux	a56_F_La_Rochelle	99.985	13760	2	0	1	13760	1	13760	0.0	25399
a38_F_St_Georges_Les_Baiilargeaux	a57_F_Paris	99.978	13760	3	0	1	13760	1	13760	0.0	25394
a38_F_St_Georges_Les_Baiilargeaux	a58_F_La_Rochelle	99.993	13760	1	0	1	13760	1	13760	0.0	25405
a38_F_St_Georges_Les_Baiilargeaux	a59_F_Bayonne	81.525	12709	2071	204	1296	13881	1224	13778	0.0	10205
a38_F_St_Georges_Les_Baiilargeaux	a7_Kenya_Bondo	96.447	13847	472	13	31	13858	1	13846	0.0	22827
a38_F_St_Georges_Les_Baiilargeaux	a8_Taiwan	96.389	13846	482	12	31	13858	1	13846	0.0	22783
a38_F_St_Georges_Les_Baiilargeaux	a9_Taiwan	96.395	13760	479	11	31	13773	1	13760	0.0	22646
a38_F_St_Georges_Les_Baiilargeaux	ADF04_CF	96.396	13900	483	12	1	13882	1	13900	0.0	22877
a38_F_St_Georges_Les_Baiilargeaux	AOM17_CF	96.388	13900	483	13	1	13882	1	13899	0.0	22870
a38_F_St_Georges_Les_Baiilargeaux	Berkley_female	96.403	13900	482	12	1	13882	1	13900	0.0	22882
a38_F_St_Georges_Les_Baiilargeaux	Berkley_male_	96.403	13900	482	12	1	13882	1	13900	0.0	22882
a38_F_St_Georges_Les_Baiilargeaux	Mito_Uk_Cambridge	96.403	13900	482	12	1	13882	1	13900	0.0	22882
a38_F_St_Georges_Les_Baiilargeaux	NC_035232_ref_China	96.403	13900	482	12	1	13882	1	13900	0.0	22882
a39_F_Nogent_Sur_Marne	a10_F_Avignon	96.432	13846	476	11	31	13858	1	13846	0.0	22816
a39_F_Nogent_Sur_Marne	a11_F_Angouleme	99.288	13760	96	1	31	13788	1	13760	0.0	24866
a39_F_Nogent_Sur_Marne	a12_F_Angouleme	96.489	13900	470	11	1	13882	1	13900	0.0	22949
a39_F_Nogent_Sur_Marne	a13_F_Trescleoux	99.309	13883	96	0	1	13883	1	13883	0.0	25106
a39_F_Nogent_Sur_Marne	a14_F_Dieulefit	99.307	13846	96	0	1	13846	1	13846	0.0	25037
a39_F_Nogent_Sur_Marne	a15_Mexique	97.776	13852	295	10	1	13845	1	13846	0.0	23861
a39_F_Nogent_Sur_Marne	a16_Guyane	99.575	13884	58	1	1	13883	1	13884	0.0	25311
a39_F_Nogent_Sur_Marne	a17_Guyane	99.575	13884	58	1	1	13883	1	13884	0.0	25311
a39_F_Nogent_Sur_Marne	a18_Guyane	99.574	13846	58	1	1	13845	1	13846	0.0	25241
a39_F_Nogent_Sur_Marne	a19_Ghana_2	96.432	13760	474	10	1	13743	1	13760	0.0	22674
a39_F_Nogent_Sur_Marne	a1_Ghana	96.425	13846	477	11	1	13828	1	13846	0.0	22810
a39_F_Nogent_Sur_Marne	a20_Ghana_2	96.432	13760	474	10	1	13743	1	13760	0.0	22674
a39_F_Nogent_Sur_Marne	a21_Ghana_2	96.425	13846	477	11	1	13828	1	13846	0.0	22810
a39_F_Nogent_Sur_Marne	a22_Taiwan	96.446	13900	476	11	1	13882	1	13900	0.0	22916
a39_F_Nogent_Sur_Marne	a25_Kenya_ICIPE	96.446	13900	476	11	1	13882	1	13900	0.0	22916
a39_F_Nogent_Sur_Marne	a26_Kenya_ICIPE	96.469	13847	469	12	1	13828	1	13846	0.0	22844
a39_F_Nogent_Sur_Marne	a27_Kenya_ICIPE	96.446	13900	476	11	1	13882	1	13900	0.0	22916
a39_F_Nogent_Sur_Marne	a28_Kenya_Bondo	96.476	13847	468	12	1	13828	1	13846	0.0	22849
a39_F_Nogent_Sur_Marne	a29_F_Perigueux	99.309	13883	96	0	1	13883	1	13883	0.0	25106
a39_F_Nogent_Sur_Marne	a2_Ghana	96.439	13900	477	11	1	13882	1	13900	0.0	22910
a39_F_Nogent_Sur_Marne	a30_F_Champagne_au_mont_d_or	99.302	13760	96	0	1	13760	1	13760	0.0	24879
a39_F_Nogent_Sur_Marne	a31_F_Lyon	99.295	13760	97	0	1	13760	1	13760	0.0	24873
a39_F_Nogent_Sur_Marne	a32_F_Montpellier	99.309	13883	96	0	1	13883	1	13883	0.0	25106
a39_F_Nogent_Sur_Marne	a33_not_hermetia_F_Bayonne	81.542	12710	2067	207	1296	13881	1224	13778	0.0	10216
a39_F_Nogent_Sur_Marne	a34_not_hermetia_F_Bayonne	81.542	12710	2067	207	1296	13881	1224	13778	0.0	10216
a39_F_Nogent_Sur_Marne	a35_F_Lormont	99.301	13883	97	0	1	13883	1	13883	0.0	25100
a39_F_Nogent_Sur_Marne	a36_F_Lormont	99.309	13883	96	0	1	13883	1	13883	0.0	25106
a39_F_Nogent_Sur_Marne	a37_F_La_Force	99.309	13883	96	0	1	13883	1	13883	0.0	25106
a39_F_Nogent_Sur_Marne	a38_F_St_Georges_Les_Baiilargeaux	99.301	13883	97	0	1	13883	1	13883	0.0	25100
a39_F_Nogent_Sur_Marne	a39_F_Nogent_Sur_Marne	100.000	13883	0	0	1	13883	1	13883	0.0	25638
a39_F_Nogent_Sur_Marne	a3_Ghana	96.425	13846	477	11	1	13828	1	13846	0.0	22810
a39_F_Nogent_Sur_Marne	a40_F_Vincennes	100.000	13846	0	0	1	13846	1	13846	0.0	25569
a39_F_Nogent_Sur_Marne	a41_F_Paris	99.309	13883	96	0	1	13883	1	13883	0.0	25106
a39_F_Nogent_Sur_Marne	a43_F_La_Rochelle	99.299	13846	97	0	1	13846	1	13846	0.0	25032
a39_F_Nogent_Sur_Marne	a44_F_Poitiers	99.309	13883	96	0	1	13883	1	13883	0.0	25106
a39_F_Nogent_Sur_Marne	a45_F_Poitiers	99.301	13883	97	0	1	13883	1	13883	0.0	25100
a39_F_Nogent_Sur_Marne	a46_F_Poitiers	99.309	13883	96	0	1	13883	1	13883	0.0	25106
a39_F_Nogent_Sur_Marne	a47_F_Poitiers	99.309	13883	96	0	1	13883	1	13883	0.0	25106
a39_F_Nogent_Sur_Marne	a48_F_Colomiers	99.004	13761	136	1	1	13761	1	13760	0.0	24652
a39_F_Nogent_Sur_Marne	a49_F_Valloire_Sur_Cisse	99.309	13883	96	0	1	13883	1	13883	0.0	25106
a39_F_Nogent_Sur_Marne	a4_Taiwan	99.301	13883	97	0	1	13883	1	13883	0.0	25100
a39_F_Nogent_Sur_Marne	a50_F_Blois	99.309	13883	96	0	1	13883	1	13883	0.0	25106
a39_F_Nogent_Sur_Marne	a51_F_Blois	99.295	13760	97	0	1	13760	1	13760	0.0	24873
a39_F_Nogent_Sur_Marne	a52_F_Blois	99.662	13885	45	1	1	13883	1	13885	0.0	25379
a39_F_Nogent_Sur_Marne	a53_F_Blois	99.294	13883	98	0	1	13883	1	13883	0.0	25095
a39_F_Nogent_Sur_Marne	a54_F_St_Marcellin_En_Forez	99.302	13760	96	0	1	13760	1	13760	0.0	24879
a39_F_Nogent_Sur_Marne	a55_F_Lormont	99.295	13760	97	0	1	13760	1	13760	0.0	24873
a39_F_Nogent_Sur_Marne	a56_F_La_Rochelle	99.295	13760	97	0	1	13760	1	13760	0.0	24873
a39_F_Nogent_Sur_Marne	a57_F_Paris	99.288	13760	98	0	1	13760	1	13760	0.0	24868
a39_F_Nogent_Sur_Marne	a58_F_La_Rochelle	99.302	13760	96	0	1	13760	1	13760	0.0	24879
a39_F_Nogent_Sur_Marne	a59_F_Bayonne	81.542	12710	2067	207	1296	13881	1224	13778	0.0	10216
a39_F_Nogent_Sur_Marne	a7_Kenya_Bondo	96.476	13847	468	12	31	13858	1	13846	0.0	22849
a39_F_Nogent_Sur_Marne	a8_Taiwan	96.432	13846	476	11	31	13858	1	13846	0.0	22816
a39_F_Nogent_Sur_Marne	a9_Taiwan	96.439	13760	473	10	31	13773	1	13760	0.0	22679
a39_F_Nogent_Sur_Marne	ADF04_CF	96.439	13900	477	11	1	13882	1	13900	0.0	22910
a39_F_Nogent_Sur_Marne	AOM17_CF	96.432	13900	477	12	1	13882	1	13899	0.0	22903
a39_F_Nogent_Sur_Marne	Berkley_female	96.446	13900	476	11	1	13882	1	13900	0.0	22916
a39_F_Nogent_Sur_Marne	Berkley_male_	96.446	13900	476	11	1	13882	1	13900	0.0	22916
a39_F_Nogent_Sur_Marne	Mito_Uk_Cambridge	96.446	13900	476	11	1	13882	1	13900	0.0	22916
a39_F_Nogent_Sur_Marne	NC_035232_ref_China	96.446	13900	476	11	1	13882	1	13900	0.0	22916
a3_Ghana	a10_F_Avignon	99.993	13816	1	0	31	13846	1	13816	0.0	25508
a3_Ghana	a11_F_Angouleme	96.385	13776	479	12	31	13804	1	13759	0.0	22663
a3_Ghana	a12_F_Angouleme	99.675	13846	45	0	1	13846	1	13846	0.0	25320
a3_Ghana	a13_F_Trescleoux	96.389	13846	482	12	1	13846	1	13828	0.0	22783
a3_Ghana	a14_F_Dieulefit	96.389	13846	482	12	1	13846	1	13828	0.0	22783
a3_Ghana	a15_Mexique	96.535	13852	451	18	1	13846	1	13829	0.0	22894
a3_Ghana	a16_Guyane	96.404	13847	479	12	1	13846	1	13829	0.0	22794
a3_Ghana	a17_Guyane	96.404	13847	479	12	1	13846	1	13829	0.0	22794
a3_Ghana	a18_Guyane	96.404	13847	479	12	1	13846	1	13829	0.0	22794
a3_Ghana	a19_Ghana_2	100.000	13760	0	0	1	13760	1	13760	0.0	25411
a3_Ghana	a1_Ghana	100.000	13846	0	0	1	13846	1	13846	0.0	25569
a3_Ghana	a20_Ghana_2	100.000	13760	0	0	1	13760	1	13760	0.0	25411
a3_Ghana	a21_Ghana_2	100.000	13846	0	0	1	13846	1	13846	0.0	25569
a3_Ghana	a22_Taiwan	99.993	13846	1	0	1	13846	1	13846	0.0	25564
a3_Ghana	a25_Kenya_ICIPE	99.993	13846	1	0	1	13846	1	13846	0.0	25564
a3_Ghana	a26_Kenya_ICIPE	99.610	13847	52	2	1	13846	1	13846	0.0	25270
a3_Ghana	a27_Kenya_ICIPE	99.993	13846	1	0	1	13846	1	13846	0.0	25564
a3_Ghana	a28_Kenya_Bondo	99.617	13847	51	2	1	13846	1	13846	0.0	25276
a3_Ghana	a29_F_Perigueux	96.389	13846	482	12	1	13846	1	13828	0.0	22783
a3_Ghana	a2_Ghana	100.000	13846	0	0	1	13846	1	13846	0.0	25569
a3_Ghana	a30_F_Champagne_au_mont_d_or	96.400	13777	479	11	1	13777	1	13760	0.0	22677
a3_Ghana	a31_F_Lyon	96.400	13777	479	11	1	13777	1	13760	0.0	22677
a3_Ghana	a32_F_Montpellier	96.389	13846	482	12	1	13846	1	13828	0.0	22783
a3_Ghana	a33_not_hermetia_F_Bayonne	80.742	13776	2331	253	211	13846	132	13725	0.0	10445
a3_Ghana	a33_not_hermetia_F_Bayonne	91.608	143	7	2	1	143	1	138	1.35e-50	193
a3_Ghana	a34_not_hermetia_F_Bayonne	80.742	13776	2331	253	211	13846	132	13725	0.0	10445
a3_Ghana	a34_not_hermetia_F_Bayonne	91.608	143	7	2	1	143	1	138	1.35e-50	193
a3_Ghana	a35_F_Lormont	96.382	13846	483	12	1	13846	1	13828	0.0	22777
a3_Ghana	a36_F_Lormont	96.389	13846	482	12	1	13846	1	13828	0.0	22783
a3_Ghana	a37_F_La_Force	96.389	13846	482	12	1	13846	1	13828	0.0	22783
a3_Ghana	a38_F_St_Georges_Les_Baiilargeaux	96.382	13846	483	12	1	13846	1	13828	0.0	22777
a3_Ghana	a39_F_Nogent_Sur_Marne	96.425	13846	477	10	1	13846	1	13828	0.0	22810
a3_Ghana	a3_Ghana	100.000	13846	0	0	1	13846	1	13846	0.0	25569
a3_Ghana	a40_F_Vincennes	96.425	13846	477	10	1	13846	1	13828	0.0	22810
a3_Ghana	a41_F_Paris	96.389	13846	482	12	1	13846	1	13828	0.0	22783
a3_Ghana	a43_F_La_Rochelle	96.396	13846	481	12	1	13846	1	13828	0.0	22788
a3_Ghana	a44_F_Poitiers	96.389	13846	482	12	1	13846	1	13828	0.0	22783
a3_Ghana	a45_F_Poitiers	96.382	13846	483	12	1	13846	1	13828	0.0	22777
a3_Ghana	a46_F_Poitiers	96.389	13846	482	12	1	13846	1	13828	0.0	22783
a3_Ghana	a47_F_Poitiers	96.389	13846	482	12	1	13846	1	13828	0.0	22783
a3_Ghana	a48_F_Colomiers	96.451	13778	471	11	1	13778	1	13760	0.0	22718
a3_Ghana	a49_F_Valloire_Sur_Cisse	96.389	13846	482	12	1	13846	1	13828	0.0	22783
a3_Ghana	a4_Taiwan	96.396	13846	481	12	1	13846	1	13828	0.0	22788
a3_Ghana	a50_F_Blois	96.389	13846	482	12	1	13846	1	13828	0.0	22783
a3_Ghana	a51_F_Blois	96.393	13777	480	11	1	13777	1	13760	0.0	22672
a3_Ghana	a52_F_Blois	96.389	13848	480	12	1	13846	1	13830	0.0	22785
a3_Ghana	a53_F_Blois	96.374	13846	484	12	1	13846	1	13828	0.0	22772
a3_Ghana	a54_F_St_Marcellin_En_Forez	96.400	13777	479	11	1	13777	1	13760	0.0	22677
a3_Ghana	a55_F_Lormont	96.393	13777	480	11	1	13777	1	13760	0.0	22672
a3_Ghana	a56_F_La_Rochelle	96.407	13777	478	11	1	13777	1	13760	0.0	22683
a3_Ghana	a57_F_Paris	96.385	13777	481	11	1	13777	1	13760	0.0	22666
a3_Ghana	a58_F_La_Rochelle	96.400	13777	479	11	1	13777	1	13760	0.0	22677
a3_Ghana	a59_F_Bayonne	80.742	13776	2331	253	211	13846	132	13725	0.0	10445
a3_Ghana	a59_F_Bayonne	91.608	143	7	2	1	143	1	138	1.35e-50	193
a3_Ghana	a7_Kenya_Bondo	99.616	13817	51	2	31	13846	1	13816	0.0	25220
a3_Ghana	a8_Taiwan	99.993	13816	1	0	31	13846	1	13816	0.0	25508
a3_Ghana	a9_Taiwan	99.993	13760	1	0	31	13790	1	13760	0.0	25405
a3_Ghana	ADF04_CF	100.000	13846	0	0	1	13846	1	13846	0.0	25569
a3_Ghana	AOM17_CF	99.993	13846	0	1	1	13846	1	13845	0.0	25562
a3_Ghana	Berkley_female	99.993	13846	1	0	1	13846	1	13846	0.0	25564
a3_Ghana	Berkley_male_	99.993	13846	1	0	1	13846	1	13846	0.0	25564
a3_Ghana	Mito_Uk_Cambridge	99.993	13846	1	0	1	13846	1	13846	0.0	25564
a3_Ghana	NC_035232_ref_China	99.993	13846	1	0	1	13846	1	13846	0.0	25564
a40_F_Vincennes	a10_F_Avignon	96.429	13834	476	11	31	13846	1	13834	0.0	22794
a40_F_Vincennes	a11_F_Angouleme	99.288	13760	96	1	31	13788	1	13760	0.0	24866
a40_F_Vincennes	a12_F_Angouleme	96.480	13864	470	11	1	13846	1	13864	0.0	22882
a40_F_Vincennes	a13_F_Trescleoux	99.307	13846	96	0	1	13846	1	13846	0.0	25037
a40_F_Vincennes	a14_F_Dieulefit	99.307	13846	96	0	1	13846	1	13846	0.0	25037
a40_F_Vincennes	a15_Mexique	97.776	13852	295	10	1	13845	1	13846	0.0	23861
a40_F_Vincennes	a16_Guyane	99.574	13847	58	1	1	13846	1	13847	0.0	25242
a40_F_Vincennes	a17_Guyane	99.574	13847	58	1	1	13846	1	13847	0.0	25242
a40_F_Vincennes	a18_Guyane	99.574	13846	58	1	1	13845	1	13846	0.0	25241
a40_F_Vincennes	a19_Ghana_2	96.432	13760	474	10	1	13743	1	13760	0.0	22674
a40_F_Vincennes	a1_Ghana	96.425	13846	477	11	1	13828	1	13846	0.0	22810
a40_F_Vincennes	a20_Ghana_2	96.432	13760	474	10	1	13743	1	13760	0.0	22674
a40_F_Vincennes	a21_Ghana_2	96.425	13846	477	11	1	13828	1	13846	0.0	22810
a40_F_Vincennes	a22_Taiwan	96.437	13864	476	11	1	13846	1	13864	0.0	22849
a40_F_Vincennes	a25_Kenya_ICIPE	96.437	13864	476	11	1	13846	1	13864	0.0	22849
a40_F_Vincennes	a26_Kenya_ICIPE	96.469	13847	469	12	1	13828	1	13846	0.0	22844
a40_F_Vincennes	a27_Kenya_ICIPE	96.437	13864	476	11	1	13846	1	13864	0.0	22849
a40_F_Vincennes	a28_Kenya_Bondo	96.476	13847	468	12	1	13828	1	13846	0.0	22849
a40_F_Vincennes	a29_F_Perigueux	99.307	13846	96	0	1	13846	1	13846	0.0	25037
a40_F_Vincennes	a2_Ghana	96.430	13864	477	11	1	13846	1	13864	0.0	22844
a40_F_Vincennes	a30_F_Champagne_au_mont_d_or	99.302	13760	96	0	1	13760	1	13760	0.0	24879
a40_F_Vincennes	a31_F_Lyon	99.295	13760	97	0	1	13760	1	13760	0.0	24873
a40_F_Vincennes	a32_F_Montpellier	99.307	13846	96	0	1	13846	1	13846	0.0	25037
a40_F_Vincennes	a33_not_hermetia_F_Bayonne	81.528	12673	2062	207	1296	13844	1224	13741	0.0	10176
a40_F_Vincennes	a34_not_hermetia_F_Bayonne	81.528	12673	2062	207	1296	13844	1224	13741	0.0	10176
a40_F_Vincennes	a35_F_Lormont	99.299	13846	97	0	1	13846	1	13846	0.0	25032
a40_F_Vincennes	a36_F_Lormont	99.307	13846	96	0	1	13846	1	13846	0.0	25037
a40_F_Vincennes	a37_F_La_Force	99.307	13846	96	0	1	13846	1	13846	0.0	25037
a40_F_Vincennes	a38_F_St_Georges_Les_Baiilargeaux	99.299	13846	97	0	1	13846	1	13846	0.0	25032
a40_F_Vincennes	a39_F_Nogent_Sur_Marne	100.000	13846	0	0	1	13846	1	13846	0.0	25569
a40_F_Vincennes	a3_Ghana	96.425	13846	477	11	1	13828	1	13846	0.0	22810
a40_F_Vincennes	a40_F_Vincennes	100.000	13846	0	0	1	13846	1	13846	0.0	25569
a40_F_Vincennes	a41_F_Paris	99.307	13846	96	0	1	13846	1	13846	0.0	25037
a40_F_Vincennes	a43_F_La_Rochelle	99.299	13846	97	0	1	13846	1	13846	0.0	25032
a40_F_Vincennes	a44_F_Poitiers	99.307	13846	96	0	1	13846	1	13846	0.0	25037
a40_F_Vincennes	a45_F_Poitiers	99.299	13846	97	0	1	13846	1	13846	0.0	25032
a40_F_Vincennes	a46_F_Poitiers	99.307	13846	96	0	1	13846	1	13846	0.0	25037
a40_F_Vincennes	a47_F_Poitiers	99.307	13846	96	0	1	13846	1	13846	0.0	25037
a40_F_Vincennes	a48_F_Colomiers	99.004	13761	136	1	1	13761	1	13760	0.0	24652
a40_F_Vincennes	a49_F_Valloire_Sur_Cisse	99.307	13846	96	0	1	13846	1	13846	0.0	25037
a40_F_Vincennes	a4_Taiwan	99.299	13846	97	0	1	13846	1	13846	0.0	25032
a40_F_Vincennes	a50_F_Blois	99.307	13846	96	0	1	13846	1	13846	0.0	25037
a40_F_Vincennes	a51_F_Blois	99.295	13760	97	0	1	13760	1	13760	0.0	24873
a40_F_Vincennes	a52_F_Blois	99.661	13848	45	1	1	13846	1	13848	0.0	25311
a40_F_Vincennes	a53_F_Blois	99.292	13846	98	0	1	13846	1	13846	0.0	25026
a40_F_Vincennes	a54_F_St_Marcellin_En_Forez	99.302	13760	96	0	1	13760	1	13760	0.0	24879
a40_F_Vincennes	a55_F_Lormont	99.295	13760	97	0	1	13760	1	13760	0.0	24873
a40_F_Vincennes	a56_F_La_Rochelle	99.295	13760	97	0	1	13760	1	13760	0.0	24873
a40_F_Vincennes	a57_F_Paris	99.288	13760	98	0	1	13760	1	13760	0.0	24868
a40_F_Vincennes	a58_F_La_Rochelle	99.302	13760	96	0	1	13760	1	13760	0.0	24879
a40_F_Vincennes	a59_F_Bayonne	81.528	12673	2062	207	1296	13844	1224	13741	0.0	10176
a40_F_Vincennes	a7_Kenya_Bondo	96.473	13835	468	12	31	13846	1	13834	0.0	22827
a40_F_Vincennes	a8_Taiwan	96.429	13834	476	11	31	13846	1	13834	0.0	22794
a40_F_Vincennes	a9_Taiwan	96.439	13760	473	10	31	13773	1	13760	0.0	22679
a40_F_Vincennes	ADF04_CF	96.430	13864	477	11	1	13846	1	13864	0.0	22844
a40_F_Vincennes	AOM17_CF	96.422	13864	477	12	1	13846	1	13863	0.0	22836
a40_F_Vincennes	Berkley_female	96.437	13864	476	11	1	13846	1	13864	0.0	22849
a40_F_Vincennes	Berkley_male_	96.437	13864	476	11	1	13846	1	13864	0.0	22849
a40_F_Vincennes	Mito_Uk_Cambridge	96.437	13864	476	11	1	13846	1	13864	0.0	22849
a40_F_Vincennes	NC_035232_ref_China	96.437	13864	476	11	1	13846	1	13864	0.0	22849
a41_F_Paris	a10_F_Avignon	96.396	13846	481	12	31	13858	1	13846	0.0	22788
a41_F_Paris	a11_F_Angouleme	99.985	13760	0	1	31	13788	1	13760	0.0	25398
a41_F_Paris	a12_F_Angouleme	96.482	13900	471	12	1	13882	1	13900	0.0	22943
a41_F_Paris	a13_F_Trescleoux	100.000	13883	0	0	1	13883	1	13883	0.0	25638
a41_F_Paris	a14_F_Dieulefit	100.000	13846	0	0	1	13846	1	13846	0.0	25569
a41_F_Paris	a15_Mexique	97.820	13852	289	10	1	13845	1	13846	0.0	23894
a41_F_Paris	a16_Guyane	99.258	13884	102	1	1	13883	1	13884	0.0	25067
a41_F_Paris	a17_Guyane	99.258	13884	102	1	1	13883	1	13884	0.0	25067
a41_F_Paris	a18_Guyane	99.256	13846	102	1	1	13845	1	13846	0.0	24997
a41_F_Paris	a19_Ghana_2	96.395	13760	479	11	1	13743	1	13760	0.0	22646
a41_F_Paris	a1_Ghana	96.389	13846	482	12	1	13828	1	13846	0.0	22783
a41_F_Paris	a20_Ghana_2	96.395	13760	479	11	1	13743	1	13760	0.0	22646
a41_F_Paris	a21_Ghana_2	96.389	13846	482	12	1	13828	1	13846	0.0	22783
a41_F_Paris	a22_Taiwan	96.410	13900	481	12	1	13882	1	13900	0.0	22888
a41_F_Paris	a25_Kenya_ICIPE	96.410	13900	481	12	1	13882	1	13900	0.0	22888
a41_F_Paris	a26_Kenya_ICIPE	96.447	13847	472	13	1	13828	1	13846	0.0	22827
a41_F_Paris	a27_Kenya_ICIPE	96.410	13900	481	12	1	13882	1	13900	0.0	22888
a41_F_Paris	a28_Kenya_Bondo	96.454	13847	471	13	1	13828	1	13846	0.0	22833
a41_F_Paris	a29_F_Perigueux	100.000	13883	0	0	1	13883	1	13883	0.0	25638
a41_F_Paris	a2_Ghana	96.403	13900	482	12	1	13882	1	13900	0.0	22882
a41_F_Paris	a30_F_Champagne_au_mont_d_or	100.000	13760	0	0	1	13760	1	13760	0.0	25411
a41_F_Paris	a31_F_Lyon	99.993	13760	1	0	1	13760	1	13760	0.0	25405
a41_F_Paris	a32_F_Montpellier	100.000	13883	0	0	1	13883	1	13883	0.0	25638
a41_F_Paris	a33_not_hermetia_F_Bayonne	81.533	12709	2070	204	1296	13881	1224	13778	0.0	10211
a41_F_Paris	a34_not_hermetia_F_Bayonne	81.533	12709	2070	204	1296	13881	1224	13778	0.0	10211
a41_F_Paris	a35_F_Lormont	99.993	13883	1	0	1	13883	1	13883	0.0	25632
a41_F_Paris	a36_F_Lormont	100.000	13883	0	0	1	13883	1	13883	0.0	25638
a41_F_Paris	a37_F_La_Force	100.000	13883	0	0	1	13883	1	13883	0.0	25638
a41_F_Paris	a38_F_St_Georges_Les_Baiilargeaux	99.993	13883	1	0	1	13883	1	13883	0.0	25632
a41_F_Paris	a39_F_Nogent_Sur_Marne	99.309	13883	96	0	1	13883	1	13883	0.0	25106
a41_F_Paris	a3_Ghana	96.389	13846	482	12	1	13828	1	13846	0.0	22783
a41_F_Paris	a40_F_Vincennes	99.307	13846	96	0	1	13846	1	13846	0.0	25037
a41_F_Paris	a41_F_Paris	100.000	13883	0	0	1	13883	1	13883	0.0	25638
a41_F_Paris	a43_F_La_Rochelle	99.993	13846	1	0	1	13846	1	13846	0.0	25564
a41_F_Paris	a44_F_Poitiers	100.000	13883	0	0	1	13883	1	13883	0.0	25638
a41_F_Paris	a45_F_Poitiers	99.993	13883	1	0	1	13883	1	13883	0.0	25632
a41_F_Paris	a46_F_Poitiers	100.000	13883	0	0	1	13883	1	13883	0.0	25638
a41_F_Paris	a47_F_Poitiers	100.000	13883	0	0	1	13883	1	13883	0.0	25638
a41_F_Paris	a48_F_Colomiers	99.113	13761	121	1	1	13761	1	13760	0.0	24735
[truncated: 1,668 more rows]
